# Supplementary material for: Combined In Vitro Studies and in Silico Target Fishing for the Evaluation of the Biological Activities of Diphylleia cymosa and Podophyllum hexandrum
Source: MDPI journal article supplement (doi:10.3390/molecules23123303), 2018-12-13
Supplement: s1 [file s1]

**Table S6.** Main targets predicted associated to by anti-inflammatory, antibacterial and anti-protozoa activities of lignans.

| Rank | Activity Class                   | Subdivision        | Description                                                                                                                                                                                                                                                                                                                                                                                                                                                                                                  | Target                                                                      | Symbol                 | #models | #Pairs | Score |
|------|----------------------------------|--------------------|--------------------------------------------------------------------------------------------------------------------------------------------------------------------------------------------------------------------------------------------------------------------------------------------------------------------------------------------------------------------------------------------------------------------------------------------------------------------------------------------------------------|-----------------------------------------------------------------------------|------------------------|---------|--------|-------|
| 1    | Bacteria, Salmonella Typhimurium | S. Typh PhoP       | The PhoP regulon is a major regulator of virulence in Salmonella that also controls the adaptation to Mg2+-limiting environments. The PhoP system enables Salmonella to determine its presence in an intracellular or extracellular environment, and to promote the expression of genes required for survival within or entry into host cells, respectively.                                                                                                                                                 |                                                                             |                        | 8       | 296    | 1.94  |
| 2    | Anti-Inflammatory model          | NF-kB              | NF-kB inhibition. Many cellular pathways leading to activation of NF-kB-family transcription factors have been identified to be participating in host-defense, immunity, inflammation, and cancer.                                                                                                                                                                                                                                                                                                           | signal transducer and activator of transcription 1-alpha/beta isoform alpha | STAT1                  | 12      | 322    | 1.72  |
| 3    | Plasmodium falciparum            | Plasmodium         | inhibitors of proliferation of Plasmodium falciparum                                                                                                                                                                                                                                                                                                                                                                                                                                                         |                                                                             |                        | 18      | 312    | 1.36  |
| 4    | Mycobacterium tuberculosis       | M. tb              | Sensitize Mycobacterium Tuberculosis to Beta-lactam Antibiotics                                                                                                                                                                                                                                                                                                                                                                                                                                              |                                                                             |                        | 4       | 143    | 1.32  |
| 5    | Anti-Inflammatory model          | Toll-like receptor | In atherosclerosis, kidney transplantation and other diseases, inappropriate inflammatory responses contribute to poor patient outcomes. Toll-like receptor (TLR) signaling has been strongly implicated. TLR recognition of microbial components and partner proteins signaling are important elements of the innate immune response                                                                                                                                                                        | Toll-like receptor                                                          | TLR2, TLR6, TLR3, TLR4 | 4       | 137    | 1.27  |
| 6    | Mycobacterium tuberculosis       | M. tb              | BioA catalyzes the reversible transamination between KAPA and DAPA in the biotin biosynthetic pathway. BioD catalyzes the irreversible ATP-dependent carbonylation of DAPA to provide dethiobiotin (DTB), and this step drives the BioA reaction forward.                                                                                                                                                                                                                                                    | bioA                                                                        | bioA                   | 4       | 128    | 1.19  |
| 7    | Anti-Inflammatory model          | TNF                | TNF promotes the inflammatory response, which, in turn, causes many of the clinical problems associated with autoimmune disorders such as rheumatoid arthritis, ankylosing spondylitis, inflammatory bowel disease, psoriasis, hidradenitis suppurativa and refractory asthma. These disorders are sometimes treated by using a TNF inhibitor. A TNF inhibitor is a pharmaceutical drug that suppresses the physiologic response to tumor necrosis factor (TNF), which is part of the inflammatory response. | transcription factor p65 isoform 1                                          | RELA                   | 8       | 164    | 1.07  |
| 8    | Bacteria, Staphylococcus aureus  | S. au BQS          | Inhibitors of Bacterial Quorum Sensing                                                                                                                                                                                                                                                                                                                                                                                                                                                                       |                                                                             |                        | 2       | 72     | 0.94  |
| 9    | Bacteria, Escherichia coli       | E. coli            | Several targets                                                                                                                                                                                                                                                                                                                                                                                                                                                                                              |                                                                             |                        | 13      | 175    | 0.9   |
| 10   | Anti-Inflammatory model          | STAT1              | STAT1 inhibition                                                                                                                                                                                                                                                                                                                                                                                                                                                                                             | signal transducer and activator of transcription 1-alpha/beta isoform alpha | STAT1                  | 4       | 97     | 0.9   |
| 11   | Antimicrobial, E. coli           | E. coli            | Antimicrobial Assay for E. coli BW25113                                                                                                                                                                                                                                                                                                                                                                                                                                                                      |                                                                             |                        | 2       | 67     | 0.88  |

|    |                                  |             |                                                                                                                                                                                                                                                                            |                                                             |          |    |     |      |
|----|----------------------------------|-------------|----------------------------------------------------------------------------------------------------------------------------------------------------------------------------------------------------------------------------------------------------------------------------|-------------------------------------------------------------|----------|----|-----|------|
| 12 | Plasmodium berghei               | Plasmodium  | inhibitors of Plasmodium falciparum Glucose-6-phosphate dehydrogenase                                                                                                                                                                                                      | glucose-6-phosphate dehydrogenase-6-phosphogluconolactonase | CAC24715 | 6  | 113 | 0.85 |
| 13 | Bacteria, Pseudomonas aeruginosa | Pa VIM-2    | VIM-2 metallo-beta-lactamase.                                                                                                                                                                                                                                              | Beta lactamase (plasmid)                                    | bla      | 4  | 87  | 0.81 |
| 14 | Anti-Inflammatory model          | STAT3       | STAT3 inhibition                                                                                                                                                                                                                                                           | STAT3, partial                                              | STAT3    | 4  | 79  | 0.73 |
| 15 | Mycobacterium tuberculosis       | M. tb       | Inhibit Mycobacterium Tuberculosis                                                                                                                                                                                                                                         |                                                             |          | 10 | 123 | 0.72 |
| 16 | Mycobacterium tuberculosis       | M. tb       | inhibitors of non-replicating M. Tuberculosis                                                                                                                                                                                                                              |                                                             |          | 3  | 62  | 0.66 |
| 17 | Plasmodium falciparum            | Plasmodium  | inhibitors of the Plasmodium falciparum M18 Aspartyl Aminopeptidase (PFM18AAP).                                                                                                                                                                                            | M18 aspartyl aminopeptidase                                 | PfM18AAP | 6  | 86  | 0.65 |
| 18 | Bacteria, Staphylococcus aureus  | S. au NAD   | Therapeutically unexplored target pathway, biosynthesis of an indispensable redox cofactor, nicotinamide adenine dinucleotide (NAD). Targeting of the key essential genes involved in this pathway presents a promising strategy for the development of novel antibiotics. | hypothetical protein SA1422                                 | P65502   | 1  | 34  | 0.63 |
| 19 | Plasmodium falciparum            | Plasmodium  | inhibitors of the Plasmodium falciparum M18 Alanine Aminopeptidase (PFM18AAP)                                                                                                                                                                                              | M18 aspartyl aminopeptidase                                 | PfM18AAP | 1  | 33  | 0.61 |
| 20 | Citotoxicidade, THP-1            | THP-1       | Citotoxicidade, THP-1                                                                                                                                                                                                                                                      |                                                             |          | 7  | 82  | 0.57 |
| 21 | Bacteria, Pseudomonas aeruginosa | Pa PvdQ     | Inhibitors of P. aeruginosa PvdQ acylase. Many pathogens such as P. aeruginosa produce siderophores (e.g. pyoverdine) with molecular weights below 1500 Da that bind to iron                                                                                               |                                                             |          | 2  | 40  | 0.52 |
| 22 | Plasmodium falciparum            | Plasmodium  | Inhibition of recombinant Plasmodium falciparum MIF expressed in Escherichia coli BL21 (DE3)                                                                                                                                                                               | Macrophage migration inhibitory factor homolog, putative    | MIF      | 1  | 28  | 0.52 |
| 23 | Plasmodium falciparum            | Plasmodium  | inhibit dihydroorotate dehydrogenase in Plasmodium falciparum                                                                                                                                                                                                              |                                                             |          | 1  | 27  | 0.5  |
| 24 | Bacteria, Pseudomonas aeruginosa | Pa Elastase | Elastase; Neutral metalloproteinase; PAE; Pseudolysin; Pro-elastase                                                                                                                                                                                                        | Elastase                                                    | lasB     | 1  | 27  | 0.5  |
| 25 | Bacteria, Salmonella Typhimurium | S. typh     | DSSTox (CPDBAS) Carcinogenic Potency Database SalmonellaMutagenicity                                                                                                                                                                                                       |                                                             |          | 1  | 27  | 0.5  |
| 26 | Bacteria, Pseudomonas aeruginosa | Pa IMP-1    | IMP-1metallo-beta-lactamase                                                                                                                                                                                                                                                | metallo-beta-lactamase IMP-1                                | AAN87168 | 3  | 43  | 0.46 |
| 27 | Plasmodium falciparum            | Plasmodium  | inhibitors of Plasmodium falciparum Glucose-6-phosphate dehydrogenase 6-phosphogluconolactonase                                                                                                                                                                            |                                                             |          | 1  | 24  | 0.44 |
| 28 | Plasmodium falciparum            | Plasmodium  | delayed death inhibitors of the malarial parasite plastid, 96 hour incubation                                                                                                                                                                                              |                                                             |          | 4  | 48  | 0.44 |
| 29 | Plasmodium falciparum            | Plasmodium  | inhibitors of the Plasmodium falciparum M7 Leucine Aminopeptidase (PFM17LAP)                                                                                                                                                                                               | M17 leucyl aminopeptidase                                   | LAP      | 2  | 33  | 0.43 |

|    |                            |       |                                                                   |                          |      |   |    |      |
|----|----------------------------|-------|-------------------------------------------------------------------|--------------------------|------|---|----|------|
| 30 | Mycobacterium tuberculosis | M. tb | Identify Non-Covalent Inhibitors of RecA-Intein Splicing Activity | replicative DNA helicase | dnaB | 1 | 21 | 0.39 |
|----|----------------------------|-------|-------------------------------------------------------------------|--------------------------|------|---|----|------|

**Table S7.** Targets related to anti-inflammatory effects, cytotoxicity THP-1, *Salmonella typhimurium*, *Mycobacterium tuberculosis*, *Plasmodium falciparum*, *Pseudomonas aeruginosa* and *Escherichia coli*.

|                         |                    | SVM<br>OK | Bayes<br>OK | SUM | AID     | Description                                                                                                                                                                                                                                                                                                                                                                                  | Target                                                         | Symbol     |
|-------------------------|--------------------|-----------|-------------|-----|---------|----------------------------------------------------------------------------------------------------------------------------------------------------------------------------------------------------------------------------------------------------------------------------------------------------------------------------------------------------------------------------------------------|----------------------------------------------------------------|------------|
| Anti-Inflammatory model | Toll-like receptor | 9         | 27          | 36  | 1065537 | Inhibition of TLR4                                                                                                                                                                                                                                                                                                                                                                           | Toll-like receptor 4                                           | TLR4       |
| Anti-Inflammatory model | Toll-like receptor | 0         | 10          | 10  | 941     | Inhibition of TLR4-MyD88. In atherosclerosis, kidney transplantation and other diseases, inappropriate inflammatory responses contribute to poor patient outcomes. Toll-like receptor (TLR) signaling has been strongly implicated. TLR recognition of microbial components and partner proteins signaling are important elements of the innate immune response                              | toll-like receptor 4                                           | TLR4       |
| Anti-Inflammatory model | Toll-like receptor | 27        | 27          | 54  | 1065534 | Inhibition of TLR2                                                                                                                                                                                                                                                                                                                                                                           | Toll-like receptor 2;<br>Toll-like receptor 6                  | TLR2; TLR6 |
| Anti-Inflammatory model | Toll-like receptor | 23        | 14          | 37  | 602277  | Modifiers of Toll-like and RIG-like Receptor Signaling-Poly ICStimulus                                                                                                                                                                                                                                                                                                                       | Toll-like receptor 3                                           | TLR3       |
| Anti-Inflammatory model | Cytoskeleton       | 0         |             | 0   | 1249    | Modifiers Of Cytoskeleton Assembly                                                                                                                                                                                                                                                                                                                                                           |                                                                |            |
| Anti-Inflammatory model | NF-kB              | 0         | 14          | 14  | 489006  | inhibitors of B-cell specific antigen receptor-induced NF-kB activation. Many cellular pathways leading to activation of NF-kB-family transcription factors have been identified to be participating in host-defense, immunity, inflammation, and cancer.                                                                                                                                    |                                                                |            |
| Anti-Inflammatory model | NF-kB              | 0         | 22          | 22  | 489004  | inhibitors of both B-cell and T-cell specific antigen receptor-induced NF-kB activation. Many cellular pathways leading to activation of NF-kB-family transcription factors have been identified to be participating in host-defense, immunity, inflammation, and cancer.                                                                                                                    |                                                                |            |
| Anti-Inflammatory model | NF-kB              | 27        | 27          | 54  | 435020  | inhibitors of T-cell specific antigen receptor-induced NF-kB activation. Many cellular pathways leading to activation of NF-kB-family transcription factors have been identified to be participating in host-defense, immunity, inflammation, and cancer.                                                                                                                                    |                                                                |            |
| Anti-Inflammatory model | NF-kB              | 0         | 25          | 25  | 504665  | inhibitors of T-cell specific antigen receptor-induced NF-kB activation. Many cellular pathways leading to activation of NF-kB-family transcription factors have been identified to be participating in host-defense, immunity, inflammation, and cancer.                                                                                                                                    |                                                                |            |
| Anti-Inflammatory model | NF-kB              | 0         | 22          | 22  | 489033  | inhibitors of T-cell specific antigen receptor-induced NF-kB activation. Many cellular pathways leading to activation of NF-kB-family transcription factors have been identified to be participating in host-defense, immunity, inflammation, and cancer.                                                                                                                                    |                                                                |            |
| Anti-Inflammatory model | NF-kB              | 0         | 22          | 22  | 489035  | inhibitors of T-cell specific antigen receptor-induced NF-kB activation. Many cellular pathways leading to activation of NF-kB-family transcription factors have been identified to be participating in host-defense, immunity, inflammation, and cancer.                                                                                                                                    |                                                                |            |
| Anti-Inflammatory model | NF-kB              | 23        | 6           | 29  | 2333    | inhibitors of T-cell specific antigen receptor-induced NF-kB activation. The modulation of immune response activity is one of the major goals in the development of novel therapeutics for auto-immune and inflammatory diseases. The innate system resides at the intersection of the pathways of microbial recognition, inflammation, and cell death, thereby offering various therapeutic | nucleotide-binding oligomerization domain-containing protein 1 | NOD1       |

|                         |       |    |    |    |      |                                                                                                                                                                                                                                                                                                                                                                                                                                                                                                                                                                                                                                                                                                                                                                                                                                                                                         |                                                                             |             |
|-------------------------|-------|----|----|----|------|-----------------------------------------------------------------------------------------------------------------------------------------------------------------------------------------------------------------------------------------------------------------------------------------------------------------------------------------------------------------------------------------------------------------------------------------------------------------------------------------------------------------------------------------------------------------------------------------------------------------------------------------------------------------------------------------------------------------------------------------------------------------------------------------------------------------------------------------------------------------------------------------|-----------------------------------------------------------------------------|-------------|
|                         |       |    |    |    |      | targets. In this context, NOD1 and NOD2 are of particular interest, since they recognize distinct structures derived from bacterial peptidoglycans and directly activate NF-kB, a central regulator of immune response, inflammation, and apoptosis. Mutations in the NOD1 and NOD2 genes are associated with a number of human inflammatory disorders, including Crohn's disease (CD), Blau syndrome, early-onset sarcoidosis, and atopic diseases, which characteristically cause constitutive NF-kB activation. Chemical inhibitors of NOD1 and NOD2 would provide powerful research tools for elucidating the roles of these proteins in primary cultured cells from humans and in animal models.                                                                                                                                                                                   |                                                                             |             |
| Anti-Inflammatory model | NF-kB | 20 | 22 | 42 | 1308 | NF-kappaB inhibition.                                                                                                                                                                                                                                                                                                                                                                                                                                                                                                                                                                                                                                                                                                                                                                                                                                                                   | nuclear factor NF-kappa-B p105 subunit isoform 1                            | NFKB1       |
| Anti-Inflammatory model | NF-kB | 27 | 23 | 50 | 1309 | NF-kB activation. Many cellular pathways leading to activation of NF-kB-family transcription factors have been identified to be participating in host-defense, immunity, inflammation, and cancer.                                                                                                                                                                                                                                                                                                                                                                                                                                                                                                                                                                                                                                                                                      | nuclear factor NF-kappa-B p105 subunit isoform 1                            | NFKB1       |
| Anti-Inflammatory model | NF-kB | 1  | 19 | 20 | 1306 | NF-kB activation. Many cellular pathways leading to activation of NF-kB-family transcription factors have been identified to be participating in host-defense, immunity, inflammation, and cancer.                                                                                                                                                                                                                                                                                                                                                                                                                                                                                                                                                                                                                                                                                      | signal transducer and activator of transcription 1-alpha/beta isoform alpha | STAT1       |
| Anti-Inflammatory model | NF-kB | 0  | 0  | 0  | 1241 | NF-kB activation. The pharmacological treatment of neurodegenerative disorders has been a disappointment when compared to the successes obtained in stroke, other neurological diseases like seizures, and in mental health diseases. It has to be said that the pathogenesis of neurodegenerative disorders and their early diagnosis represent a definite obstacle to effective intervention. Nuclear factor kB (NF-kB) is a key cellular signaling factor in the central nervous system. Although NF-kB signaling pathways have been extensively investigated in cancer and in immunological diseases, NF-kB role in the central nervous system physiology and pathology in non inflammatory disorders of the brain is still unclear. NF-kB has an important role as an inhibitor of neuronal apoptosis and at least in this capacity it represents an interesting target to pursue. | NFKB1 protein, partial ; transcription factor p65 isoform 1                 | NFKB1; RELA |
| Anti-Inflammatory model | NF-kB | 0  | 22 | 22 | 1303 | NF-kB inhibition. Many cellular pathways leading to activation of NF-kB-family transcription factors have been identified to be participating in host-defense, immunity, inflammation, and cancer.                                                                                                                                                                                                                                                                                                                                                                                                                                                                                                                                                                                                                                                                                      | signal transducer and activator of transcription 1-alpha/beta isoform alpha | STAT1       |
| Anti-Inflammatory model | STAT1 | 21 | 8  | 29 | 1262 | STAT1 activation                                                                                                                                                                                                                                                                                                                                                                                                                                                                                                                                                                                                                                                                                                                                                                                                                                                                        | signal transducer and activator of transcription 1-alpha/beta isoform alpha | STAT1       |
| Anti-Inflammatory model | STAT1 | 0  | 11 | 11 | 1318 | STAT1 activation                                                                                                                                                                                                                                                                                                                                                                                                                                                                                                                                                                                                                                                                                                                                                                                                                                                                        | signal transducer and activator of transcription 1-alpha/beta isoform alpha | STAT1       |
| Anti-Inflammatory model | STAT1 | 10 | 22 | 32 | 1317 | STAT1 inhibition                                                                                                                                                                                                                                                                                                                                                                                                                                                                                                                                                                                                                                                                                                                                                                                                                                                                        | signal transducer and activator of transcription 1-                         | STAT1       |

|                         |       |    |    |    |      |                                                                                                                                                                                                                                                                                                                                                                                                                                                                                                                                                                                                                                                                                                                                                                                                                                                                                                                                                                                                                                                                                                                                 |                                                                                 |       |
|-------------------------|-------|----|----|----|------|---------------------------------------------------------------------------------------------------------------------------------------------------------------------------------------------------------------------------------------------------------------------------------------------------------------------------------------------------------------------------------------------------------------------------------------------------------------------------------------------------------------------------------------------------------------------------------------------------------------------------------------------------------------------------------------------------------------------------------------------------------------------------------------------------------------------------------------------------------------------------------------------------------------------------------------------------------------------------------------------------------------------------------------------------------------------------------------------------------------------------------|---------------------------------------------------------------------------------|-------|
|                         |       |    |    |    |      |                                                                                                                                                                                                                                                                                                                                                                                                                                                                                                                                                                                                                                                                                                                                                                                                                                                                                                                                                                                                                                                                                                                                 | alpha/beta isoform alpha                                                        |       |
| Anti-Inflammatory model | STAT1 | 25 | 0  | 25 | 1263 | STAT1 inhibition                                                                                                                                                                                                                                                                                                                                                                                                                                                                                                                                                                                                                                                                                                                                                                                                                                                                                                                                                                                                                                                                                                                | signal transducer and activator of transcription 1-<br>alpha/beta isoform alpha | STAT1 |
| Anti-Inflammatory model | STAT3 | 20 | 25 | 45 | 1316 | STAT3 activation                                                                                                                                                                                                                                                                                                                                                                                                                                                                                                                                                                                                                                                                                                                                                                                                                                                                                                                                                                                                                                                                                                                | STAT3, partial                                                                  | STAT3 |
| Anti-Inflammatory model | STAT3 | 0  | 8  | 8  | 1267 | STAT3 activation                                                                                                                                                                                                                                                                                                                                                                                                                                                                                                                                                                                                                                                                                                                                                                                                                                                                                                                                                                                                                                                                                                                | STAT3, partial                                                                  | STAT3 |
| Anti-Inflammatory model | STAT3 | 0  |    | 0  | 1398 | STAT3 activation                                                                                                                                                                                                                                                                                                                                                                                                                                                                                                                                                                                                                                                                                                                                                                                                                                                                                                                                                                                                                                                                                                                | STAT3, partial                                                                  | STAT3 |
| Anti-Inflammatory model | STAT3 | 24 | 2  | 26 | 1265 | STAT3 inhibition                                                                                                                                                                                                                                                                                                                                                                                                                                                                                                                                                                                                                                                                                                                                                                                                                                                                                                                                                                                                                                                                                                                | STAT3, partial                                                                  | STAT3 |
| Anti-Inflammatory model | TNF   | 10 | 8  | 18 | 457  | Augmentation of TNFa induced VCAM-1 cell surface expression. TNF promotes the inflammatory response, which, in turn, causes many of the clinical problems associated with autoimmune disorders such as rheumatoid arthritis, ankylosing spondylitis, inflammatory bowel disease, psoriasis, hidradenitis suppurativa and refractory asthma. These disorders are sometimes treated by using a TNF inhibitor. A TNF inhibitor is a pharmaceutical drug that suppresses the physiologic response to tumor necrosis factor (TNF), which is part of the inflammatory response. TNF is involved in autoimmune and immune-mediated disorders such as rheumatoid arthritis, ankylosing spondylitis, inflammatory bowel disease, psoriasis, hidradenitis suppurativa and refractory asthma, so TNF inhibitors may be used in their treatment. The important side effects of TNF inhibitors include lymphomas, infections (especially reactivation of latent tuberculosis), congestive heart failure, demyelinating disease, a lupus-like syndrome, induction of auto-antibodies, injection site reactions, and systemic side effects.[1] |                                                                                 |       |
| Anti-Inflammatory model | TNF   | 1  | 9  | 10 | 1288 | Inhibitors of TNF alpha stimulated E Selectin expression. TNF promotes the inflammatory response, which, in turn, causes many of the clinical problems associated with autoimmune disorders such as rheumatoid arthritis, ankylosing spondylitis, inflammatory bowel disease, psoriasis, hidradenitis suppurativa and refractory asthma. These disorders are sometimes treated by using a TNF inhibitor.                                                                                                                                                                                                                                                                                                                                                                                                                                                                                                                                                                                                                                                                                                                        | selectin E                                                                      | SELE  |
| Anti-Inflammatory model | TNF   | 26 | 23 | 49 | 1013 | inhibitors of TNF alpha stimulated VCAM1 expression. TNF promotes the inflammatory response, which, in turn, causes many of the clinical problems associated with autoimmune disorders such as rheumatoid arthritis, ankylosing spondylitis, inflammatory bowel disease, psoriasis, hidradenitis suppurativa and refractory asthma. These disorders are sometimes treated by using a TNF inhibitor.                                                                                                                                                                                                                                                                                                                                                                                                                                                                                                                                                                                                                                                                                                                             |                                                                                 |       |
| Anti-Inflammatory model | TNF   | 9  | 8  | 17 | 895  | inhibitors of TNF alpha/NFkB signaling.                                                                                                                                                                                                                                                                                                                                                                                                                                                                                                                                                                                                                                                                                                                                                                                                                                                                                                                                                                                                                                                                                         | NFKB1 protein, partial                                                          | NFKB1 |
| Anti-Inflammatory model | TNF   | 27 | 1  | 28 | 2337 | inhibitors of TNFa specific NF-kB induction. TNF promotes the inflammatory response, which, in turn, causes many of the clinical problems associated with autoimmune disorders such as rheumatoid arthritis, ankylosing spondylitis, inflammatory bowel disease, psoriasis, hidradenitis suppurativa and refractory asthma. These disorders are sometimes treated by using a TNF inhibitor.                                                                                                                                                                                                                                                                                                                                                                                                                                                                                                                                                                                                                                                                                                                                     | tumor necrosis factor                                                           | TNF   |

|                                    |         |    |    |    |                     |                                                                                                                                                                                                                                                                                                                                                                                                                                                                                                                                                                                                                                                                                                                                                                                                                                             |                                                       |        |
|------------------------------------|---------|----|----|----|---------------------|---------------------------------------------------------------------------------------------------------------------------------------------------------------------------------------------------------------------------------------------------------------------------------------------------------------------------------------------------------------------------------------------------------------------------------------------------------------------------------------------------------------------------------------------------------------------------------------------------------------------------------------------------------------------------------------------------------------------------------------------------------------------------------------------------------------------------------------------|-------------------------------------------------------|--------|
| Anti-Inflammatory model            | TNF     | 10 | 22 | 32 | 1852                | inhibitors of TNF- $\alpha$ -specific NF- $\kappa$ B induction. TNF promotes the inflammatory response, which, in turn, causes many of the clinical problems associated with autoimmune disorders such as rheumatoid arthritis, ankylosing spondylitis, inflammatory bowel disease, psoriasis, hidradenitis suppurativa and refractory asthma. These disorders are sometimes treated by using a TNF inhibitor.                                                                                                                                                                                                                                                                                                                                                                                                                              | tumor necrosis factor                                 | TNF    |
| Anti-Inflammatory model            | TNF     | 5  | 5  | 10 | 2485                | inhibitors of TNF- $\alpha$ -specific NF- $\kappa$ B induction. TNF promotes the inflammatory response, which, in turn, causes many of the clinical problems associated with autoimmune disorders such as rheumatoid arthritis, ankylosing spondylitis, inflammatory bowel disease, psoriasis, hidradenitis suppurativa and refractory asthma. These disorders are sometimes treated by using a TNF inhibitor.                                                                                                                                                                                                                                                                                                                                                                                                                              | tumor necrosis factor                                 | TNF    |
| Anti-Inflammatory model            | TNF     | 0  |    | 0  | 438                 | TNF $\alpha$ induced NF $\kappa$ B translocation. Many cellular pathways leading to activation of NF- $\kappa$ B-family transcription factors have been identified to be participating in host-defense, immunity, inflammation, and cancer.                                                                                                                                                                                                                                                                                                                                                                                                                                                                                                                                                                                                 | transcription factor p65 isoform 1                    | RELA   |
| Antimicrobial, E. coli             | E. coli | 21 | 22 | 43 | 638                 | Antimicrobial Assay for E. coli BW25113 (wild type) - DR                                                                                                                                                                                                                                                                                                                                                                                                                                                                                                                                                                                                                                                                                                                                                                                    |                                                       |        |
| Antimicrobial, E. coli             | E. coli | 4  | 20 | 24 | 635                 | Antimicrobial Assay for E. coli BW25113 (wild type) mutant pool - DR                                                                                                                                                                                                                                                                                                                                                                                                                                                                                                                                                                                                                                                                                                                                                                        |                                                       |        |
| antioxidant response element (ARE) | Oxid    | 0  | 0  | 0  | 651593              | Many diseases have some form of oxidative stress injury and ties to inflammation, causing a host of problems for the patient. The antioxidant response element (ARE) plays an important role in alleviating the harmful effects of oxidative stress. The antioxidant response element (ARE) is a transcriptional regulatory element involved in the activation of genes coding for a number of antioxidant proteins and detoxifying enzymes. These enzymes work in concert to protect tissues from oxidative insults and chemical toxicities in human hepatocytes and immune cells. are essential to study the ARE pathway, and eventually to determine whether this pathway does activate genes that could protect against a host of diseases, including cardiovascular diseases, obesity, diabetes, Alzheimer's, and Parkinson's disease. | Nrf2                                                  | NFE2L2 |
| antioxidant response element (ARE) | Oxid    | 0  | 0  | 0  | 651597              | Many diseases have some form of oxidative stress injury and ties to inflammation, causing a host of problems for the patient. The antioxidant response element (ARE) plays an important role in alleviating the harmful effects of oxidative stress. The antioxidant response element (ARE) is a transcriptional regulatory element involved in the activation of genes coding for a number of antioxidant proteins and detoxifying enzymes. These enzymes work in concert to protect tissues from oxidative insults and chemical toxicities in human hepatocytes and immune cells. are essential to study the ARE pathway, and eventually to determine whether this pathway does activate genes that could protect against a host of diseases, including cardiovascular diseases, obesity, diabetes, Alzheimer's, and Parkinson's disease. | Nrf2                                                  | NFE2L2 |
| antioxidant response element (ARE) | Oxid    | 5  | 1  | 6  | 493153              | Nrf2 is a transcription factor that maintains cellular redox homeostasis and protects cells from xenobiotics [1,2]. Nrf2 binds to the antioxidant response element (ARE) to induce gene expression of a broad spectrum of genes that encode for antioxidants. Hence this Nrf2 pathway provides a first line of defense against stress caused by exposure to radiation, electrophiles, and xenobiotics. In many cancers it has been found that tumor cells have manipulate the Nrf2 pathway for their survival against cytotoxic chemotherapeutics and radiotherapeutic agents. Finding a small molecule that act as an inhibitor of Nrf2 function would represent a novel therapeutic target that could lead to improvement in survival of patients undergoing chemo- and/or radio- therapy.                                                | nuclear factor erythroid 2-related factor 2 isoform 2 | NFE2L2 |
| Antioxidante                       | Oxid    | 5  | 11 | 16 | Modelo-Antioxidante |                                                                                                                                                                                                                                                                                                                                                                                                                                                                                                                                                                                                                                                                                                                                                                                                                                             |                                                       |        |

|                                        |              |    |    |    |                           |                                                                                                                                                                                                                                                                                                                                                              |                              |              |
|----------------------------------------|--------------|----|----|----|---------------------------|--------------------------------------------------------------------------------------------------------------------------------------------------------------------------------------------------------------------------------------------------------------------------------------------------------------------------------------------------------------|------------------------------|--------------|
| Bacteria,<br>Pseudomonas<br>aeruginosa | Pa Elastase  | 0  | 27 | 27 | 468996                    | Elastase; Neutral metalloproteinase; PAE; Pseudolysin; Pro-elastase                                                                                                                                                                                                                                                                                          | Elastase                     | lasB         |
| Bacteria,<br>Pseudomonas<br>aeruginosa | Pa IMP-1     | 17 | 18 | 35 | 2756                      | IMP-1metallo-beta-lactamase                                                                                                                                                                                                                                                                                                                                  | metallo-beta-lactamase IMP-1 | AAN87168     |
| Bacteria,<br>Pseudomonas<br>aeruginosa | Pa IMP-1     | 0  | 8  | 8  | 1                         | IMP-1metallo-beta-lactamase                                                                                                                                                                                                                                                                                                                                  |                              |              |
| Bacteria,<br>Pseudomonas<br>aeruginosa | Pa IMP-1     | 0  | 0  | 0  | 2189                      | IMP-1metallo-beta-lactamase                                                                                                                                                                                                                                                                                                                                  | metallo-beta-lactamase IMP-1 | AAN87168     |
| Bacteria,<br>Pseudomonas<br>aeruginosa | Pa LasB      | 0  | 0  | 0  | 624096                    | Inhibitor profiling of the Pseudomonas aeruginosa virulence factor LasB using N-alpha mercaptoamide template-based inhibitors. Bioorg Med Chem Lett. 2009 Nov 1; 19(21):6230-2                                                                                                                                                                               | metallo beta-lactamase       | blaVIM-2     |
| Bacteria,<br>Pseudomonas<br>aeruginosa | Pa PvdQ      | 8  | 15 | 23 | 493231                    | Inhibitors of P. aeruginosa PvdQ acylase. Many pathogens such as P. aeruginosa produce siderophores (e.g. pyoverdine) with molecular weights below 1500 Da that bind to iron                                                                                                                                                                                 | protein PvdQ                 | YP_002440506 |
| Bacteria,<br>Pseudomonas<br>aeruginosa | Pa PvdQ      | 4  | 13 | 17 | PvdQ pyoverdine synthesis | Inhibitors of P. aeruginosa PvdQ acylase. Many pathogens such as P. aeruginosa produce siderophores (e.g. pyoverdine) with molecular weights below 1500 Da that bind to iron                                                                                                                                                                                 |                              |              |
| Bacteria,<br>Pseudomonas<br>aeruginosa | Pa TEM-1     | 3  | 21 | 24 | 2755                      | TEM-1 serine-beta-lactamase.                                                                                                                                                                                                                                                                                                                                 | Beta lactamase (plasmid)     | bla          |
| Bacteria,<br>Pseudomonas<br>aeruginosa | Pa TEM-1     | 5  | 0  | 5  | 2184                      | TEM-1 serine-beta-lactamase.                                                                                                                                                                                                                                                                                                                                 | Beta lactamase (plasmid)     | bla          |
| Bacteria,<br>Pseudomonas<br>aeruginosa | Pa VIM-2     | 17 | 21 | 38 | 2                         | VIM-2 metallo-beta-lactamase.                                                                                                                                                                                                                                                                                                                                |                              |              |
| Bacteria,<br>Pseudomonas<br>aeruginosa | Pa VIM-3     | 16 | 20 | 36 | 2754                      | VIM-2 metallo-beta-lactamase.                                                                                                                                                                                                                                                                                                                                | metallo beta-lactamase       | blaVIM-2     |
| Bacteria,<br>Pseudomonas<br>aeruginosa | Pa VIM-4     | 13 | 0  | 13 | 2187                      | VIM-2 metallo-beta-lactamase.                                                                                                                                                                                                                                                                                                                                | metallo beta-lactamase       | blaVIM-2     |
| Bacteria,<br>Pseudomonas<br>aeruginosa | Pa VIM-5     | 0  | 0  | 0  | 1860                      | VIM-2 metallo-beta-lactamase.                                                                                                                                                                                                                                                                                                                                | Beta lactamase (plasmid)     | bla          |
| Bacteria,<br>Salmonella<br>Typhimurium | S. typh      | 27 | 0  | 27 | 1194                      | DSSTox (CPDBAS) Carcinogenic Potency Database Salmonella Mutagenicity                                                                                                                                                                                                                                                                                        |                              |              |
| Bacteria,<br>Salmonella<br>Typhimurium | S. Typh PhoP | 27 | 27 | 54 | 2831                      | The PhoP regulon is a major regulator of virulence in Salmonella that also controls the adaptation to Mg2+-limiting environments. The PhoP system enables Salmonella to determine its presence in an intracellular or extracellular environment, and to promote the expression of genes required for survival within or entry into host cells, respectively. |                              |              |
| Bacteria,<br>Salmonella<br>Typhimurium | S. Typh PhoP | 27 | 27 | 54 | 2834                      | The PhoP regulon is a major regulator of virulence in Salmonella that also controls the adaptation to Mg2+-limiting environments. The PhoP system enables Salmonella to determine its presence in an intracellular or extracellular                                                                                                                          |                              |              |

|                                  |              |    |    |    |        |                                                                                                                                                                                                                                                                                                                                                                                                                                                                                                                                                                                                                                                                                         |                             |        |
|----------------------------------|--------------|----|----|----|--------|-----------------------------------------------------------------------------------------------------------------------------------------------------------------------------------------------------------------------------------------------------------------------------------------------------------------------------------------------------------------------------------------------------------------------------------------------------------------------------------------------------------------------------------------------------------------------------------------------------------------------------------------------------------------------------------------|-----------------------------|--------|
|                                  |              |    |    |    |        | environment, and to promote the expression of genes required for survival within or entry into host cells, respectively.                                                                                                                                                                                                                                                                                                                                                                                                                                                                                                                                                                |                             |        |
| Bacteria, Salmonella Typhimurium | S. Typh PhoP | 27 | 27 | 54 | 2839   | The PhoP regulon is a major regulator of virulence in Salmonella that also controls the adaptation to Mg2+-limiting environments. The PhoP system enables Salmonella to determine its presence in an intracellular or extracellular environment, and to promote the expression of genes required for survival within or entry into host cells, respectively.                                                                                                                                                                                                                                                                                                                            |                             |        |
| Bacteria, Salmonella Typhimurium | S. Typh PhoP | 27 | 25 | 52 | 2840   | The PhoP regulon is a major regulator of virulence in Salmonella that also controls the adaptation to Mg2+-limiting environments. The PhoP system enables Salmonella to determine its presence in an intracellular or extracellular environment, and to promote the expression of genes required for survival within or entry into host cells, respectively.                                                                                                                                                                                                                                                                                                                            |                             |        |
| Bacteria, Salmonella Typhimurium | S. Typh PhoP | 11 | 19 | 30 | 1981   | The PhoP regulon is a major regulator of virulence in Salmonella that also controls the adaptation to Mg2+-limiting environments. The PhoP system enables Salmonella to determine its presence in an intracellular or extracellular environment, and to promote the expression of genes required for survival within or entry into host cells, respectively.                                                                                                                                                                                                                                                                                                                            |                             |        |
| Bacteria, Salmonella Typhimurium | S. Typh PhoP | 9  | 19 | 28 | 2401   | The PhoP regulon is a major regulator of virulence in Salmonella that also controls the adaptation to Mg2+-limiting environments. The PhoP system enables Salmonella to determine its presence in an intracellular or extracellular environment, and to promote the expression of genes required for survival within or entry into host cells, respectively.                                                                                                                                                                                                                                                                                                                            |                             |        |
| Bacteria, Salmonella Typhimurium | S. Typh PhoP | 0  | 13 | 13 | 2384   | The PhoP regulon is a major regulator of virulence in Salmonella that also controls the adaptation to Mg2+-limiting environments. The PhoP system enables Salmonella to determine its presence in an intracellular or extracellular environment, and to promote the expression of genes required for survival within or entry into host cells, respectively.                                                                                                                                                                                                                                                                                                                            |                             |        |
| Bacteria, Salmonella Typhimurium | S. Typh PhoP | 0  | 11 | 11 | 1985   | The PhoP regulon is a major regulator of virulence in Salmonella that also controls the adaptation to Mg2+-limiting environments. The PhoP system enables Salmonella to determine its presence in an intracellular or extracellular environment, and to promote the expression of genes required for survival within or entry into host cells, respectively.                                                                                                                                                                                                                                                                                                                            |                             |        |
| Bacteria, Staphylococcus aureus  | S. au BQS    | 17 | 22 | 39 | 700    | Inhibitors of Bacterial Quorum Sensing                                                                                                                                                                                                                                                                                                                                                                                                                                                                                                                                                                                                                                                  |                             |        |
| Bacteria, Staphylococcus aureus  | S. au BQS    | 11 | 22 | 33 | 1014   | Inhibitors of Bacterial Quorum Sensing                                                                                                                                                                                                                                                                                                                                                                                                                                                                                                                                                                                                                                                  |                             |        |
| Bacteria, Staphylococcus aureus  | S. au NAD    | 12 | 22 | 34 | 624309 | Comparative and functional genomics studies identified a therapeutically unexplored target pathway, biosynthesis of an indispensable redox cofactor, nicotinamide adenine dinucleotide (NAD). Targeting of the key essential genes involved in this pathway presents a promising strategy for the development of novel antibiotics. Blocking NAD biosynthesis by inhibition of an essential enzyme, a nicotinic acid mononucleotide adenylyltransferase (NaMNAT) of the NadD family conserved in most bacterial pathogens, leads to growth suppression of Gram-negative and Gram-positive bacteria, thus validating it as a druggable target amenable to inhibition by small molecules. | hypothetical protein SA1422 | P65502 |
| Cytotoxicity, THP-1              | THP-1        | 21 | 27 | 48 | 504852 | Cytotoxicity, THP-1                                                                                                                                                                                                                                                                                                                                                                                                                                                                                                                                                                                                                                                                     |                             |        |
| Cytotoxicity, THP-1              | THP-1        | 7  | 15 | 22 | THP1   | Cytotoxicity, THP-1                                                                                                                                                                                                                                                                                                                                                                                                                                                                                                                                                                                                                                                                     |                             |        |

|                     |         |    |    |    |         |                                                                                                                                                                                                                                                                                                                                                                                                                                                                                                                                                                                                          |                                                                                                                                        |                  |
|---------------------|---------|----|----|----|---------|----------------------------------------------------------------------------------------------------------------------------------------------------------------------------------------------------------------------------------------------------------------------------------------------------------------------------------------------------------------------------------------------------------------------------------------------------------------------------------------------------------------------------------------------------------------------------------------------------------|----------------------------------------------------------------------------------------------------------------------------------------|------------------|
| Cytotoxicity, THP-1 | THP-1   | 6  | 4  | 10 | 489025  | Cytotoxicity, THP-1                                                                                                                                                                                                                                                                                                                                                                                                                                                                                                                                                                                      |                                                                                                                                        |                  |
| Cytotoxicity, THP-1 | THP-1   | 0  | 2  | 2  | 1117359 | Cytotoxicity, THP-1                                                                                                                                                                                                                                                                                                                                                                                                                                                                                                                                                                                      |                                                                                                                                        |                  |
| Cytotoxicity, THP-1 | THP-1   | 0  | 0  | 0  | 2252    | Cytotoxicity, THP-1                                                                                                                                                                                                                                                                                                                                                                                                                                                                                                                                                                                      |                                                                                                                                        |                  |
| Cytotoxicity, THP-1 | THP-1   | 0  | 0  | 0  | 2253    | Cytotoxicity, THP-1                                                                                                                                                                                                                                                                                                                                                                                                                                                                                                                                                                                      |                                                                                                                                        |                  |
| Cytotoxicity, THP-1 | THP-1   | 0  | 0  | 0  | 504683  | Cytotoxicity, THP-1                                                                                                                                                                                                                                                                                                                                                                                                                                                                                                                                                                                      |                                                                                                                                        |                  |
| Escherichia coli    | E. coli | 11 | 22 | 33 | 504843  | Bacterial Growth Inhibition. E. coli system was designed to identify inhibitors of translocation of fully folded protein through the Twin Arginine Translocation (Tat) system, through induced expression of the Tat machinery and cargo protein. Both inhibitors of the Tat system and to cell growth show a positive result, and decrease the fluorescence signal detected from the engineered fluorescent cargo protein. To separate specific Tat inhibitors from non-specific growth inhibitors, an antibacterial counter screen was performed to identify non-specific bacterial growth inhibitors. |                                                                                                                                        |                  |
| Escherichia coli    | E. coli | 2  | 22 | 24 | 1966    | Beta-galactosidase                                                                                                                                                                                                                                                                                                                                                                                                                                                                                                                                                                                       | Beta-galactosidase                                                                                                                     | Q8VNN2           |
| Escherichia coli    | E. coli | 0  | 0  | 0  | 488956  | Cytotoxicity, bacterial viability (counterscreen). nonselective inhibitors of the AddAB helicase-nuclease complex due to bacterial cytotoxicity                                                                                                                                                                                                                                                                                                                                                                                                                                                          |                                                                                                                                        |                  |
| Escherichia coli    | E. coli | 0  | 4  | 4  | 651983  | Cytotoxicity, bacterial viability (counterscreen). nonselective inhibitors of the RecBCD due to bacterial cytotoxicity                                                                                                                                                                                                                                                                                                                                                                                                                                                                                   |                                                                                                                                        |                  |
| Escherichia coli    | E. coli | 0  | 9  | 9  | 720486  | Counterscreen, E. coli SSB                                                                                                                                                                                                                                                                                                                                                                                                                                                                                                                                                                               |                                                                                                                                        |                  |
| Escherichia coli    | E. coli | 0  | 1  | 1  | 365     | E. coli RNase H Inhibition                                                                                                                                                                                                                                                                                                                                                                                                                                                                                                                                                                               | Ribonuclease HI                                                                                                                        | rnhA             |
| Escherichia coli    | E. coli | 0  | 21 | 21 | 488955  | exonuclease V (RecBCD complex) [Escherichia coli str. K-12 substr. MG1655]. As designed, compounds that inhibit RecBCD will allow the virus to replicate and block bacterial growth                                                                                                                                                                                                                                                                                                                                                                                                                      | exonuclease V (RecBCD complex), beta subunit; exonuclease V (RecBCD complex), gamma chain; exonuclease V (RecBCD complex), alpha chain | RECB; RECC; RECD |
| Escherichia coli    | E. coli | 0  | 8  | 8  | 651982  | exonuclease V (RecBCD complex) [Escherichia coli str. K-12 substr. MG1655]. As designed, compounds that inhibit RecBCD will allow the virus to replicate and block bacterial growth                                                                                                                                                                                                                                                                                                                                                                                                                      | exonuclease V (RecBCD complex), beta subunit; exonuclease V (RecBCD complex), alpha chain                                              | RECB; RECD       |
| Escherichia coli    | E. coli | 0  | 1  | 1  | 623921  | exonuclease V (RecBCD complex) [Escherichia coli str. K-12 substr. MG1655]. As designed, compounds that inhibit RecBCD will allow the virus to replicate and block bacterial growth                                                                                                                                                                                                                                                                                                                                                                                                                      | exonuclease V (RecBCD complex), beta subunit; exonuclease V (RecBCD complex), gamma chain                                              | RECB; RECC       |
| Escherichia coli    | E. coli | 14 | 22 | 36 | 602230  | inhibitors of Escherichia coli DNA-binding ATP-dependent protease La (eLon)                                                                                                                                                                                                                                                                                                                                                                                                                                                                                                                              | DNA-binding ATP-dependent protease La                                                                                                  | lon              |
| Escherichia coli    | E. coli | 22 |    | 22 | 588481  | mRNA interferase toxin, antitoxin is MazE [Escherichia coli str. K-12 substr. MG1655]. The goal of the assay is to identify compounds that can disrupt the MazEF TA system and effectively activate the MazF toxin. Compounds with                                                                                                                                                                                                                                                                                                                                                                       | mRNA interferase toxin, antitoxin is MazE                                                                                              | mazF             |

|                            |         |    |    |    |        |                                                                                                                                                                                                                                                                                                        |                                                                                    |          |
|----------------------------|---------|----|----|----|--------|--------------------------------------------------------------------------------------------------------------------------------------------------------------------------------------------------------------------------------------------------------------------------------------------------------|------------------------------------------------------------------------------------|----------|
|                            |         |    |    |    |        | EC50 ≤ 20uM are desired. The discovery of such compounds would enable the validation of toxin activation as a novel antibacterial strategy, and the compounds themselves would have potential as antimicrobial agents.                                                                                 |                                                                                    |          |
| Escherichia coli           | E. coli | 0  | 8  | 8  | 504941 | Screen for inhibitors of E. coli twin-arginine translocation (TAT) system.                                                                                                                                                                                                                             | TatABCE protein translocation system subunit                                       | tatA     |
| Escherichia coli           | E. coli | 1  | 7  | 8  | 2320   | Shiga toxin (Stx) is released by certain strains of E. coli and is associated with food-borne gastroenteritis. In some patients, especially children, the toxin enters the bloodstream and causes hemolytic uremic syndrome, a condition that results in kidney, heart, and occasionally brain injury. | shiga toxin 1 variant A subunit                                                    | BAC78637 |
| Mycobacterium tuberculosis | M. tb   | 20 | 27 | 47 | 720590 | BioA catalyzes the reversible transamination between KAPA and DAPA in the biotin biosynthetic pathway. BioD catalyzes the irreversible ATP-dependent carbonylation of DAPA to provide dethiobiotin (DTB), and this step drives the BioA reaction forward.                                              | bioA                                                                               | bioA     |
| Mycobacterium tuberculosis | M. tb   | 2  | 27 | 29 | 743070 | BioA catalyzes the reversible transamination between KAPA and DAPA in the biotin biosynthetic pathway. BioD catalyzes the irreversible ATP-dependent carbonylation of DAPA to provide dethiobiotin (DTB), and this step drives the BioA reaction forward.                                              | bioA                                                                               | bioA     |
| Mycobacterium tuberculosis | M. tb   | 0  | 27 | 27 | 743073 | BioA catalyzes the reversible transamination between KAPA and DAPA in the biotin biosynthetic pathway. BioD catalyzes the irreversible ATP-dependent carbonylation of DAPA to provide dethiobiotin (DTB), and this step drives the BioA reaction forward.                                              | bioA                                                                               | bioA     |
| Mycobacterium tuberculosis | M. tb   | 0  | 25 | 25 | 743071 | BioA catalyzes the reversible transamination between KAPA and DAPA in the biotin biosynthetic pathway. BioD catalyzes the irreversible ATP-dependent carbonylation of DAPA to provide dethiobiotin (DTB), and this step drives the BioA reaction forward.                                              | bioA                                                                               | bioA     |
| Mycobacterium tuberculosis | M. tb   | 14 | 0  | 14 | 492952 | Compounds that Modulate Non-Replicating, Drug-tolerant Compounds in Replicating H37Rv TB of Mycobacterium tuberculosis                                                                                                                                                                                 |                                                                                    |          |
| Mycobacterium tuberculosis | M. tb   | 17 | 5  | 22 | 743175 | Elucidation of physiology of non-replicating, drug-tolerant Mycobacterium tuberculosis                                                                                                                                                                                                                 |                                                                                    |          |
| Mycobacterium tuberculosis | M. tb   | 4  | 11 | 15 | 624273 | FATTY-ACID-CoA LIGASE FADD28 (FATTY-ACID-CoA SYNTHETASE) (FATTY-ACID-CoA SYNTHASE) [Mycobacterium tuberculosis H37Rv]                                                                                                                                                                                  | FATTY-ACID-CoA LIGASE FADD28 (FATTY-ACID-CoA SYNTHETASE) (FATTY-ACID-CoA SYNTHASE) | fadD28   |
| Mycobacterium tuberculosis | M. tb   | 0  | 21 | 21 | 449750 | Identify Non-Covalent Inhibitors of RecA-Intein Splicing Activity                                                                                                                                                                                                                                      | replicative DNA helicase                                                           | dnaB     |
| Mycobacterium Tuberculosis | M. tb   | 2  | 6  | 8  | 504860 | Inhibit Mycobacterium Tuberculosis                                                                                                                                                                                                                                                                     |                                                                                    |          |
| Mycobacterium Tuberculosis | M. tb   | 2  | 5  | 7  | 504898 | Inhibit Mycobacterium Tuberculosis                                                                                                                                                                                                                                                                     |                                                                                    |          |
| Mycobacterium Tuberculosis | M. tb   | 2  | 5  | 7  | 504903 | Inhibit Mycobacterium Tuberculosis                                                                                                                                                                                                                                                                     |                                                                                    |          |
| Mycobacterium Tuberculosis | M. tb   | 2  | 2  | 4  | 504857 | Inhibit Mycobacterium Tuberculosis                                                                                                                                                                                                                                                                     |                                                                                    |          |
| Mycobacterium Tuberculosis | M. tb   | 2  | 2  | 4  | 504901 | Inhibit Mycobacterium Tuberculosis                                                                                                                                                                                                                                                                     |                                                                                    |          |
| Mycobacterium Tuberculosis | M. tb   | 1  | 2  | 3  | 504897 | Inhibit Mycobacterium Tuberculosis                                                                                                                                                                                                                                                                     |                                                                                    |          |

|                            |            |    |    |    |                                                                         |                                                                                                    |                                                              |          |
|----------------------------|------------|----|----|----|-------------------------------------------------------------------------|----------------------------------------------------------------------------------------------------|--------------------------------------------------------------|----------|
| Mycobacterium tuberculosis | M. tb      | 0  | 1  | 1  | 1332                                                                    | Inhibit Mycobacterium Tuberculosis                                                                 |                                                              |          |
| Mycobacterium tuberculosis | M. tb      | 27 | 8  | 35 | 504645                                                                  | Inhibit Mycobacterium Tuberculosis                                                                 |                                                              |          |
| Mycobacterium tuberculosis | M. tb      | 27 | 8  | 35 | 504646                                                                  | Inhibit Mycobacterium Tuberculosis                                                                 |                                                              |          |
| Mycobacterium tuberculosis | M. tb      | 14 | 5  | 19 | 449764                                                                  | Inhibit Mycobacterium Tuberculosis                                                                 |                                                              |          |
| Mycobacterium tuberculosis | M. tb      | 2  | 0  | 2  | 540359                                                                  | Inhibitors of Mycobacterium tuberculosis UDP-galactopyranose mutase (UGM) enzyme                   | UDP-galactopyranose mutase                                   | glf      |
| Mycobacterium tuberculosis | M. tb      | 0  | 26 | 26 | 651617                                                                  | inhibitors of non-replicating M. tb using log phase replicating mycobacteria                       |                                                              |          |
| Mycobacterium tuberculosis | M. tb      | 7  | 0  | 7  | 435010                                                                  | Inhibitors of RecA-Intein Splicing Activity                                                        | recombinase A                                                | recA     |
| Mycobacterium tuberculosis | M. tb      | 0  | 0  | 0  | 489010                                                                  | Inhibitors of RecA-Intein Splicing Activity                                                        | recombinase A                                                | recA     |
| Mycobacterium tuberculosis | M. tb      | 0  | 0  | 0  | 652135                                                                  | inhibitors of the fructose-bisphosphate aldolase (FBA) of M. tuberculosis                          | fructose-bisphosphate aldolase                               | fba      |
| Mycobacterium tuberculosis | M. tb      | 0  | 0  | 0  | 2761                                                                    | inhibitors of the membrane-associated serine protease Rv3671c in M.tuberculosis                    | serine protease                                              | Rv3671c  |
| Mycobacterium tuberculosis | M. tb      | 1  | 1  | 2  | PHOSPHOTYROSINE PROTEIN PHOSPHATASE PTPB (PROTEIN-TYROSINE-PHOSPHATASE) | Mycobacterium_tuberculosis-PHOSPHOTYROSINE_PROTEIN_PHOSPHATASE_PTPB_(PROTEIN-TYROSINE-PHOSPHATASE) |                                                              |          |
| Mycobacterium tuberculosis | M. tb      | 27 | 27 | 54 | 504703                                                                  | Sensitize Mycobacterium Tuberculosis to Beta-lactam Antibiotics                                    |                                                              |          |
| Mycobacterium tuberculosis | M. tb      | 26 | 27 | 53 | 504702                                                                  | Sensitize Mycobacterium Tuberculosis to Beta-lactam Antibiotics                                    |                                                              |          |
| Mycobacterium tuberculosis | M. tb      | 13 | 16 | 29 | 434987                                                                  | Sensitize Mycobacterium Tuberculosis to Beta-lactam Antibiotics                                    |                                                              |          |
| Mycobacterium tuberculosis | M. tb      | 0  | 7  | 7  | 493013                                                                  | Sensitize Mycobacterium Tuberculosis to Beta-lactam Antibiotics                                    |                                                              |          |
| Plasmodium berghei         | Plasmodium | 16 | 22 | 38 | 540269                                                                  | inhibitors of Plasmodium falciparum Glucose-6-phosphate dehydrogenase                              | glucose-6-phosphate dehydrogenase-6-phospho-gluconolactonase | CAC24715 |
| Plasmodium berghei         | Plasmodium | 14 | 22 | 36 | 504753                                                                  | inhibitors of Plasmodium falciparum Glucose-6-phosphate dehydrogenase                              | glucose-6-phosphate dehydrogenase-6-phospho-gluconolactonase | CAC24715 |
| Plasmodium berghei         | Plasmodium | 14 | 9  | 23 | 540252                                                                  | inhibitors of Plasmodium falciparum Glucose-6-phosphate dehydrogenase                              | glucose-6-phosphate dehydrogenase-6-phospho-gluconolactonase | CAC24715 |
| Plasmodium berghei         | Plasmodium | 0  | 16 | 16 | 504765                                                                  | inhibitors of Plasmodium falciparum Glucose-6-phosphate dehydrogenase                              | glucose-6-phosphate dehydrogenase-6-phospho-gluconolactonase | CAC24715 |

|                       |            |    |    |    |         |                                                                                                                                                                                                                                                                                                                                                                                                                                                                                                                                                                                                                                                                                         |                                                              |           |
|-----------------------|------------|----|----|----|---------|-----------------------------------------------------------------------------------------------------------------------------------------------------------------------------------------------------------------------------------------------------------------------------------------------------------------------------------------------------------------------------------------------------------------------------------------------------------------------------------------------------------------------------------------------------------------------------------------------------------------------------------------------------------------------------------------|--------------------------------------------------------------|-----------|
| Plasmodium berghei    | Plasmodium | 0  | 0  | 0  | 588415  | inhibitors of Plasmodium falciparum Glucose-6-phosphate dehydrogenase                                                                                                                                                                                                                                                                                                                                                                                                                                                                                                                                                                                                                   | glucose-6-phosphate dehydrogenase-6-phospho-gluconolactonase | CAC24715  |
| Plasmodium berghei    | Plasmodium | 0  | 0  | 0  | 588593  | inhibitors of Plasmodium falciparum Glucose-6-phosphate dehydrogenase                                                                                                                                                                                                                                                                                                                                                                                                                                                                                                                                                                                                                   | glucose-6-phosphate dehydrogenase-6-phospho-gluconolactonase | CAC24715  |
| Plasmodium falciparum | Plasmodium | 0  | 5  | 5  | 1159586 | Biochemical screen of P. falciparum PK6                                                                                                                                                                                                                                                                                                                                                                                                                                                                                                                                                                                                                                                 | protein kinase 6                                             | PfPK6     |
| Plasmodium falciparum | Plasmodium | 12 | 2  | 14 | 488752  | delayed death inhibitors of the malarial parasite plastid, 48 hour incubation                                                                                                                                                                                                                                                                                                                                                                                                                                                                                                                                                                                                           |                                                              |           |
| Plasmodium falciparum | Plasmodium | 4  | 1  | 5  | 504850  | delayed death inhibitors of the malarial parasite plastid, 48 hour incubation                                                                                                                                                                                                                                                                                                                                                                                                                                                                                                                                                                                                           |                                                              |           |
| Plasmodium falciparum | Plasmodium | 11 | 5  | 16 | 504848  | delayed death inhibitors of the malarial parasite plastid, 96 hour incubation                                                                                                                                                                                                                                                                                                                                                                                                                                                                                                                                                                                                           |                                                              |           |
| Plasmodium falciparum | Plasmodium | 11 | 2  | 13 | 488745  | delayed death inhibitors of the malarial parasite plastid, 96 hour incubation                                                                                                                                                                                                                                                                                                                                                                                                                                                                                                                                                                                                           |                                                              |           |
| Plasmodium falciparum | Plasmodium | 0  | 1  | 1  | 743244  | Gametocytocidal Compounds. To be transmitted from person to person via a mosquito, the parasites must switch from asexual to sexual development and produce male and female gametocytes. Malaria gametocytes consist of five stages (I, II, III, IV and V). The late stage gametocytes (III, IV and V) are difficult to be cultured in vitro and the long lifespan of mature gametocytes allows them being transmitted from host to mosquitoes unless they are completely eliminated by gametocytocidal agents.                                                                                                                                                                         |                                                              |           |
| Plasmodium falciparum | Plasmodium | 1  | 0  | 1  | 1154    | identify antagonists of the plasmodial surface anion channel (PSAC)                                                                                                                                                                                                                                                                                                                                                                                                                                                                                                                                                                                                                     |                                                              |           |
| Plasmodium falciparum | Plasmodium | 0  | 0  | 0  | 1155    | identify antagonists of the plasmodial surface anion channel (PSAC)                                                                                                                                                                                                                                                                                                                                                                                                                                                                                                                                                                                                                     |                                                              |           |
| Plasmodium falciparum | Plasmodium | 0  | 0  | 0  | 1157    | identify antagonists of the plasmodial surface anion channel (PSAC)                                                                                                                                                                                                                                                                                                                                                                                                                                                                                                                                                                                                                     |                                                              |           |
| Plasmodium falciparum | Plasmodium | 25 | 2  | 27 | 1175    | inhibit dihydroorotate dehydrogenase in Plasmodium falciparum                                                                                                                                                                                                                                                                                                                                                                                                                                                                                                                                                                                                                           |                                                              |           |
| Plasmodium falciparum | Plasmodium | 2  | 2  | 4  | 540271  | inhibiting malaria HSP40-mediated yeast toxicity. During its life cycle in its human host P. falciparum infects and remodels red blood cells. Strikingly, P. falciparum also shows a marked expansion of the heat shock protein 40 (Hsp40) family of co-chaperones and it has been proposed that during this process the parasite relies on a greatly expanded class of Hsp40 co-chaperones to infect and kill cells. In this screening project, the capacity of small molecules to block malaria HSP40-mediated yeast toxicity and induce yeast growth will be measured through luminescence mediated by the presence of intracellular ATP in yeast as an indicator of cell viability. | HSP40, subfamily A, putative                                 | PF14_0359 |
| Plasmodium falciparum | Plasmodium | 0  | 0  | 0  | 1159585 | inhibition of calcium-dependent protein kinase 1 from Plasmodium falciparum                                                                                                                                                                                                                                                                                                                                                                                                                                                                                                                                                                                                             | Calcium-dependent protein kinase 1                           | CDPK1     |
| Plasmodium falciparum | Plasmodium | 0  | 1  | 1  | 1159588 | inhibition of calcium-dependent protein kinase 4 from Plasmodium falciparum                                                                                                                                                                                                                                                                                                                                                                                                                                                                                                                                                                                                             | calcium-dependent protein kinase 4                           | PfCDPK4   |
| Plasmodium falciparum | Plasmodium | 0  | 27 | 27 | 2302    | Inhibition of P. falciparum Dd2                                                                                                                                                                                                                                                                                                                                                                                                                                                                                                                                                                                                                                                         | lactate dehydrogenase                                        | ABH03417  |
| Plasmodium falciparum | Plasmodium | 13 | 15 | 28 | 711030  | Inhibition of recombinant Plasmodium falciparum MIF expressed in Escherichia coli BL21 (DE3)                                                                                                                                                                                                                                                                                                                                                                                                                                                                                                                                                                                            | Macrophage migration inhibitory                              | MIF       |

|                       |            |    |    |    |                                                                                    |                                                                                                                                                                                                                                                                   |                             |  |
|-----------------------|------------|----|----|----|------------------------------------------------------------------------------------|-------------------------------------------------------------------------------------------------------------------------------------------------------------------------------------------------------------------------------------------------------------------|-----------------------------|--|
|                       |            |    |    |    |                                                                                    |                                                                                                                                                                                                                                                                   | factor homolog,<br>putative |  |
| Plasmodium falciparum | Plasmodium | 6  | 18 | 24 | Plasmodium falciparum-glucose-6-phosphate dehydrogenase-6-phospho-gluconolactonase | inhibitors of Plasmodium falciparum Glucose-6-phosphate dehydrogenase 6-phosphogluconolactonase                                                                                                                                                                   |                             |  |
| Plasmodium falciparum | Plasmodium | 14 | 10 | 24 | 1828                                                                               | Inhibitors of Plasmodium falciparum proliferation. This summary is written for the purposes of summarizing the status of the profiling of the Plasmodium falciparum strains. The average PubChem activity score from different strains is used for each compound. |                             |  |
| Plasmodium falciparum | Plasmodium | 27 | 12 | 39 | 1876                                                                               | inhibitors of proliferation of Plasmodium falciparum line 3D7                                                                                                                                                                                                     |                             |  |
| Plasmodium falciparum | Plasmodium | 0  | 1  | 1  | 449703                                                                             | inhibitors of proliferation of Plasmodium falciparum line 3D7                                                                                                                                                                                                     |                             |  |
| Plasmodium falciparum | Plasmodium | 13 | 13 | 26 | 1815                                                                               | inhibitors of proliferation of Plasmodium falciparum line 7G8                                                                                                                                                                                                     |                             |  |
| Plasmodium falciparum | Plasmodium | 0  | 1  | 1  | 504316                                                                             | inhibitors of proliferation of Plasmodium falciparum line 7G8                                                                                                                                                                                                     |                             |  |
| Plasmodium falciparum | Plasmodium | 0  | 1  | 1  | 504320                                                                             | inhibitors of proliferation of Plasmodium falciparum line CP250                                                                                                                                                                                                   |                             |  |
| Plasmodium falciparum | Plasmodium | 11 | 4  | 15 | 1877                                                                               | inhibitors of proliferation of Plasmodium falciparum line D10                                                                                                                                                                                                     |                             |  |
| Plasmodium falciparum | Plasmodium | 12 | 2  | 14 | 1882                                                                               | inhibitors of proliferation of Plasmodium falciparum line Dd2                                                                                                                                                                                                     |                             |  |
| Plasmodium falciparum | Plasmodium | 0  | 2  | 2  | 504314                                                                             | inhibitors of proliferation of Plasmodium falciparum line Dd2                                                                                                                                                                                                     |                             |  |
| Plasmodium falciparum | Plasmodium | 0  | 1  | 1  | 1159567                                                                            | inhibitors of proliferation of Plasmodium falciparum line Dd2                                                                                                                                                                                                     |                             |  |
| Plasmodium falciparum | Plasmodium | 27 | 15 | 42 | 1816                                                                               | inhibitors of proliferation of Plasmodium falciparum line GB4                                                                                                                                                                                                     |                             |  |
| Plasmodium falciparum | Plasmodium | 0  | 3  | 3  | 504315                                                                             | inhibitors of proliferation of Plasmodium falciparum line GB4                                                                                                                                                                                                     |                             |  |
| Plasmodium falciparum | Plasmodium | 27 | 12 | 39 | 1886                                                                               | inhibitors of proliferation of Plasmodium falciparum line HB3                                                                                                                                                                                                     |                             |  |
| Plasmodium falciparum | Plasmodium | 2  | 0  | 2  | 504318                                                                             | inhibitors of proliferation of Plasmodium falciparum line HB3                                                                                                                                                                                                     |                             |  |
| Plasmodium falciparum | Plasmodium | 0  |    | 0  | 743327                                                                             | inhibitors of proliferation of Plasmodium falciparum line HB3                                                                                                                                                                                                     |                             |  |
| Plasmodium falciparum | Plasmodium | 27 | 27 | 54 | 1883                                                                               | inhibitors of proliferation of Plasmodium falciparum line W2                                                                                                                                                                                                      |                             |  |
| Plasmodium falciparum | Plasmodium | 0  | 21 | 21 | 449704                                                                             | inhibitors of proliferation of Plasmodium falciparum line W2                                                                                                                                                                                                      |                             |  |
| Plasmodium falciparum | Plasmodium | 0  | 0  | 0  | 743274                                                                             | inhibitors of the Plasmodium falciparum M17 Leucine Aminopeptidase (M17LAP)                                                                                                                                                                                       |                             |  |
| Plasmodium falciparum | Plasmodium | 6  | 11 | 17 | Plasmodium falciparum-M17 leucyl aminopeptidase                                    | inhibitors of the Plasmodium falciparum M17 Leucine Aminopeptidase (PFM17LAP)                                                                                                                                                                                     |                             |  |
| Plasmodium falciparum | Plasmodium | 0  | 3  | 3  | 624175                                                                             | inhibitors of the Plasmodium falciparum M17 Leucine Aminopeptidase (PFM17LAP)                                                                                                                                                                                     |                             |  |

|                       |            |    |    |    |                                                                          |                                                                                                                                                                                                                                                                            |                                 |            |
|-----------------------|------------|----|----|----|--------------------------------------------------------------------------|----------------------------------------------------------------------------------------------------------------------------------------------------------------------------------------------------------------------------------------------------------------------------|---------------------------------|------------|
| Plasmodium falciparum | Plasmodium | 0  | 2  | 2  | 588679                                                                   | inhibitors of the Plasmodium falciparum M17 Leucine Aminopeptidase (PFM17LAP)                                                                                                                                                                                              | M17 leucyl aminopeptidase       | LAP        |
| Plasmodium falciparum | Plasmodium | 11 | 22 | 33 | 492975                                                                   | inhibitors of the Plasmodium falciparum M18 Alanyl Aminopeptidase (PfM18AAP)                                                                                                                                                                                               | M18 aspartyl aminopeptidase     | PfM18AAP   |
| Plasmodium falciparum | Plasmodium | 0  | 7  | 7  | 624177                                                                   | inhibitors of the Plasmodium falciparum M18 Aspartyl Aminopeptidase (PFM18AAP)                                                                                                                                                                                             |                                 |            |
| Plasmodium falciparum | Plasmodium | 0  | 2  | 2  | 588678                                                                   | inhibitors of the Plasmodium falciparum M18 Aspartyl Aminopeptidase (PFM18AAP)                                                                                                                                                                                             | M18 aspartyl aminopeptidase     | PfM18AAP   |
| Plasmodium falciparum | Plasmodium | 0  | 1  | 1  | 720736                                                                   | inhibitors of the Plasmodium falciparum M18 Aspartyl Aminopeptidase (PFM18AAP)                                                                                                                                                                                             | M18 aspartyl aminopeptidase     |            |
| Plasmodium falciparum | Plasmodium | 9  | 20 | 29 | Plasmodium falciparum-M18 aspartyl aminopeptidase                        | inhibitors of the Plasmodium falciparum M18 Aspartyl Aminopeptidase (PFM18AAP).                                                                                                                                                                                            |                                 |            |
| Plasmodium falciparum | Plasmodium | 6  | 19 | 25 | 2170                                                                     | inhibitors of the Plasmodium falciparum M18 Aspartyl Aminopeptidase (PFM18AAP).                                                                                                                                                                                            | M18 aspartyl aminopeptidase     | PfM18AAP   |
| Plasmodium falciparum | Plasmodium | 8  | 14 | 22 | 492974                                                                   | inhibitors of the Plasmodium falciparum M18 Aspartyl Aminopeptidase (PFM18AAP).                                                                                                                                                                                            | M18 aspartyl aminopeptidase     | PfM18AAP   |
| Plasmodium falciparum | Plasmodium | 0  | 7  | 7  | 624176                                                                   | inhibitors of the Plasmodium falciparum M1AAP (PFM1AAP)                                                                                                                                                                                                                    |                                 |            |
| Plasmodium falciparum | Plasmodium | 0  | 2  | 2  | 588680                                                                   | inhibitors of the Plasmodium falciparum M1AAP (PFM1AAP)                                                                                                                                                                                                                    | M1-family alanyl aminopeptidase | MAL13P1.56 |
| Plasmodium falciparum | Plasmodium | 2  | 17 | 19 | 492973                                                                   | inhibitors of the Plasmodium falciparum M7 Leucine Aminopeptidase (PfM17LAP)                                                                                                                                                                                               | M17 leucyl aminopeptidase       | LAP        |
| Plasmodium falciparum | Plasmodium | 1  | 13 | 14 | 492977                                                                   | inhibitors of the Plasmodium falciparum M7 Leucine Aminopeptidase (PfM17LAP)                                                                                                                                                                                               | M17 leucyl aminopeptidase       | LAP        |
| Plasmodium falciparum | Plasmodium | 0  | 2  | 2  | Plasmodium falciparum-m1-family aminopeptidase                           | inhibitors of the Plasmodium_falciparum-m1-family_aminopeptidase                                                                                                                                                                                                           |                                 |            |
| Plasmodium falciparum | Plasmodium | 0  | 0  | 0  | 652047                                                                   | inhibitory activity of small molecule on Plasmodium flaciparum (3D7 strain) survival                                                                                                                                                                                       |                                 |            |
| Plasmodium falciparum | Plasmodium | 1  | 0  | 1  | 652041                                                                   | inhibitory activity of small molecule on Plasmodium flaciparum (HB3 strain) survival                                                                                                                                                                                       |                                 |            |
| Plasmodium falciparum | Plasmodium | 0  | 8  | 8  | 602156                                                                   | Liver Stage Dataset: Malariabox Annotation. Most malaria drug development focuses on parasite stages detected in red-blood cells even though to achieve eradication next-generation drugs active against both erythrocytic and exo-erythrocytic forms would be preferable. |                                 |            |
| Plasmodium falciparum | Plasmodium | 0  | 7  | 7  | 602118                                                                   | Liver Stage Dataset: Malariabox Annotation. Most malaria drug development focuses on parasite stages detected in red-blood cells even though to achieve eradication next-generation drugs active against both erythrocytic and exo-erythrocytic forms would be preferable. |                                 |            |
| Plasmodium falciparum | Plasmodium | 6  | 14 | 20 | Plasmodium falciparum-Glutathione metabolism (Plasmodium falciparum 3D7) | Plasmodium_falciparum-Glutathione_metabolism_(Plasmodium_falciparum_3D7)                                                                                                                                                                                                   |                                 |            |
