# Supplementary material for: Combined In Vitro Studies and in Silico Target Fishing for the Evaluation of the Biological Activities of Diphylleia cymosa and Podophyllum hexandrum
Source: MDPI journal article supplement (doi:10.3390/molecules23123303), 2018-12-13
Supplement: s1 [file s1]

31\_07\_2018\_PM1

3: Diode Array  
Range: 4.953e+1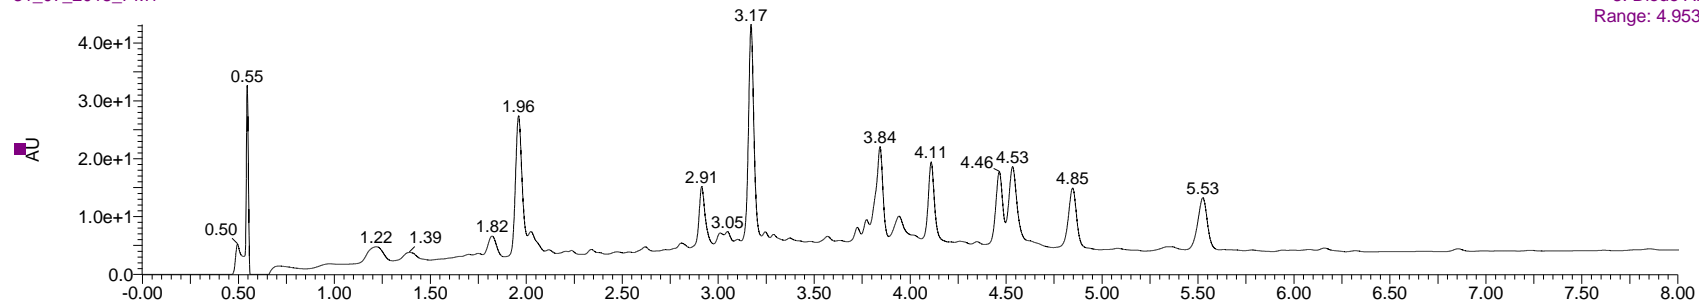

31\_07\_2018\_PM1

2: Scan ES-  
TIC  
1.98e8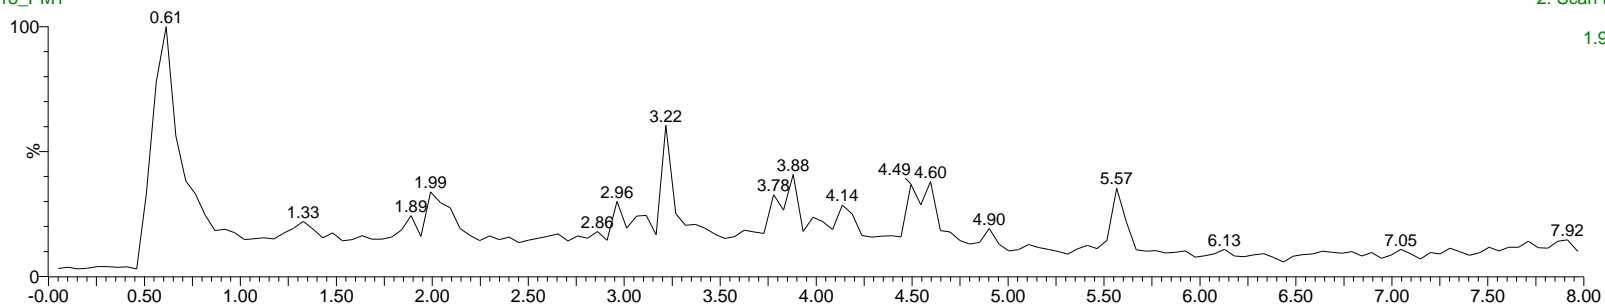

31\_07\_2018\_PM1

1: Scan ES+  
TIC  
3.49e9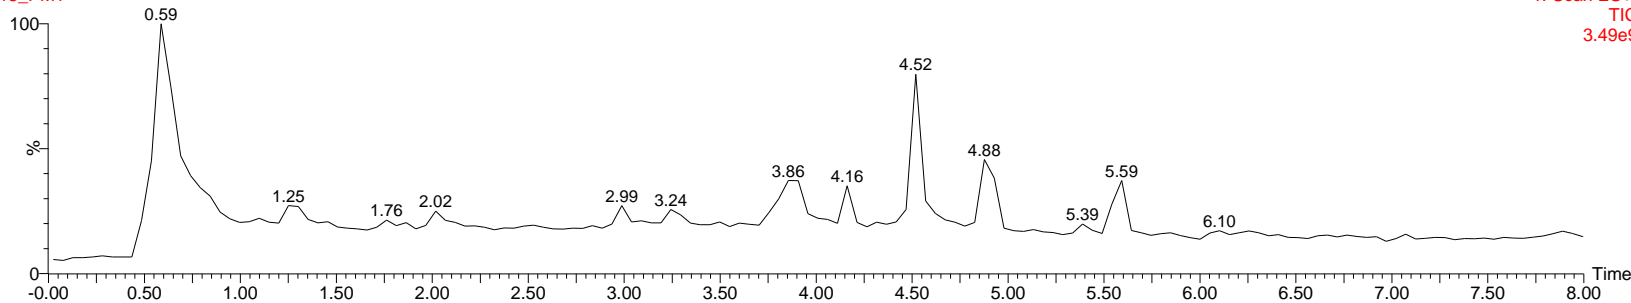

**Figure S1.** Chromatographic profiles obtained by UPLC for the EtOH extract of leaves from *D. cymosa* with detection by DAD and ESI-MS in the negative and positive ionization modes.

31\_07\_2018\_PM2

3: Diode Array  
Range: 1.184e+2

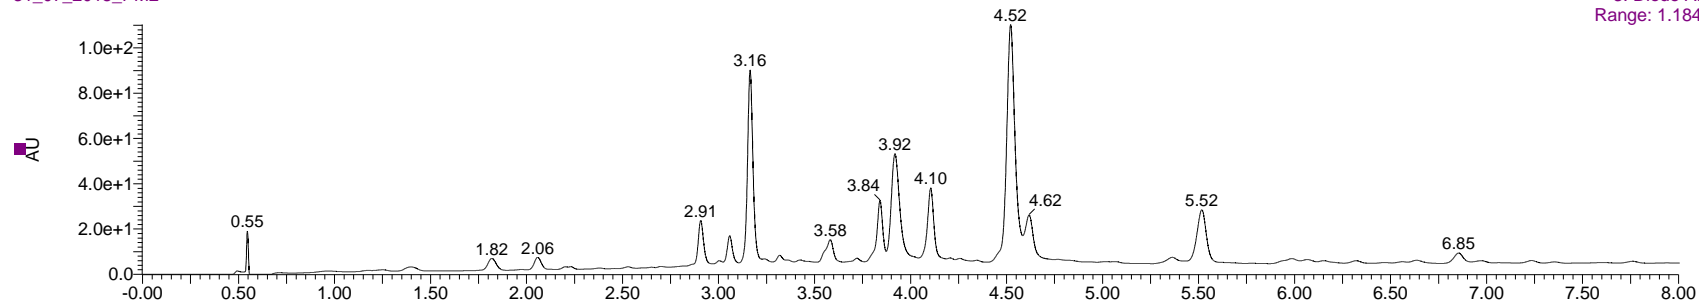

31\_07\_2018\_PM2

2: Scan ES-  
TIC  
2.06e8

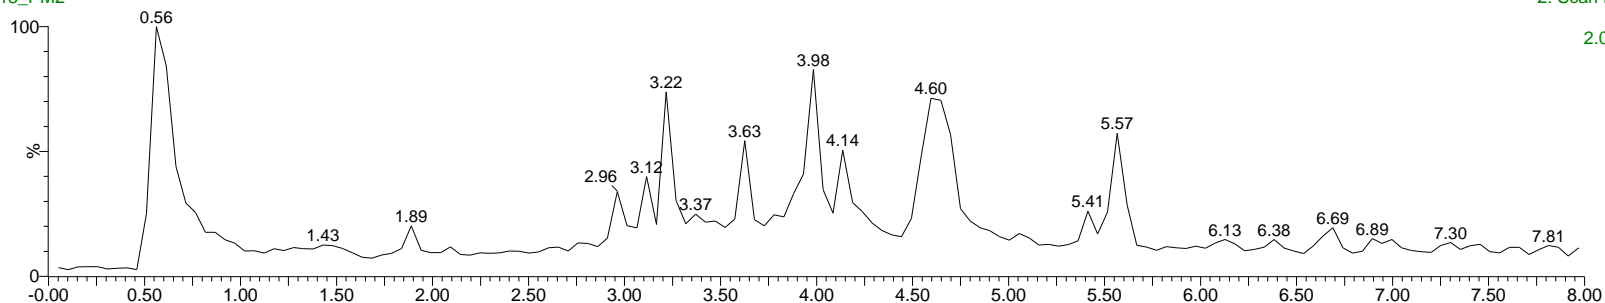

31\_07\_2018\_PM2

1: Scan ES+  
TIC  
2.60e9

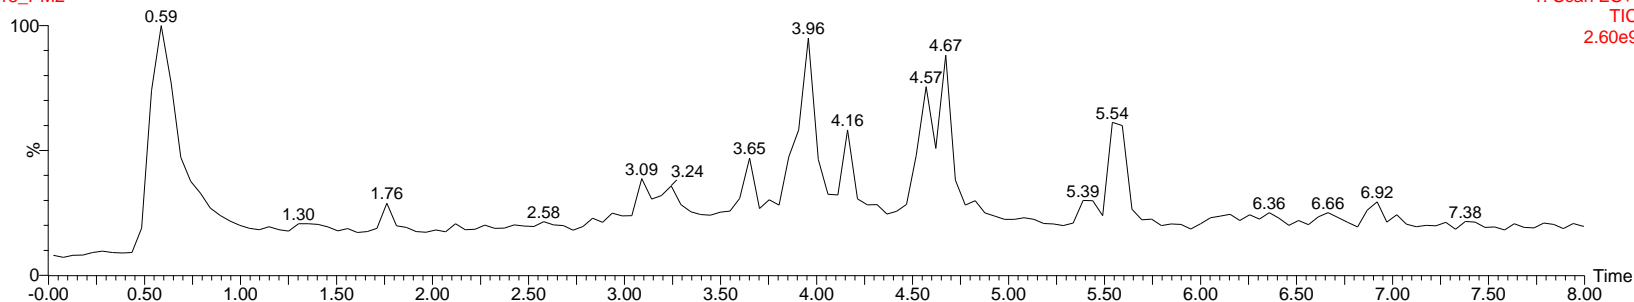

**Figure S2.** Chromatographic profiles obtained by UPLC for the EtOH extract of roots from *D. cymosa* with detection by DAD and ESI-MS in the negative and positive ionization modes.

31\_07\_2018\_PM3

3: Diode Array  
Range: 1.77e+2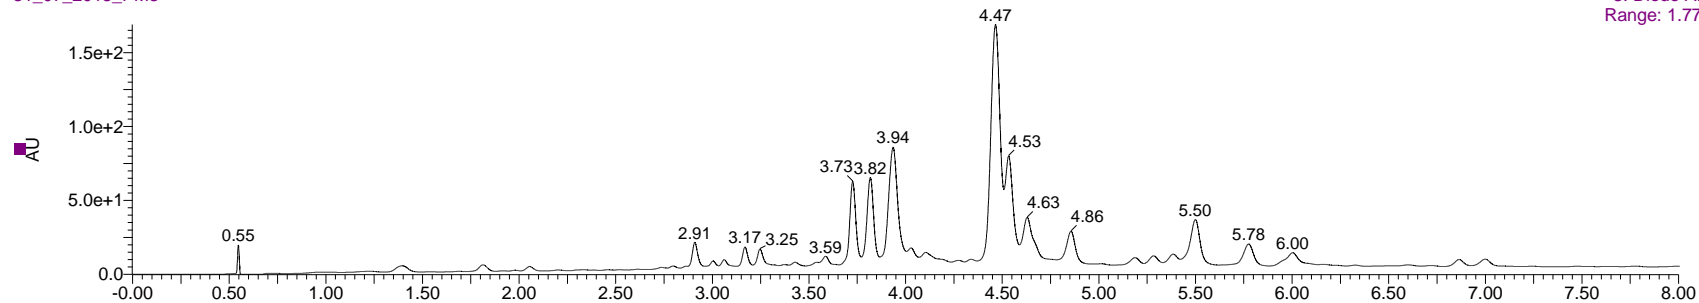

31\_07\_2018\_PM3

2: Scan ES-  
TIC  
3.14e8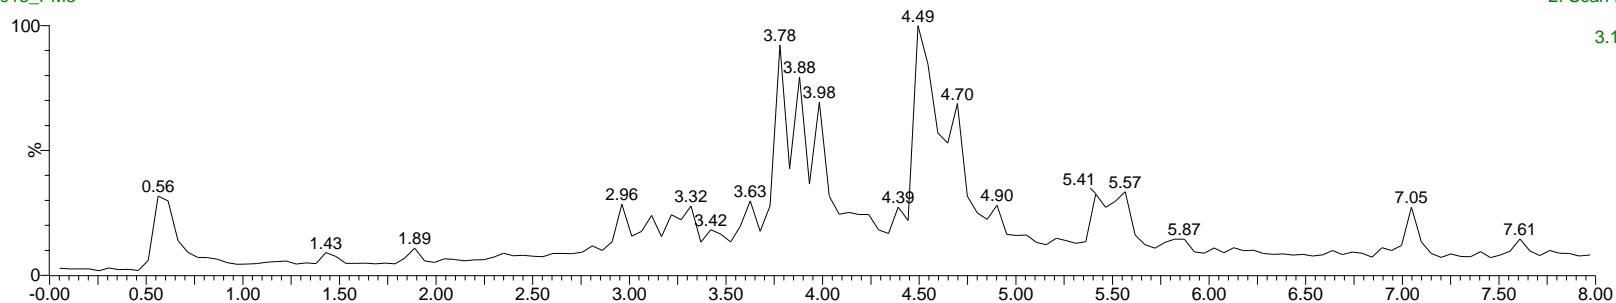

31\_07\_2018\_PM3

1: Scan ES+  
TIC  
6.76e9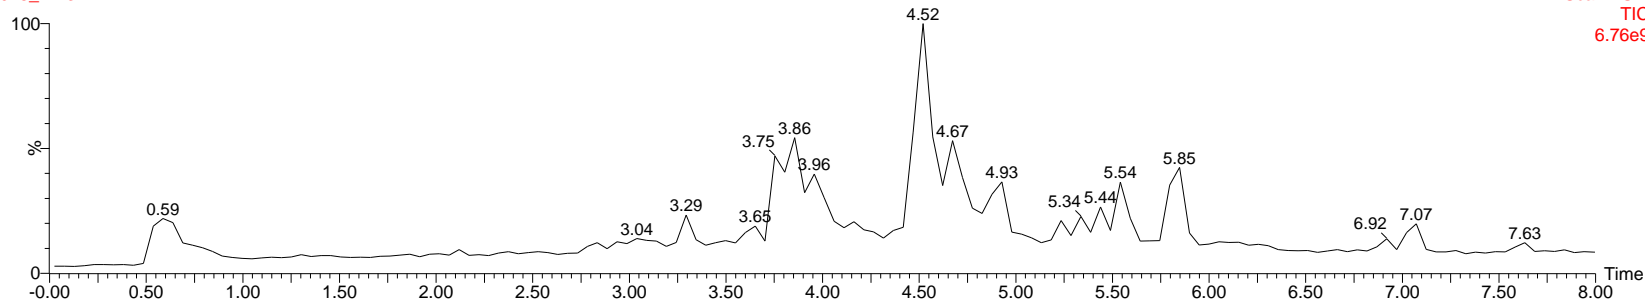

**Figure S3.** Chromatographic profiles obtained by UPLC for the EtOH extract of rhizomes and roots from *P. hexandrum* with detection by DAD and ESI-MS in the negative and positive ionization modes.

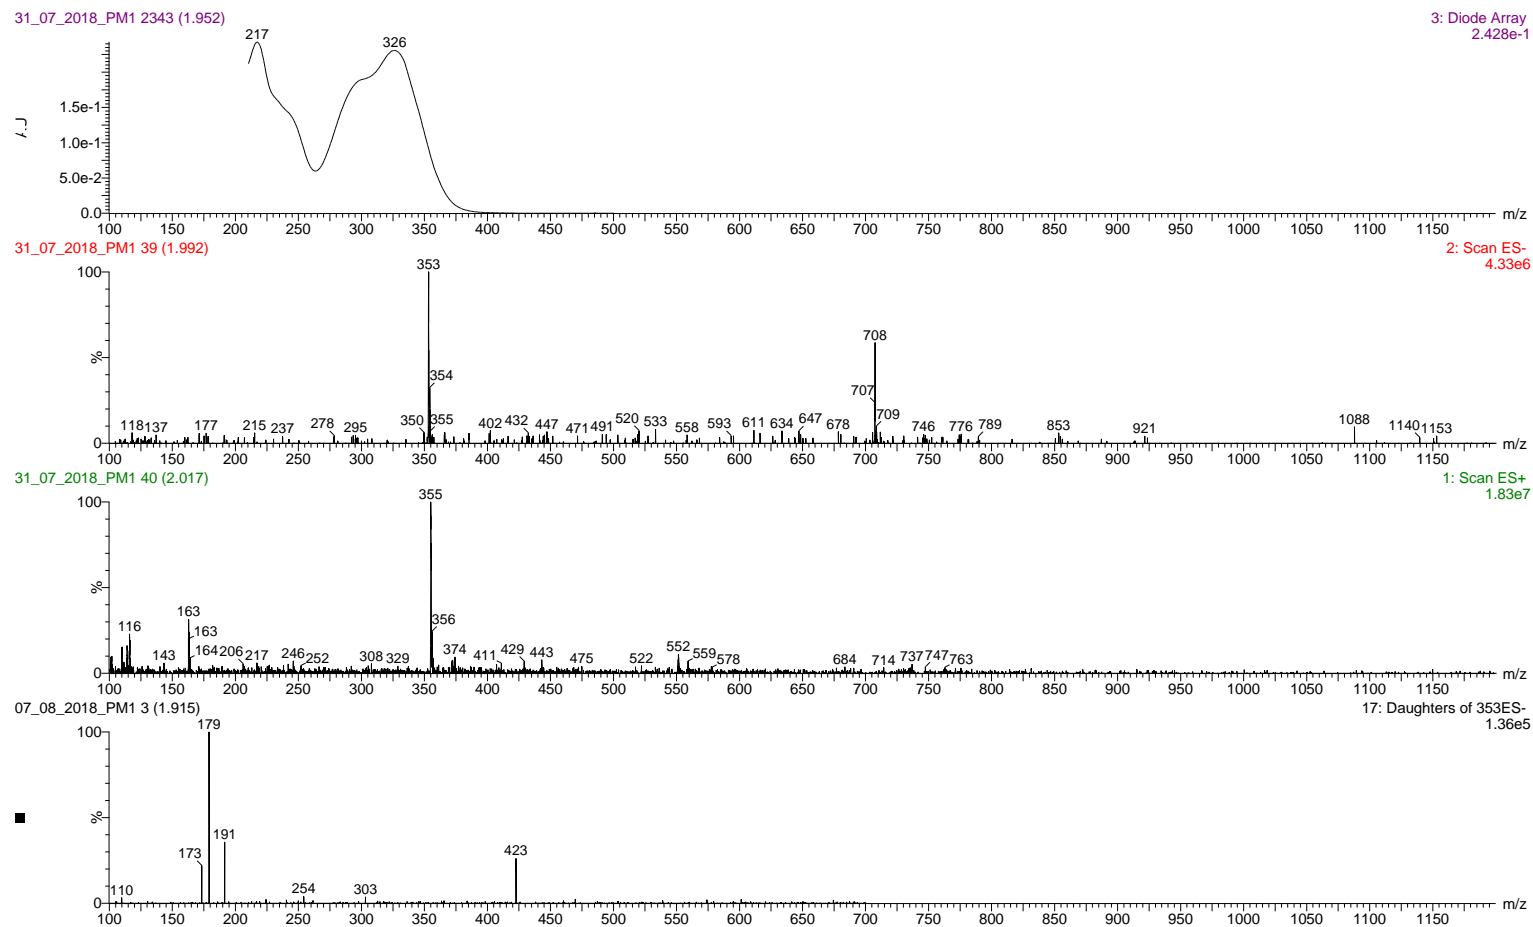

**Figure S4.** DAD, ESI-MS in the negative and positive ionization modes, and ESI-MS/MS spectra obtained online by UPLC-DAD-ESI-MS/MS for chromatographic peak 1.

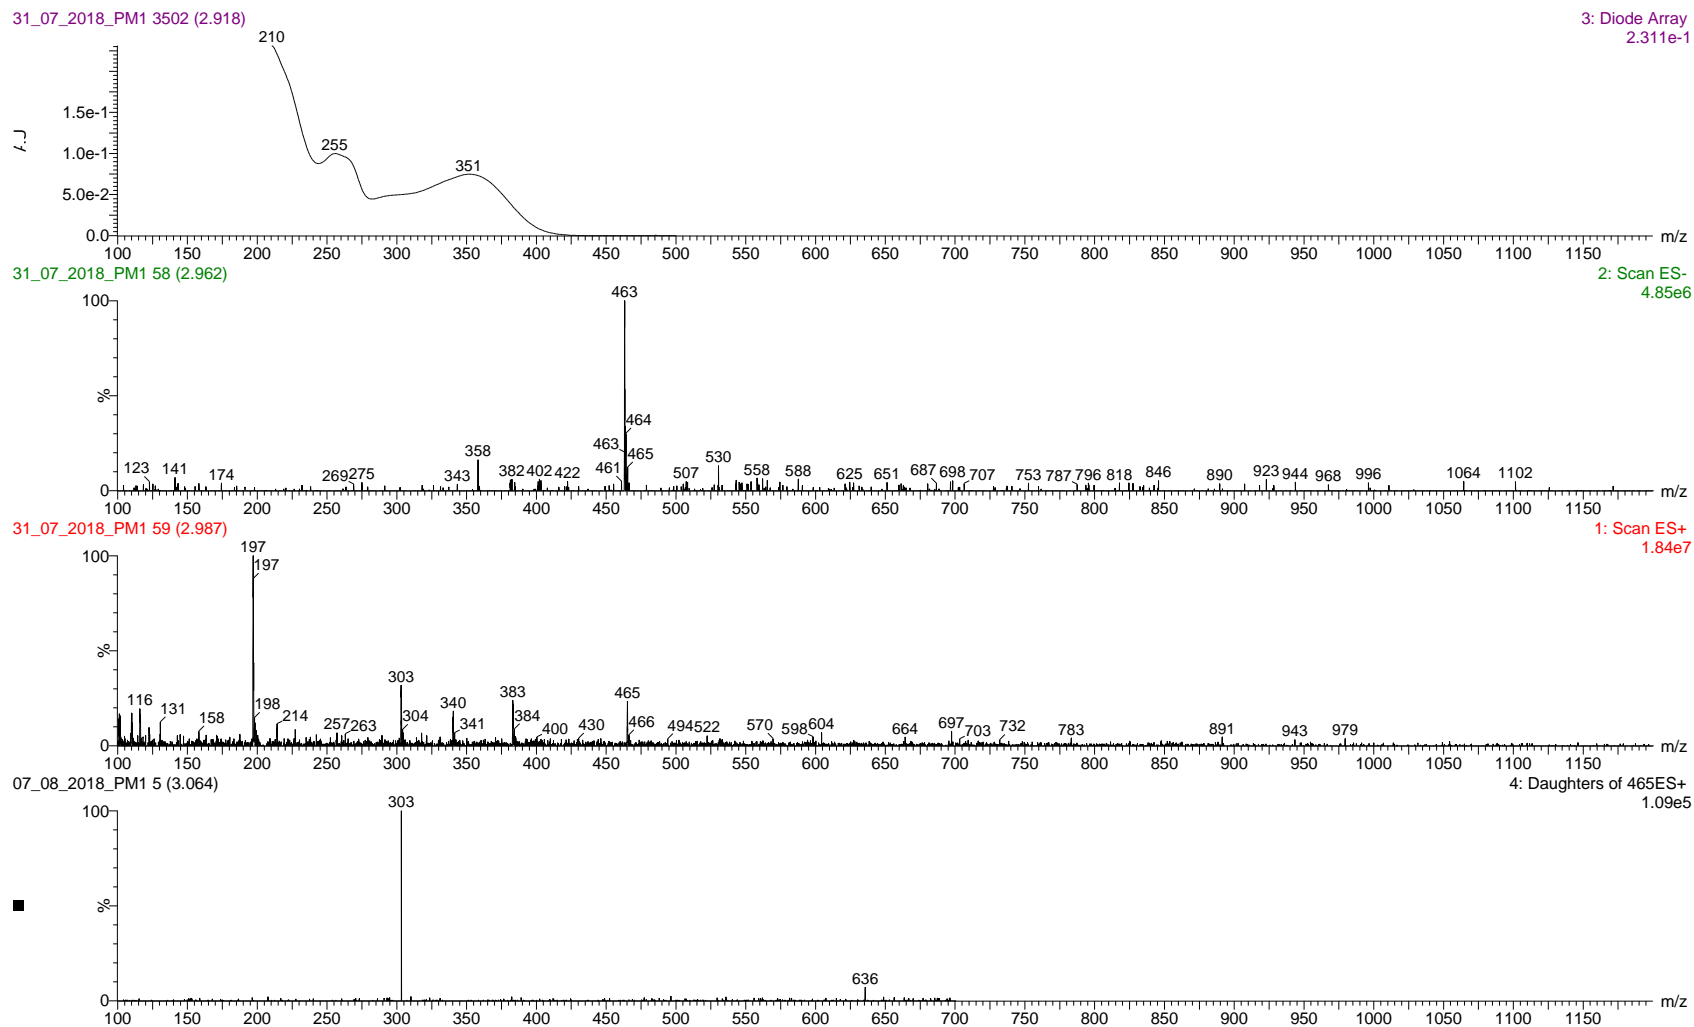

**Figure S5.** DAD, ESI-MS in the negative and positive ionization modes, and ESI-MS/MS spectra obtained online by UPLC-DAD-ESI-MS/MS for chromatographic peak 2.

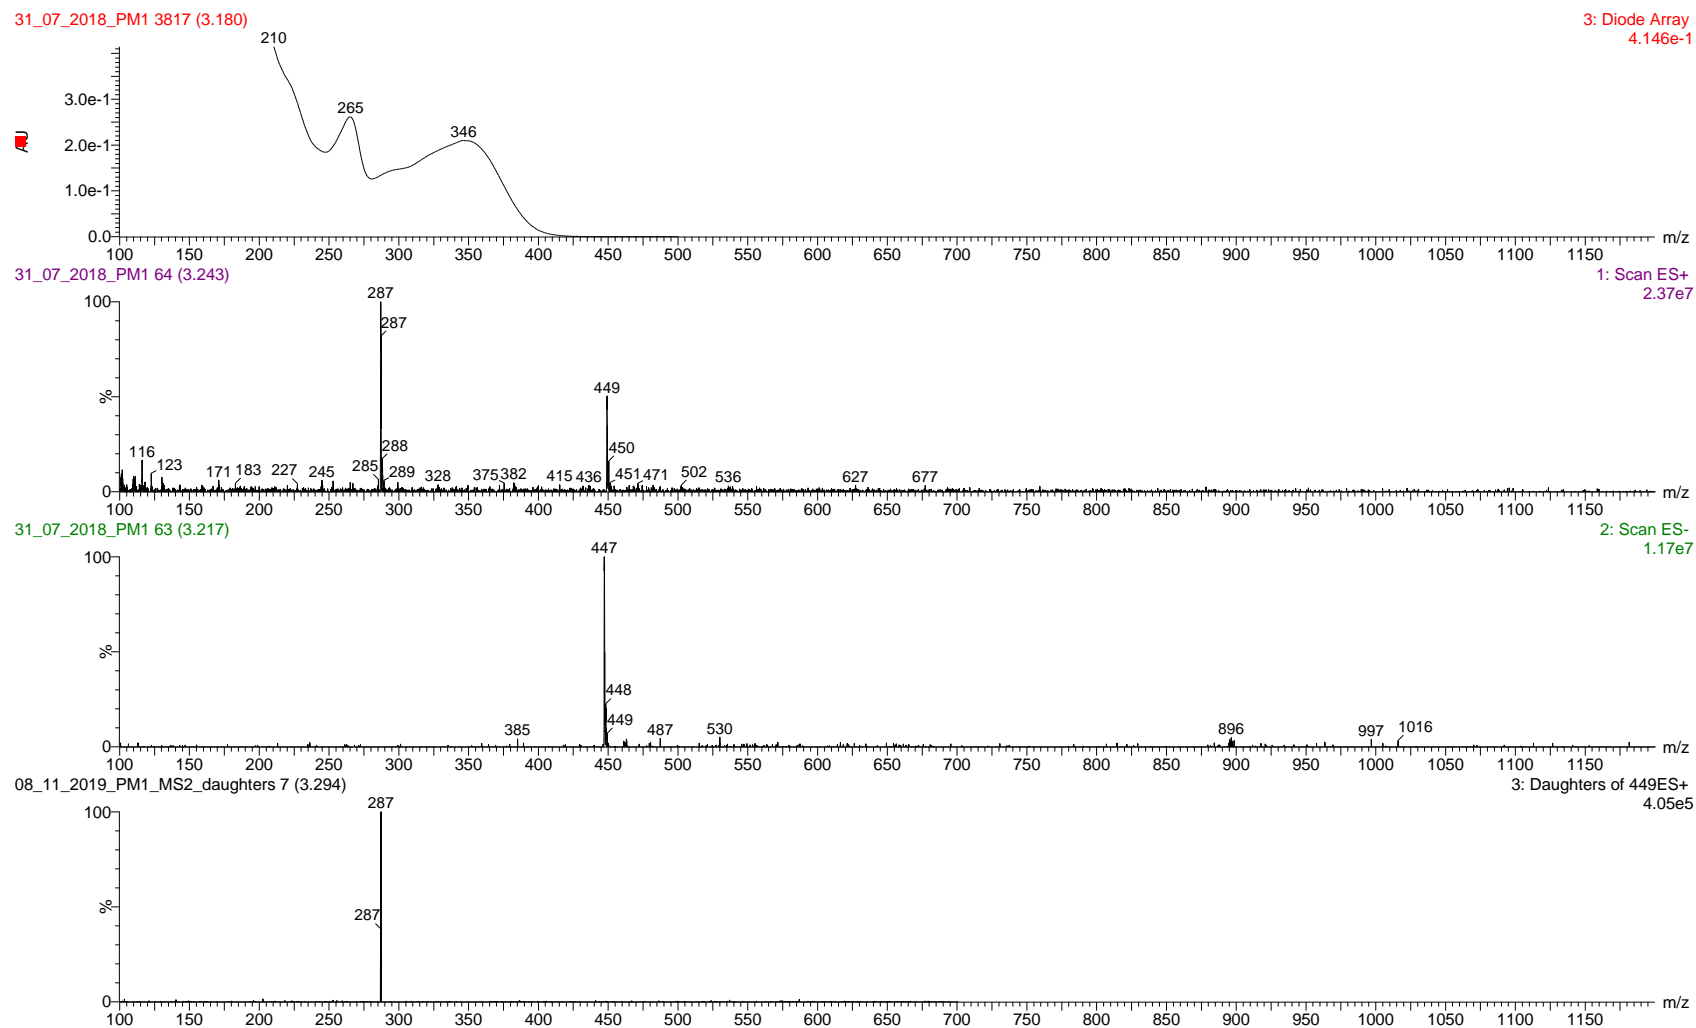

**Figure S6.** DAD, ESI-MS in the negative and positive ionization modes and ESI-MS/MS spectra obtained online by UPLC-DAD-ESI-MS/MS for chromatographic peak 3.

13\_11\_2018\_PM3\_MS2 4474 (3.727)

7: Diode Array  
2.073

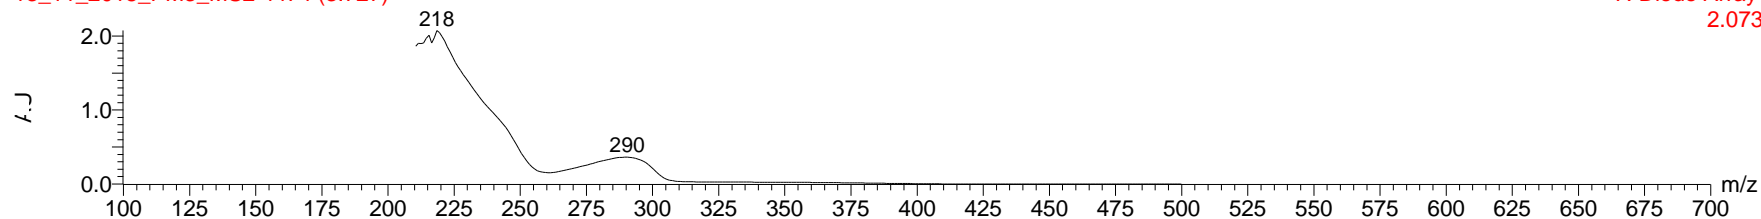

13\_11\_2011\_PM3 74 (3.779)

2: Scan ES-  
2.30e7

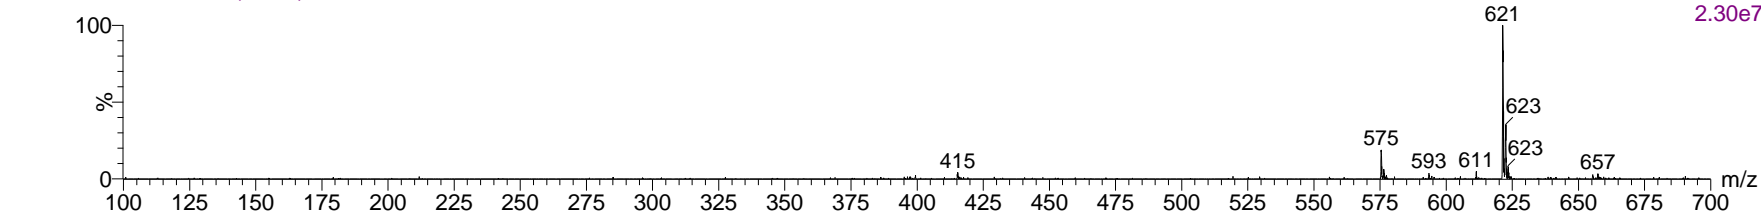

31\_07\_2018\_PM3 74 (3.753)

1: Scan ES+  
1.26e8

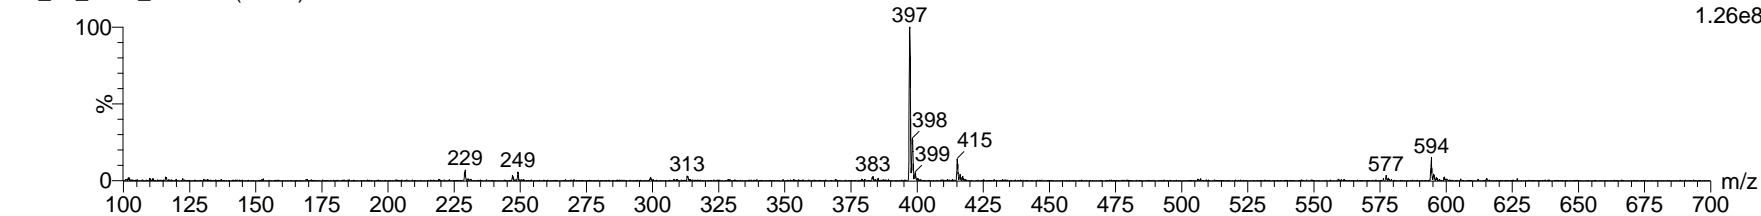

13\_11\_2018\_PM3\_MS2 25 (3.702)

1: Daughters of 577ES+  
1.68e5

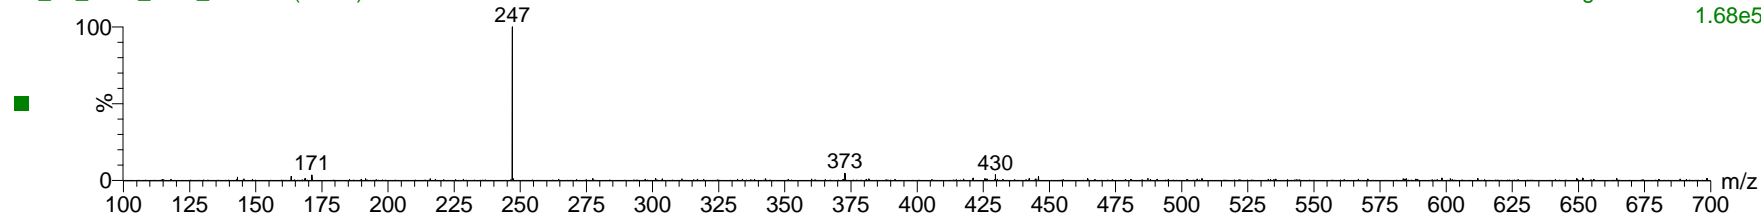

**Figure S7.** DAD, ESI-MS in the negative and positive ionization modes, and ESI-MS/MS spectra obtained online by UPLC-DAD-ESI-MS/MS for chromatographic peak 4.

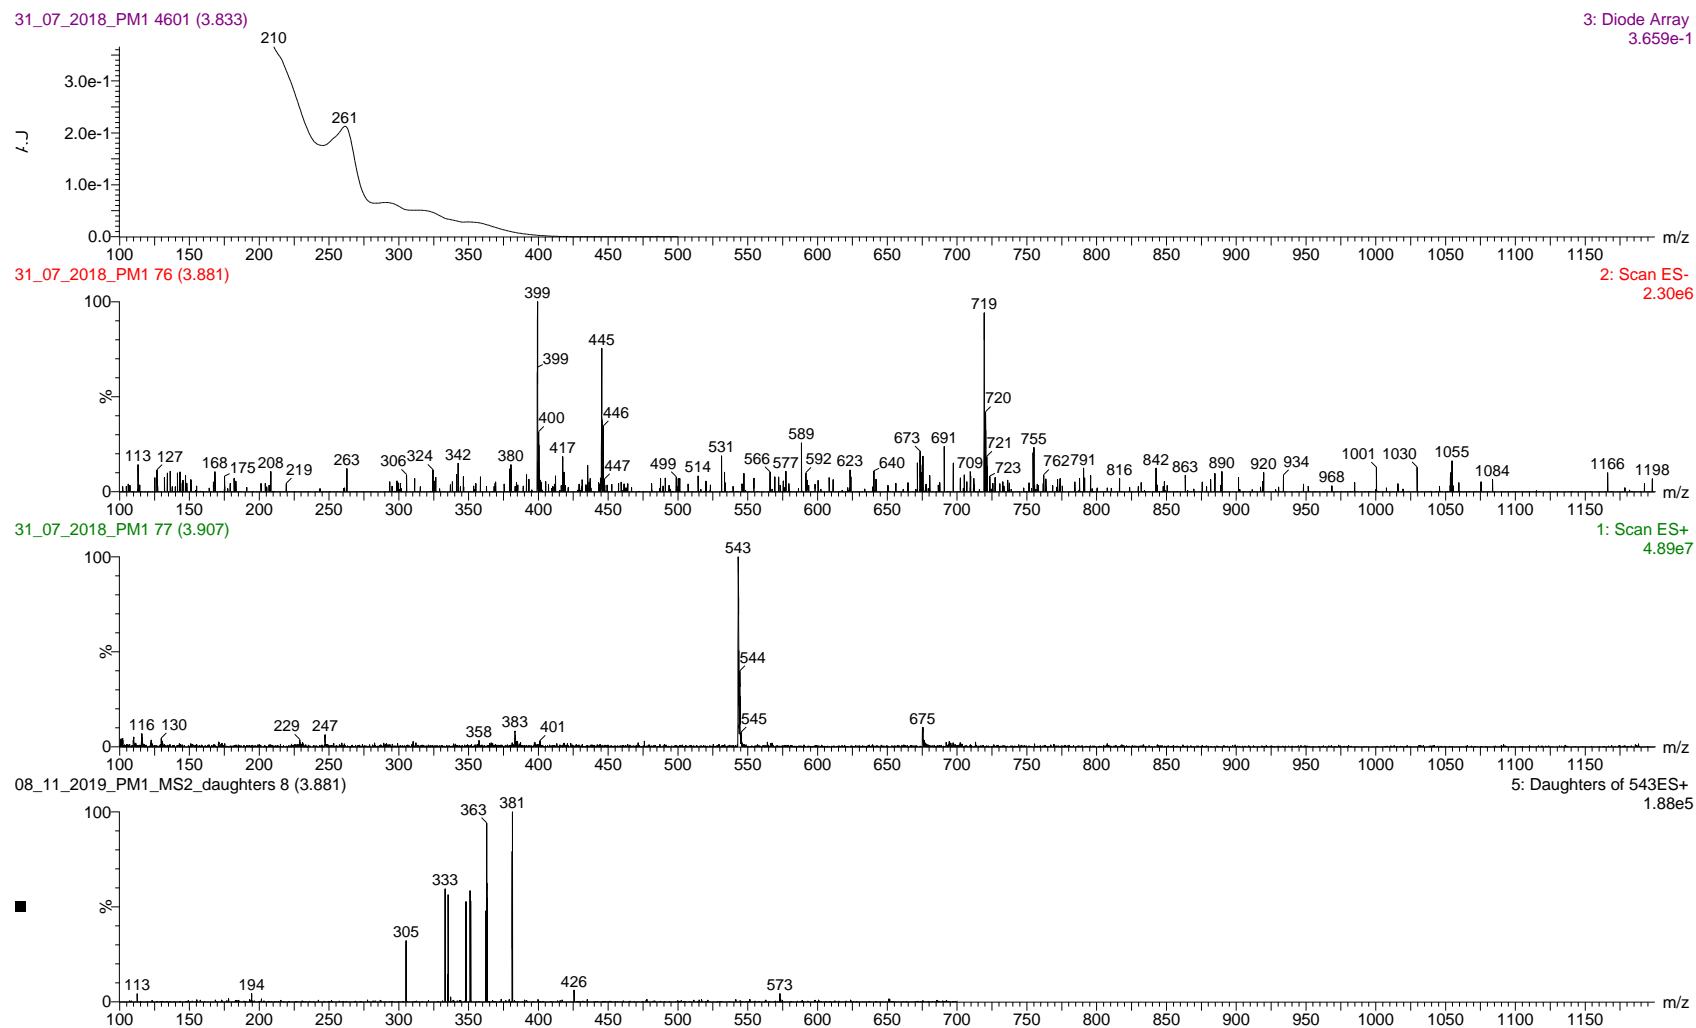

**Figure S8.** DAD, ESI-MS in the negative and positive ionization modes, and ESI-MS/MS spectra obtained online by UPLC-DAD-ESI-MS/MS for chromatographic peak 5.

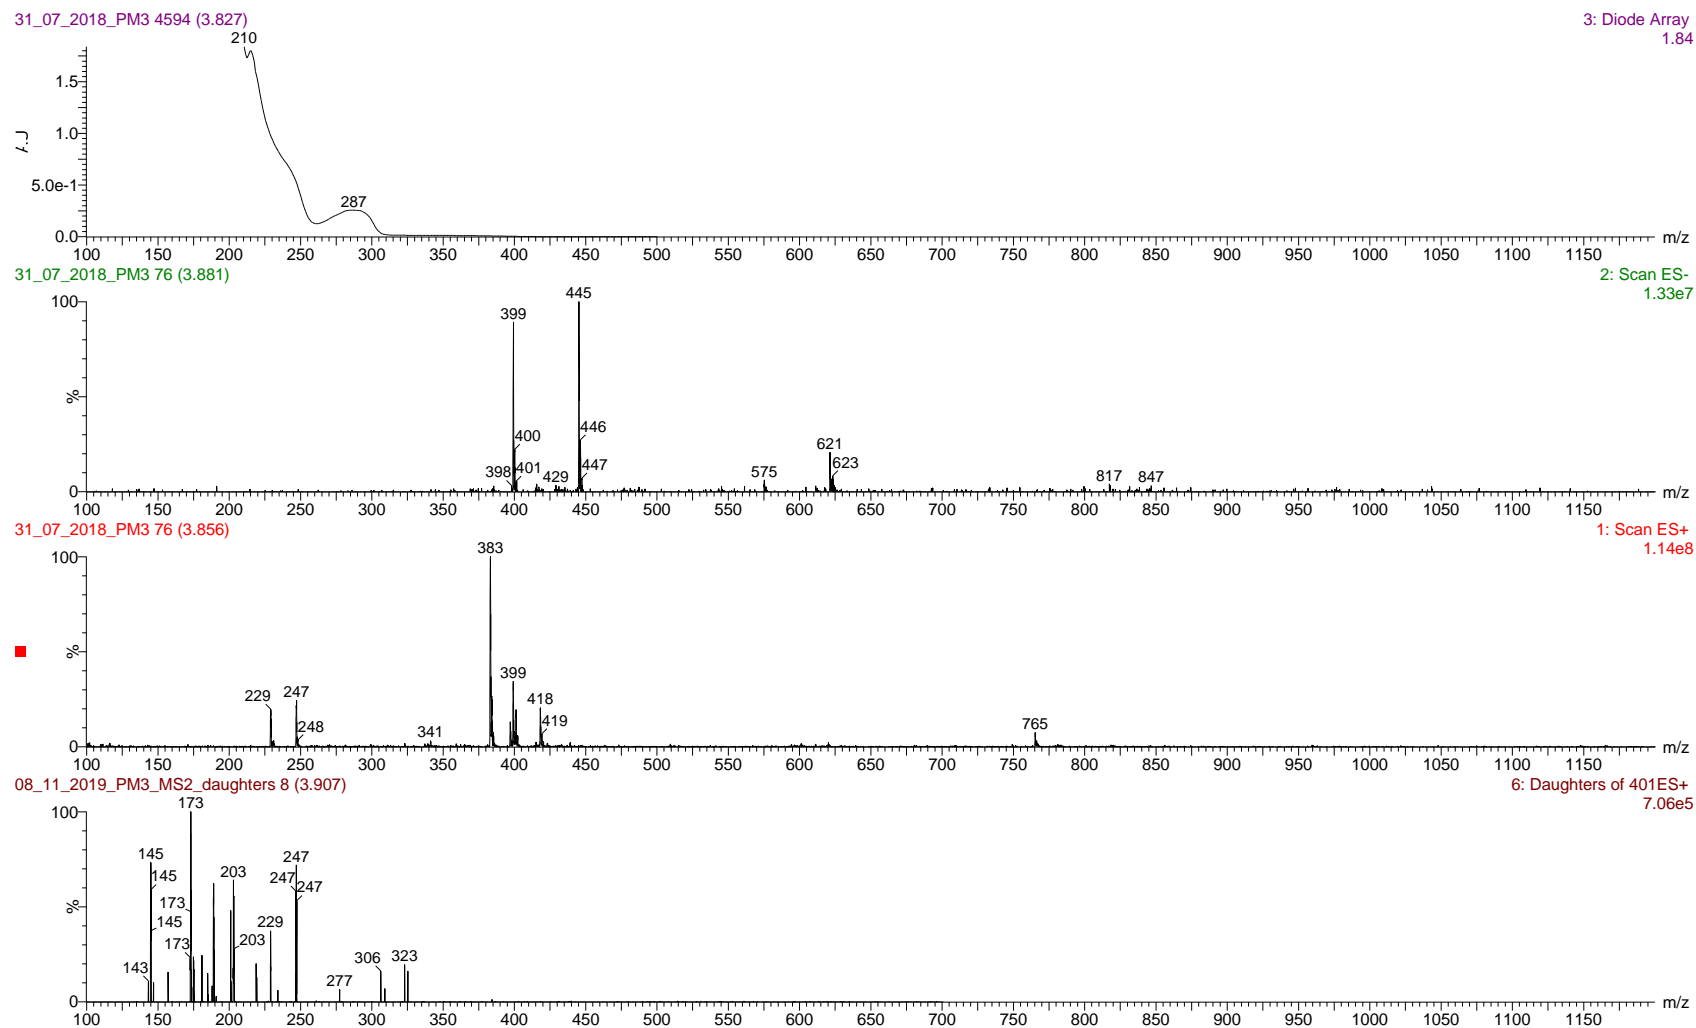

**Figure S9.** DAD, ESI-MS in the negative and positive ionization modes, and ESI-MS/MS spectra obtained online by UPLC-DAD-ESI-MS/MS for chromatographic peak 5'.

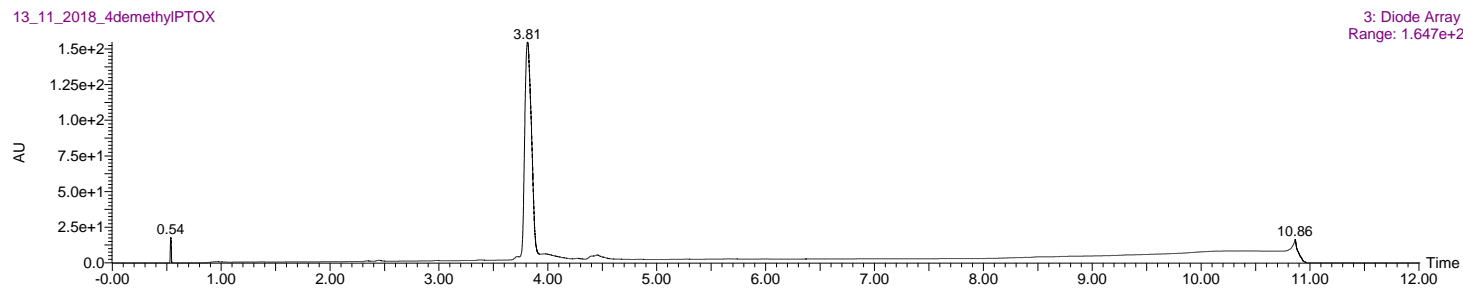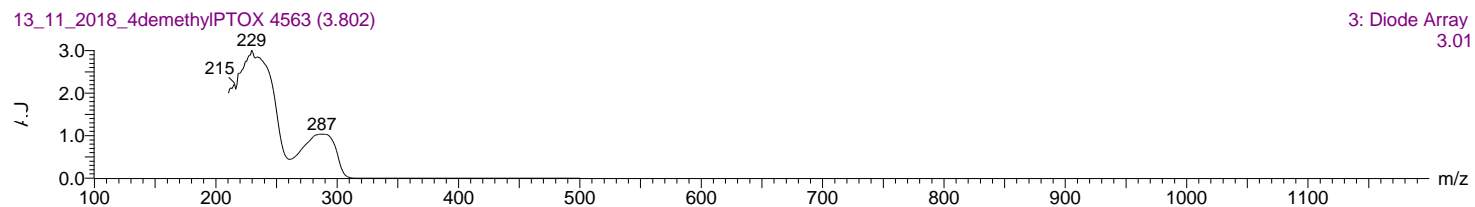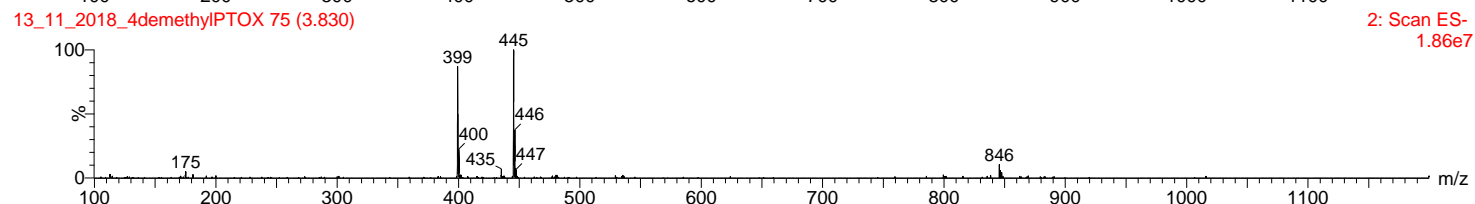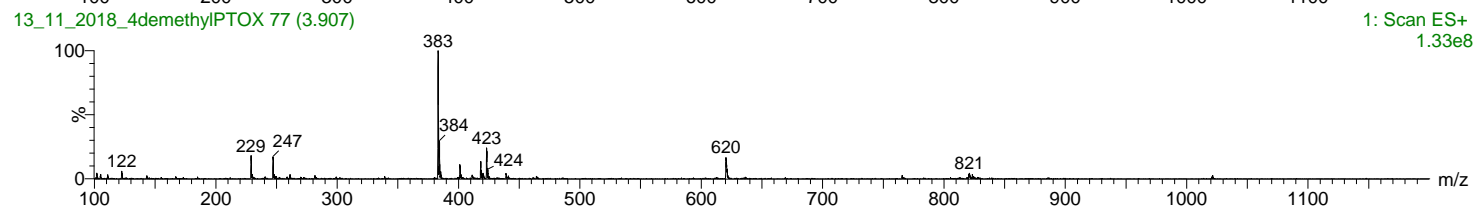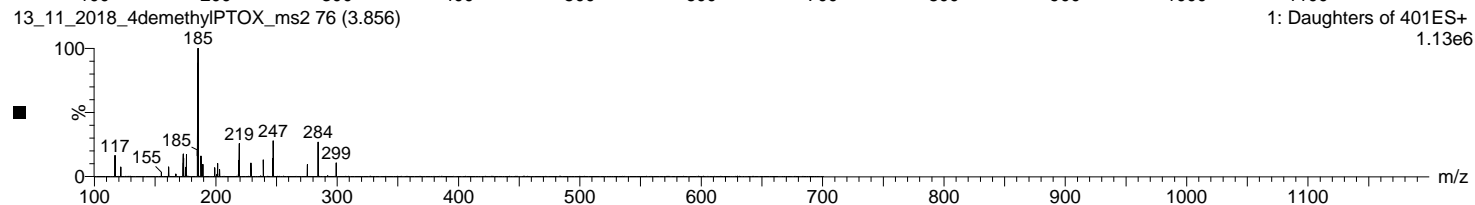

**S10.** DAD, ESI-MS in the negative and positive ionization modes, and ESI-MS/MS spectra obtained online by UPLC-DAD-ESI-MS/MS for 4'-demethylpodophyllotoxin.

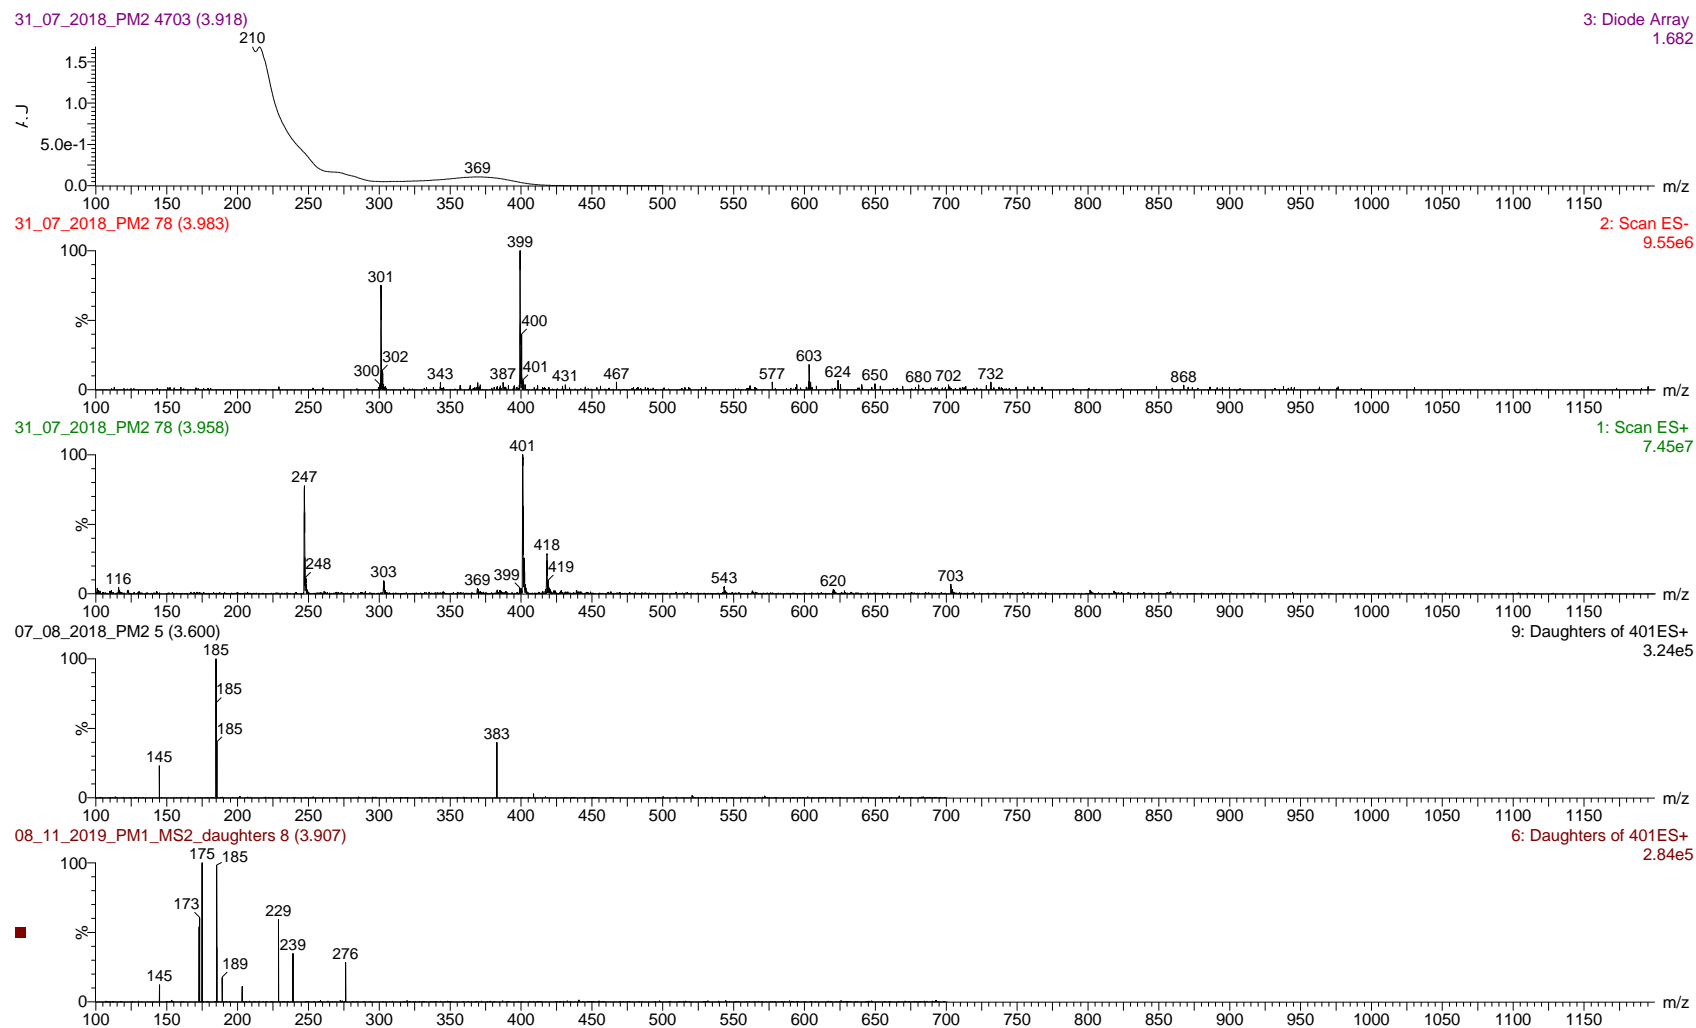

**Figure S11.** DAD, ESI-MS in the negative and positive ionization modes, and ESI-MS/MS spectra obtained online by UPLC-DAD-ESI-MS/MS for chromatographic peak 6.

31\_07\_2018\_alfa-peltatina

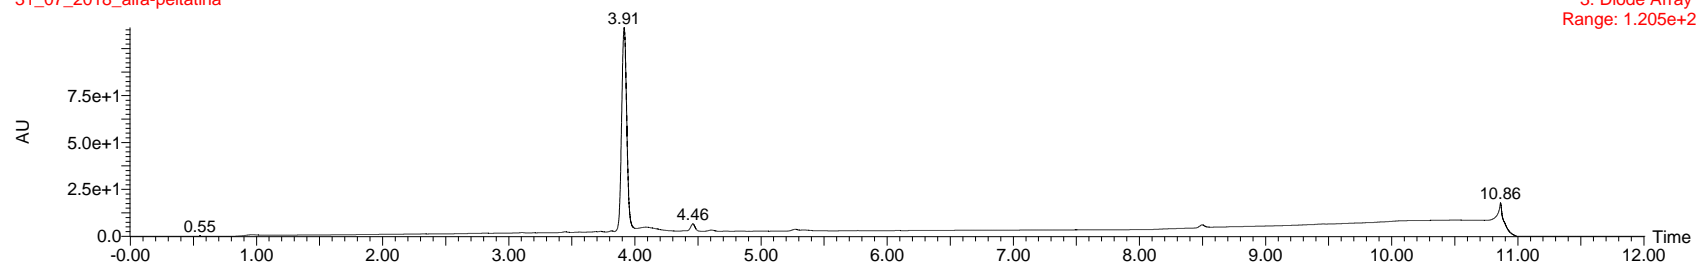

31\_07\_2018\_alfa-peltatina 4717 (3.930)

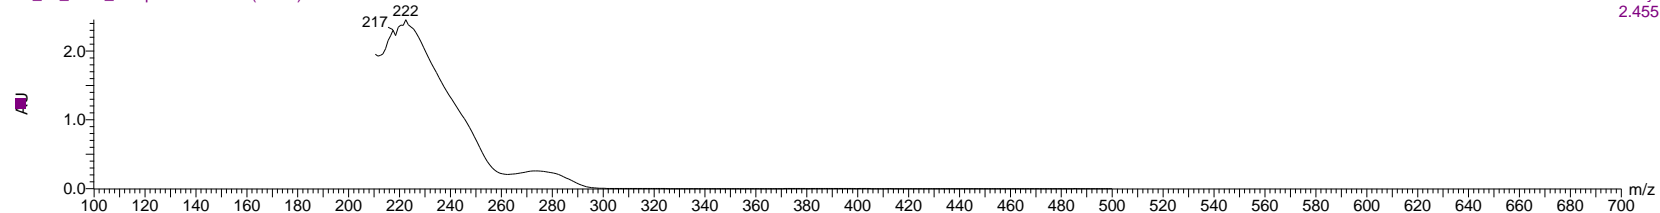

31\_07\_2018\_alfa-peltatina 78 (3.983)

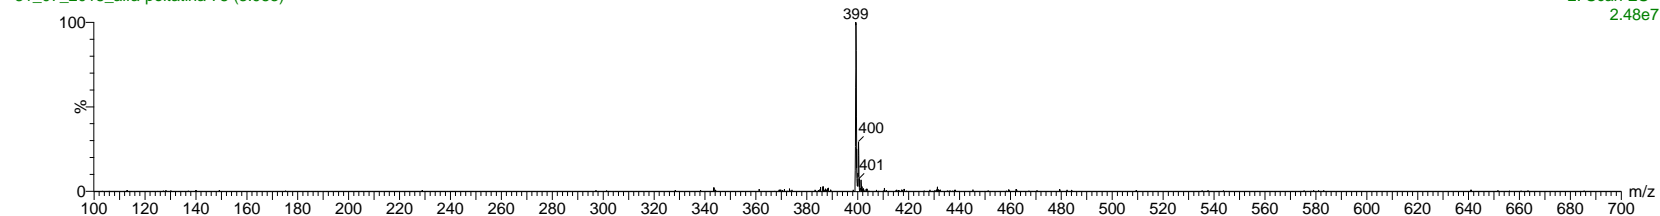

31\_07\_2018\_alfa-peltatina 78 (3.958)

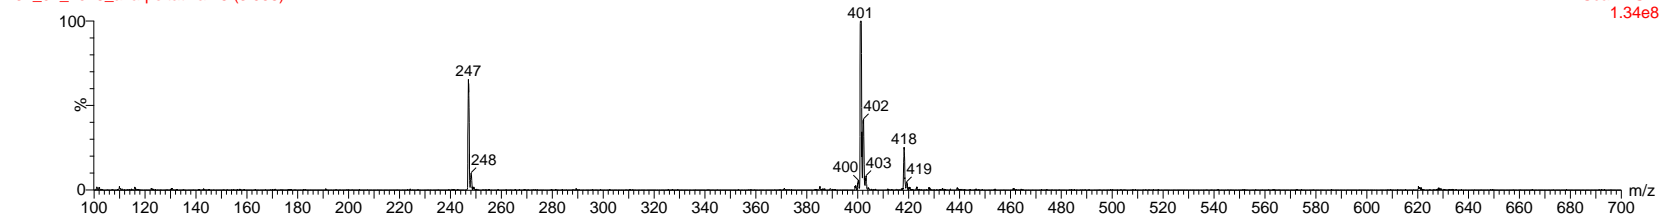

**Figure S12.** DAD, ESI-MS in the negative and positive ionization modes, and ESI-MS/MS spectra obtained online by UPLC-DAD-ESI-MS/MS for alpha-peltatin.

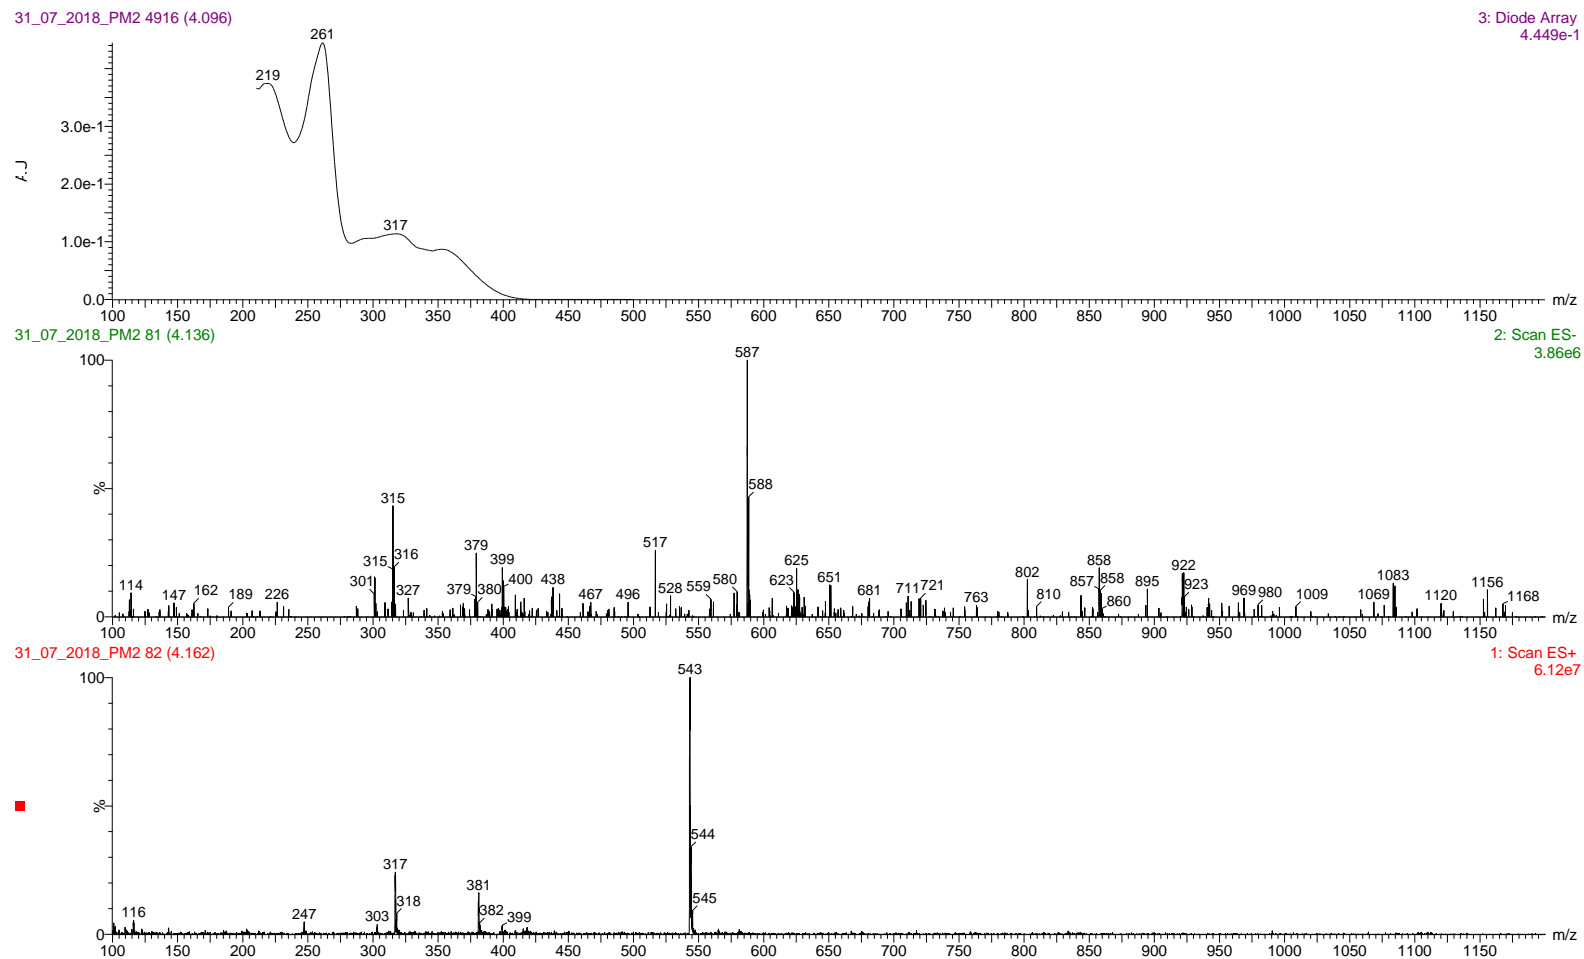

**Figure S13.** DAD, ESI-MS in the negative and positive ionization modes, and ESI-MS/MS spectra obtained online by UPLC-DAD-ESI-MS/MS for chromatographic peak 7.

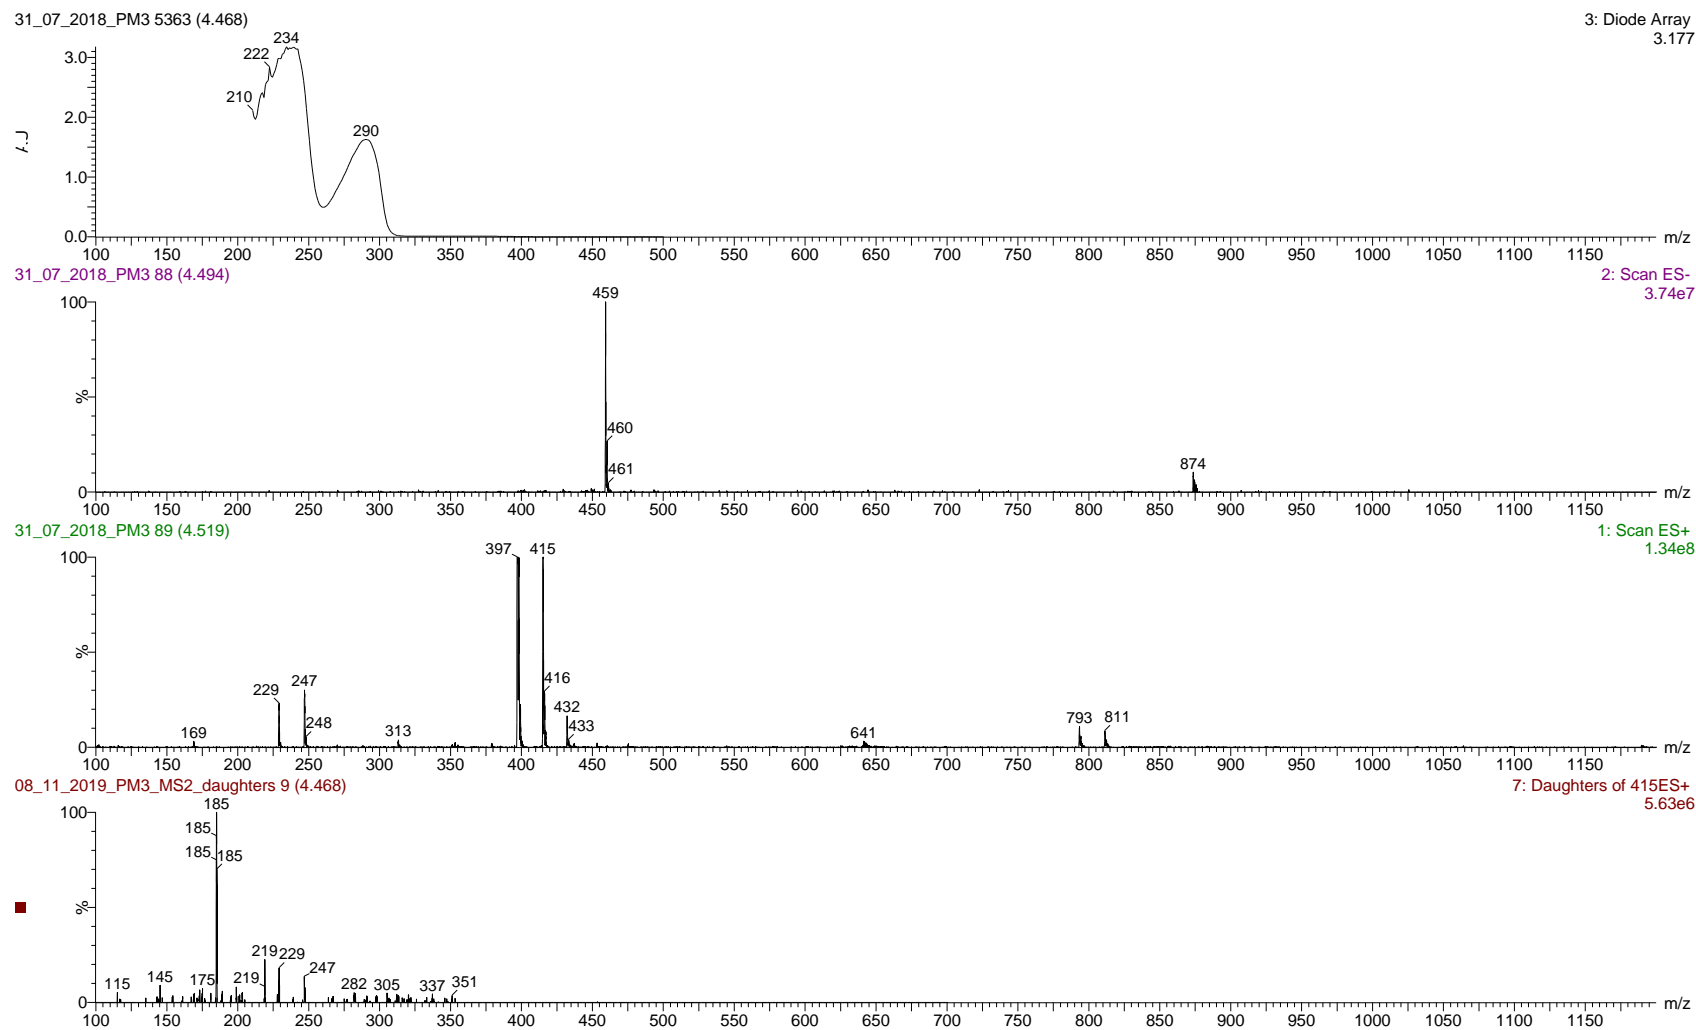

**Figure S14.** DAD, ESI-MS in the negative and positive ionization modes, and ESI-MS/MS spectra obtained online by UPLC-DAD-ESI-MS/MS for chromatographic peak 8.

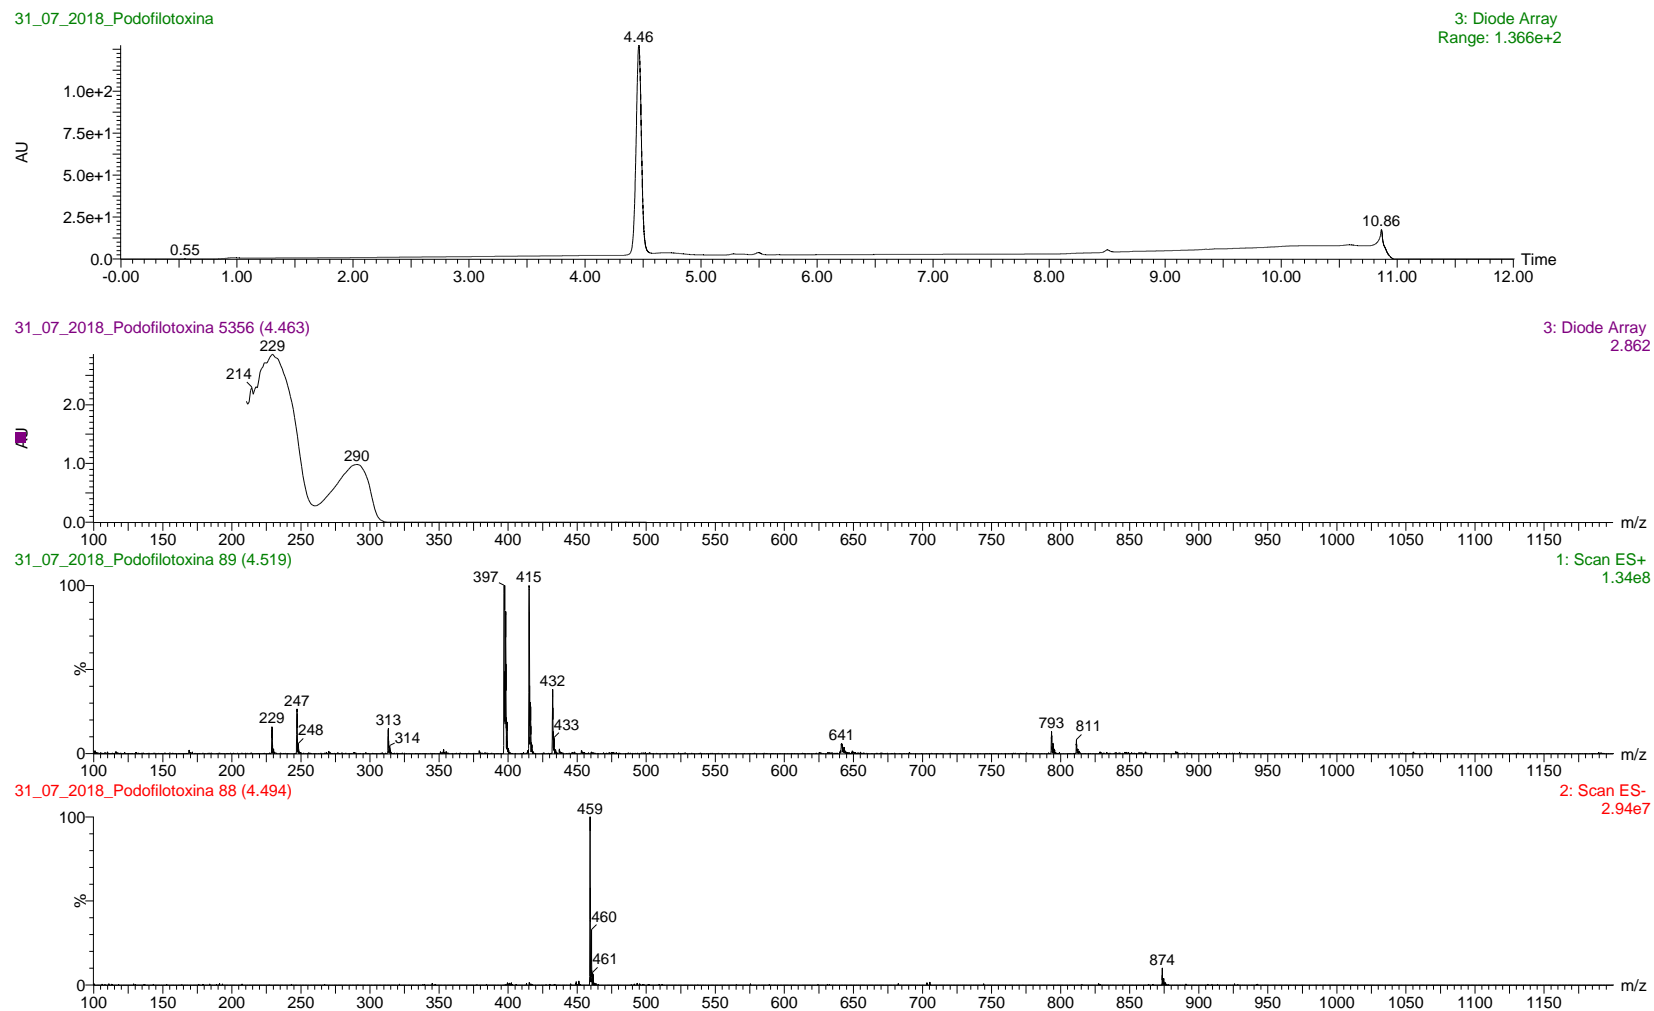

**Figure S15.** DAD, ESI-MS in the negative and positive ionization modes, and ESI-MS/MS spectra obtained online by UPLC-DAD-ESI-MS/MS for podophyllotoxin.

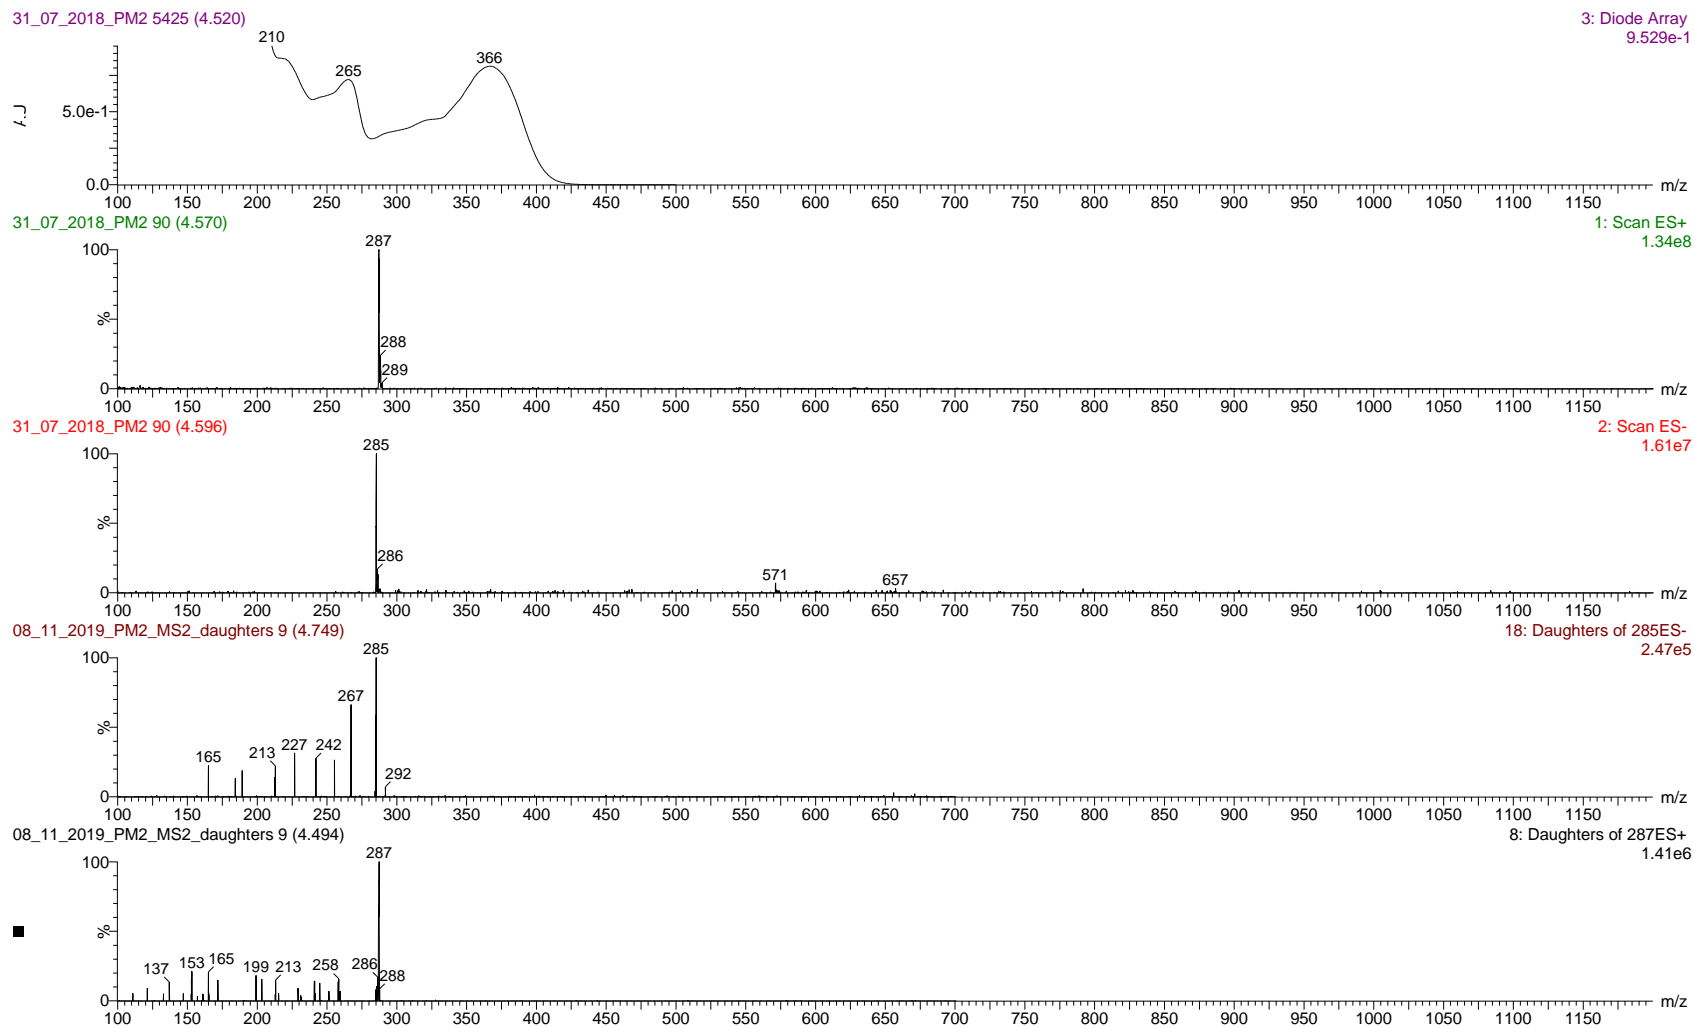

**Figure S16.** DAD, ESI-MS in the negative and positive ionization modes, and ESI-MS/MS spectra obtained online by UPLC-DAD-ESI-MS/MS for chromatographic peak 9.

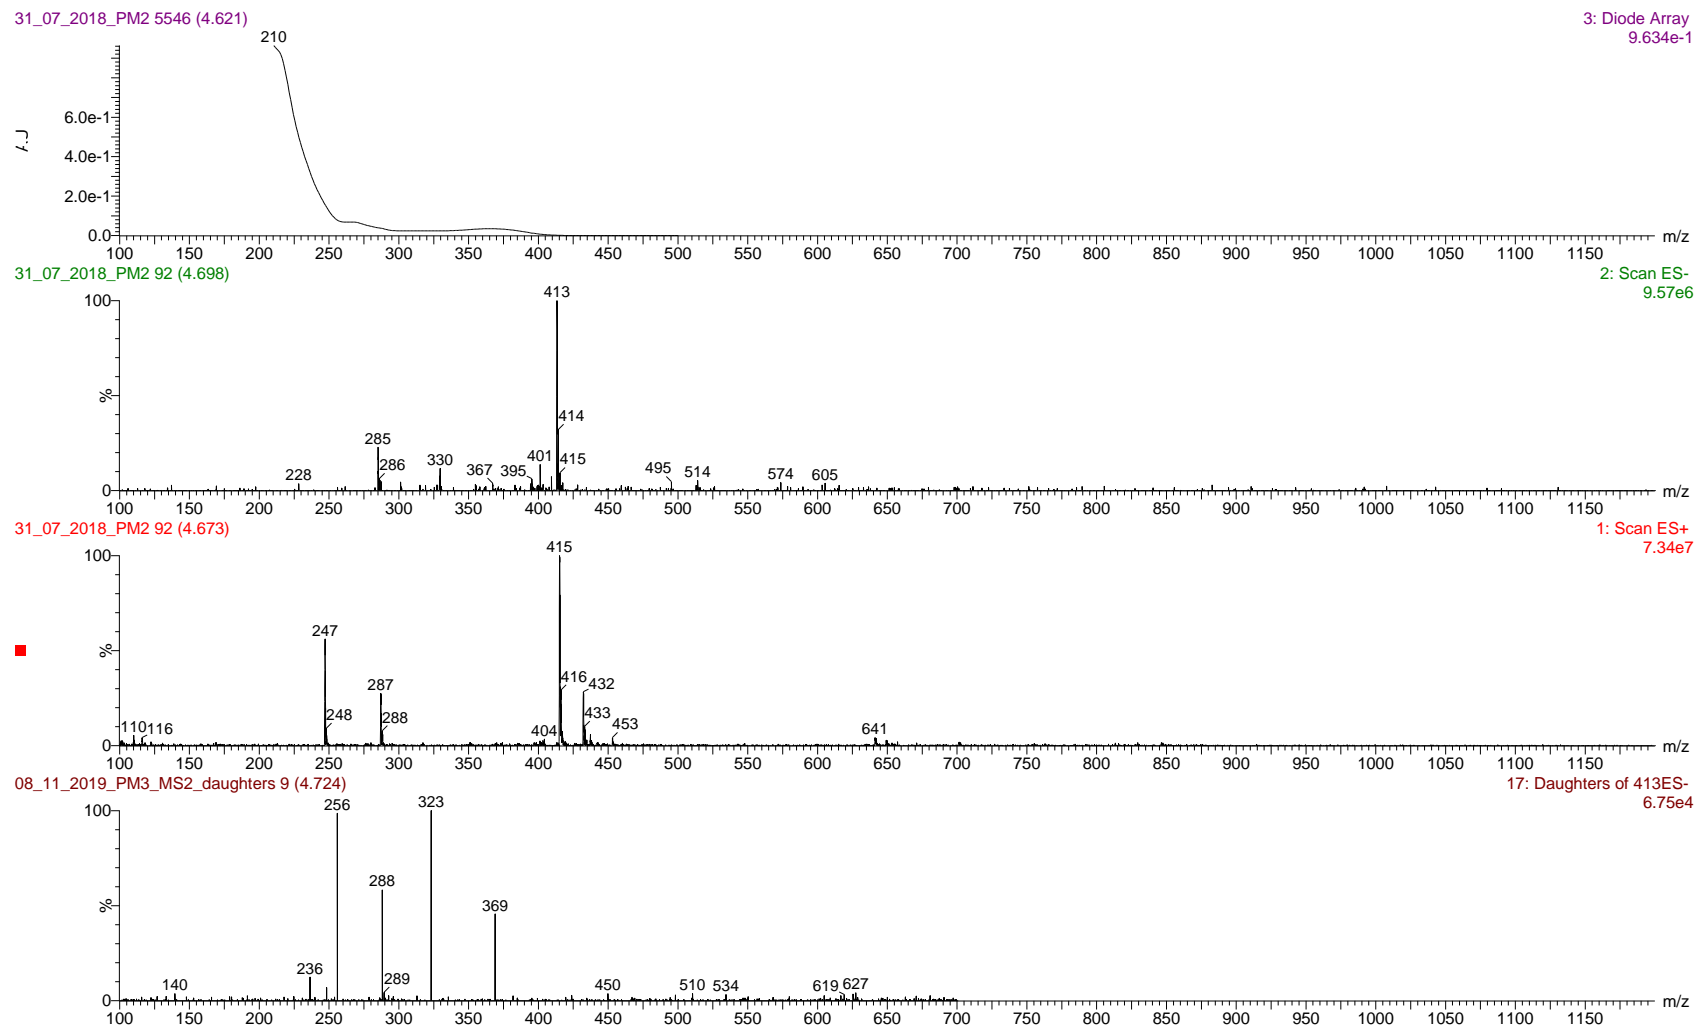

**Figure S17.** DAD, ESI-MS in the negative and positive ionization modes, and ESI-MS/MS spectra obtained online by UPLC-DAD-ESI-MS/MS for chromatographic peak 10.

31\_07\_2018\_beta-peltatina

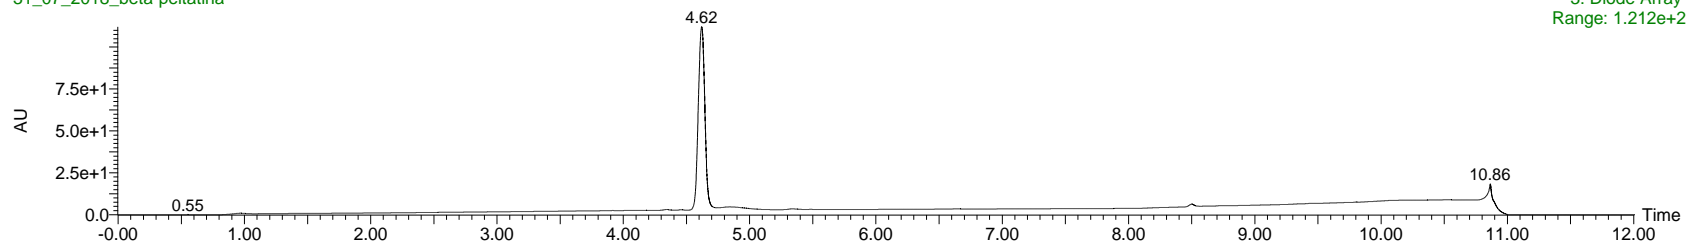

31\_07\_2018\_beta-peltatina 5546 (4.621)

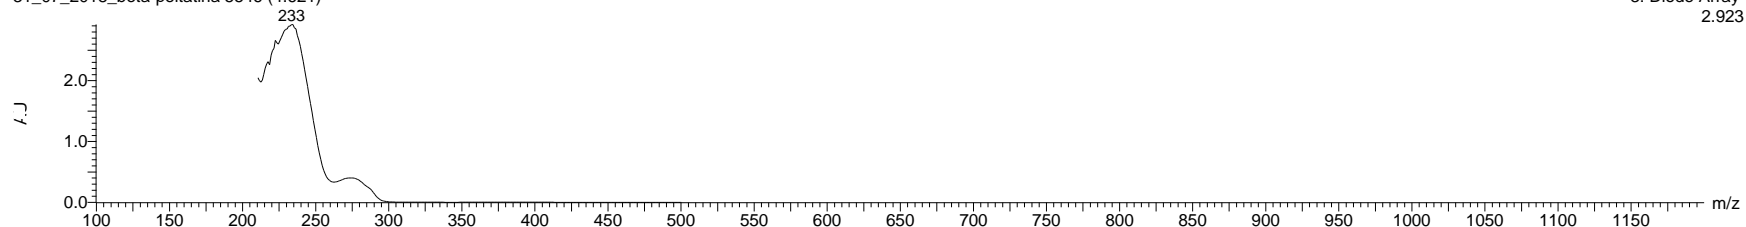

31\_07\_2018\_beta-peltatina 93 (4.724)

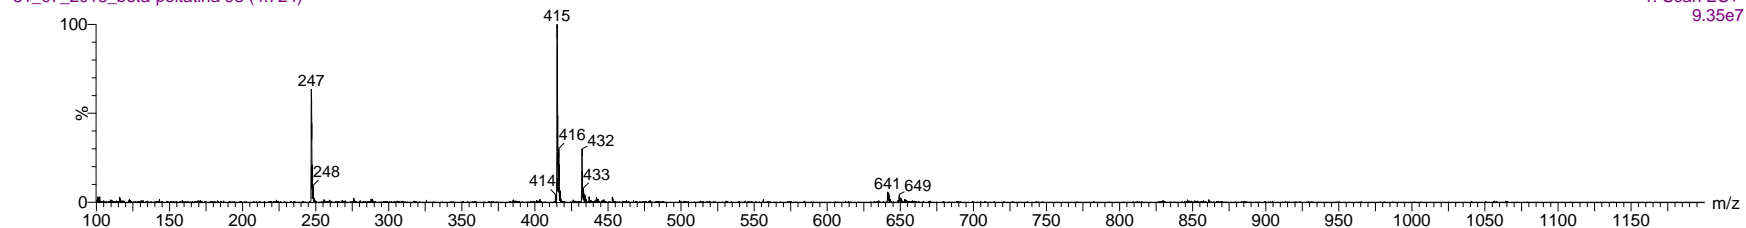

31\_07\_2018\_beta-peltatina 92 (4.698)

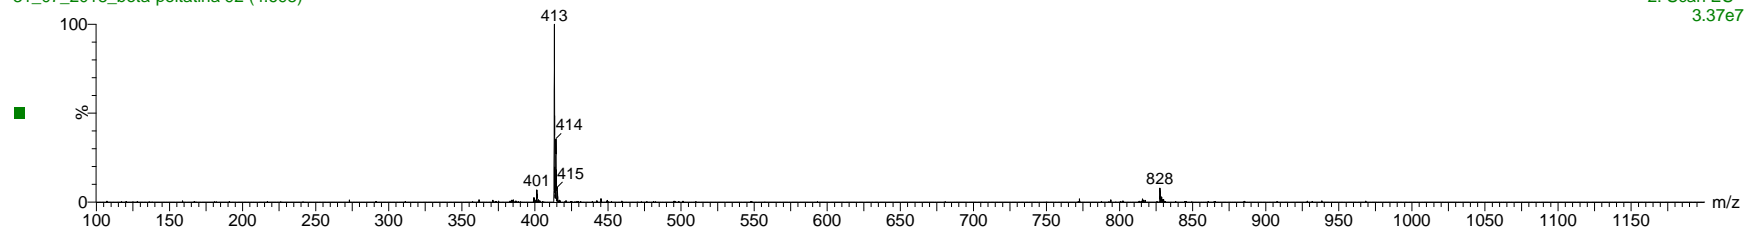

**Figure S18.** DAD, ESI-MS in the negative and positive ionization modes, and ESI-MS/MS spectra obtained online by UPLC-DAD-ESI-MS/MS for beta-peltatine.

31\_07\_2018\_PM3 5841 (4.867)

3: Diode Array  
6.602e-1

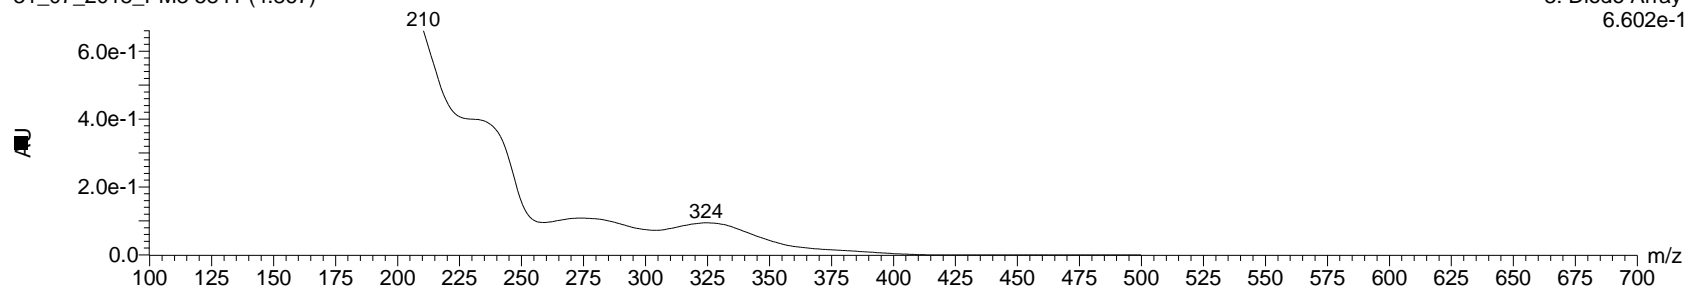

31\_07\_2018\_PM3 97 (4.928)

1: Scan ES+  
5.57e7

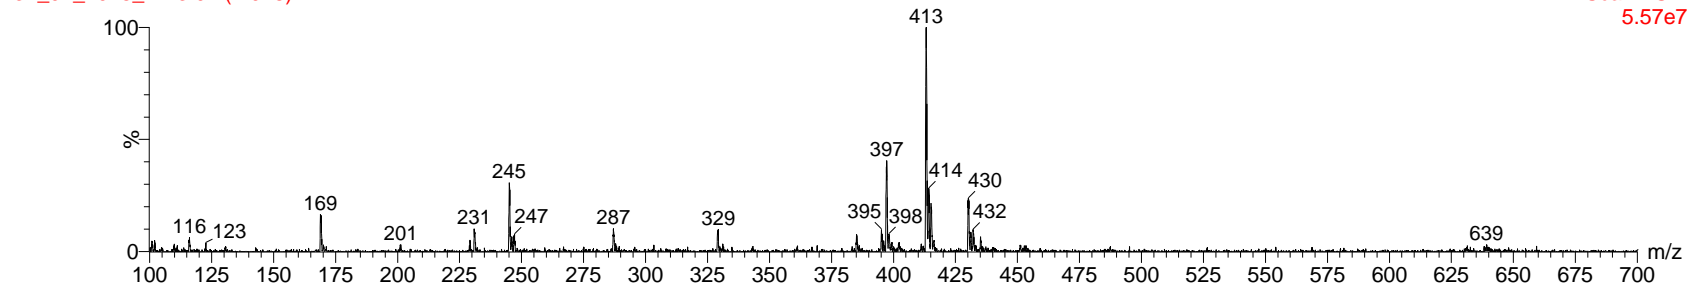

13\_11\_2018\_PM3\_MS2 33 (4.953)

2: Daughters of 413ES+  
2.17e6

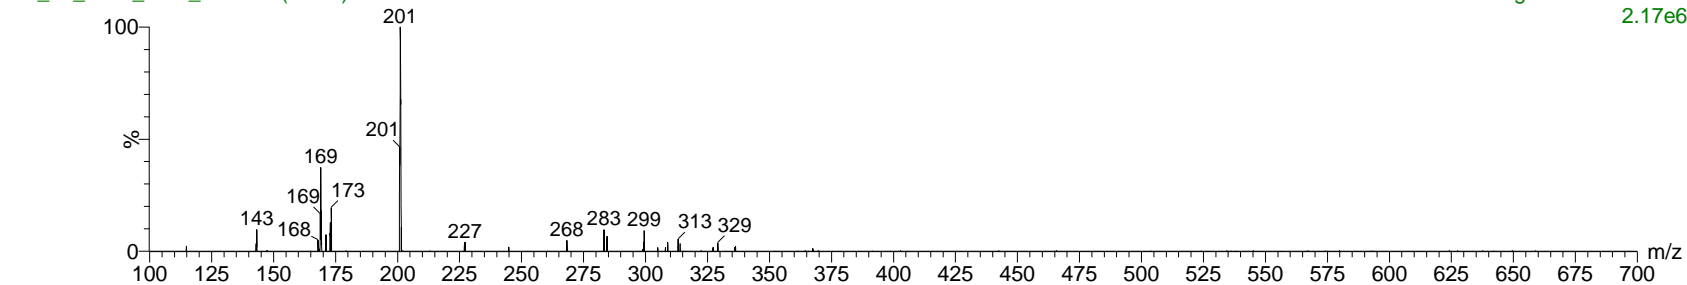

**Figure S19.** DAD, ESI-MS in positive ionization mode, and ESI-MS/MS spectra obtained online by UPLC-DAD-ESI-MS/MS for chromatographic peak 11.

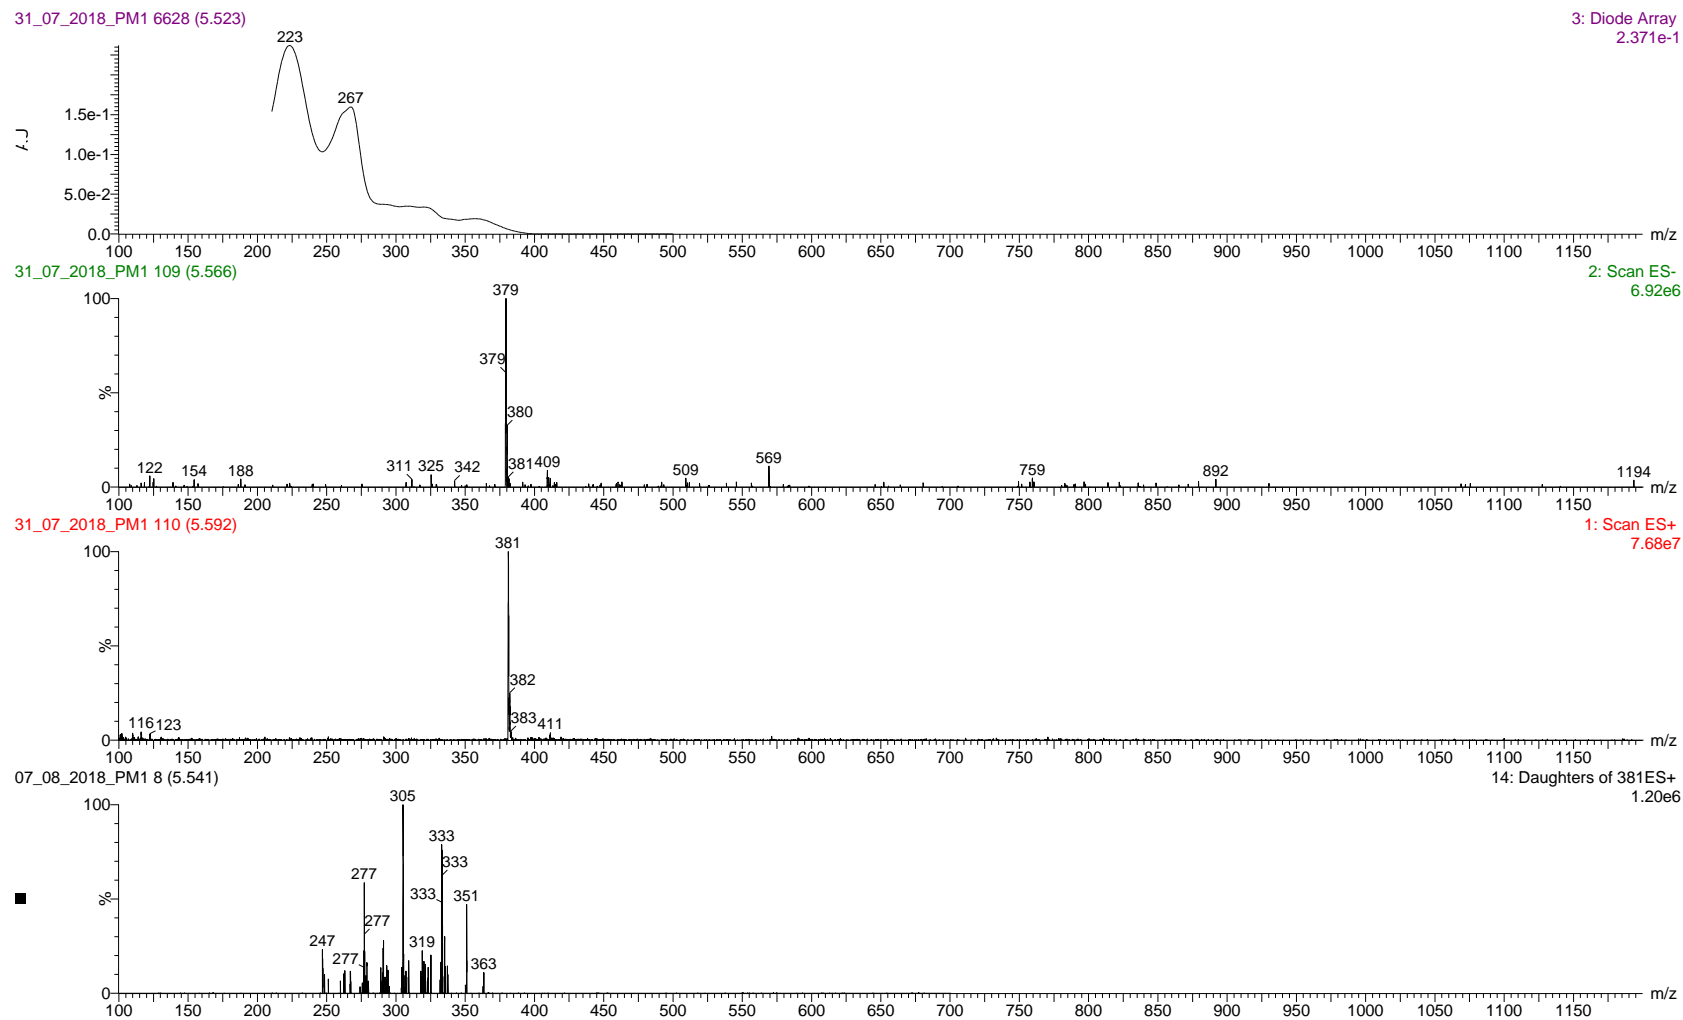

**Figure S20.** DAD, ESI-MS in the negative and positive ionization modes, and ESI-MS/MS spectra obtained online by UPLC-DAD-ESI-MS/MS for chromatographic peak 12.

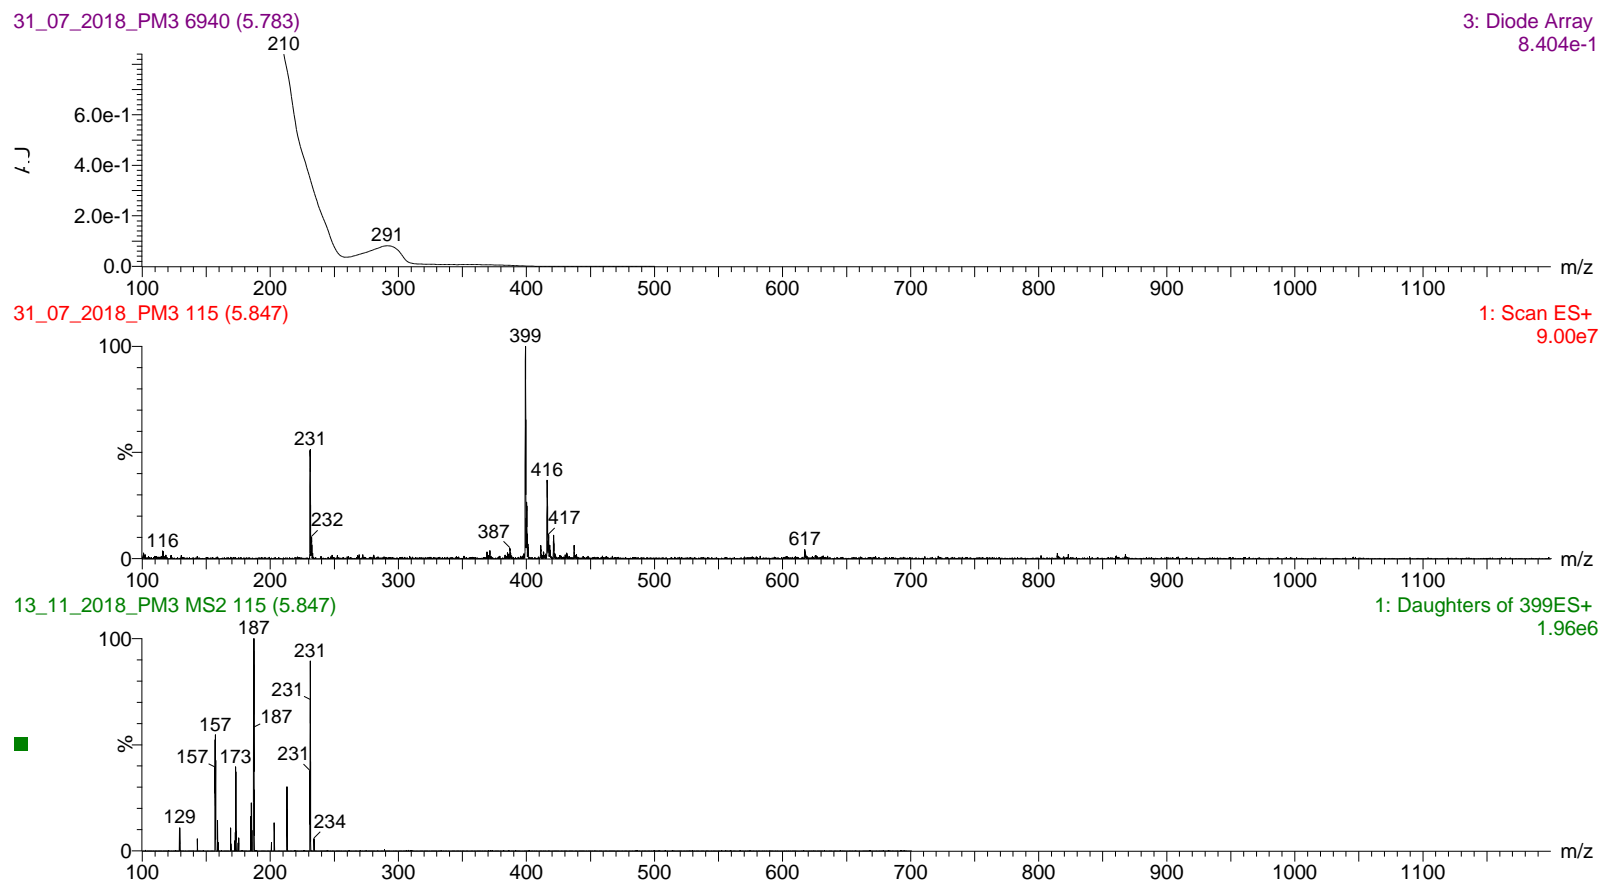

**Figure S21.** DAD, ESI-MS in the positive ionization mode, and ESI-MS/MS spectra obtained online by UPLC-DAD-ESI-MS/MS for chromatographic peak 13.

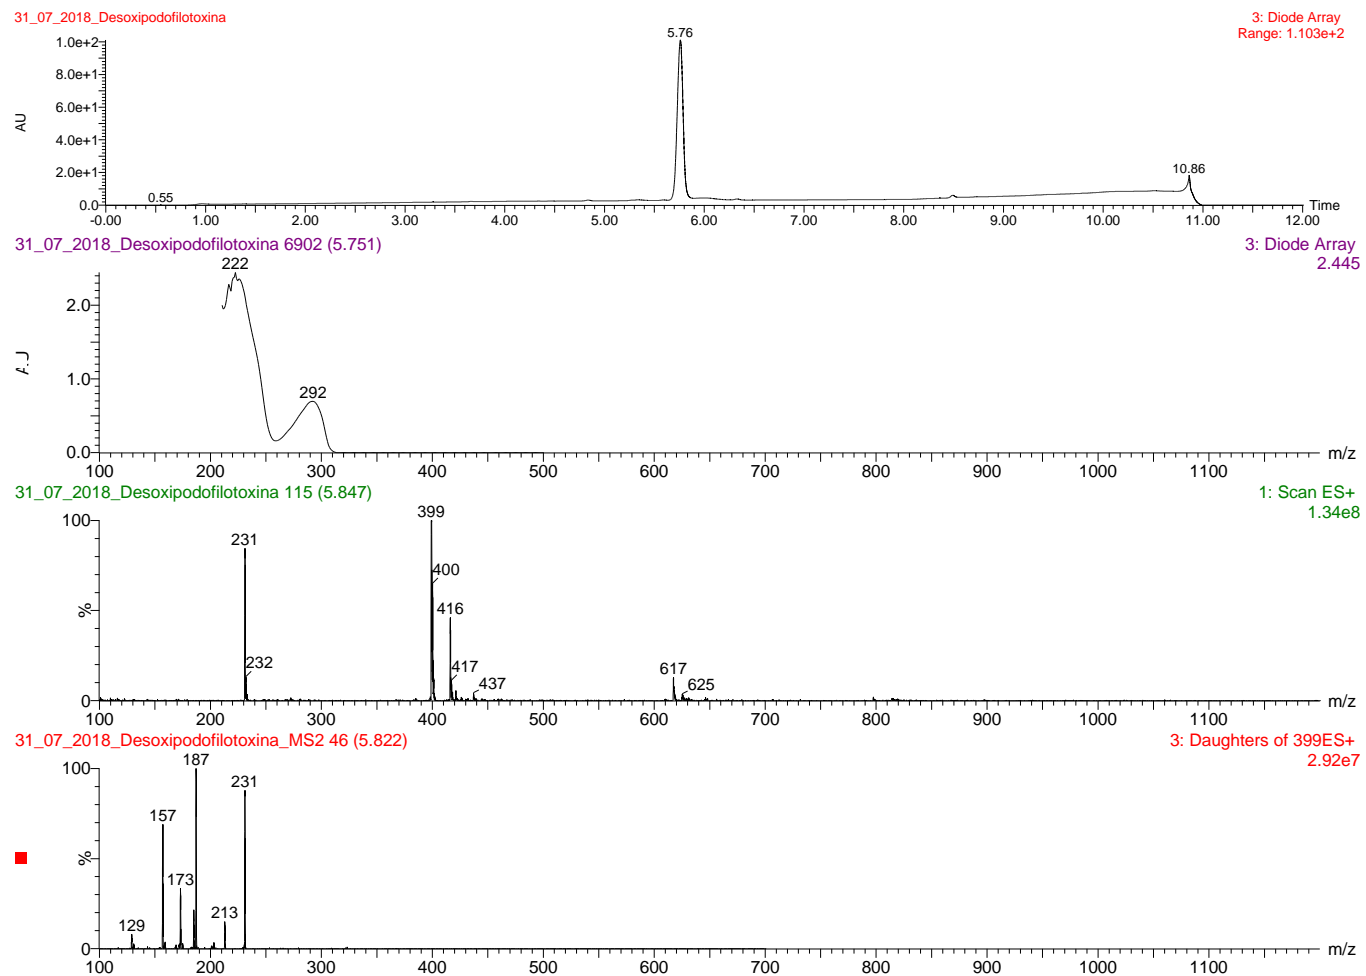

**Figure S22.** DAD, ESI-MS in the positive ionization mode, and ESI-MS/MS spectra obtained online by UPLC-DAD-ESI-MS/MS for deoxypodophyllotoxin.
