# Supplementary material for: Combined In Vitro Studies and in Silico Target Fishing for the Evaluation of the Biological Activities of Diphylleia cymosa and Podophyllum hexandrum
Source: MDPI journal article supplement (doi:10.3390/molecules23123303), 2018-12-13
Supplement: s1 [file s1]

**Table S1:** Biological activities better classified by the SVM method for the group of twenty seven lignans analyzed. The column #Pairs represents the number of occurrences of compounds/models with values of **Pa-Pi greater or equal to 0.25**, with Pa-Pi minimum (pessimistic range) greater than zero. The column #model shows the total number of different models associated with activity class. The score was calculated by dividing the #Pairs by 27, and dividing by the root square of the number of models. The Best Model column shows one of the class models. The Activity column is related to the number of active and inactive compounds found in relation to the number of active and inactive compounds belonging to the same activity class.

| Entry | Activity Class                           | #Pairs | #models | Score | Best model | Activity             | Description                                                                                                                                                                                                                                                                                                                                                                      | Targets                                                             | TTD-Type              | TTD-Disease(2017) |
|-------|------------------------------------------|--------|---------|-------|------------|----------------------|----------------------------------------------------------------------------------------------------------------------------------------------------------------------------------------------------------------------------------------------------------------------------------------------------------------------------------------------------------------------------------|---------------------------------------------------------------------|-----------------------|-------------------|
| 1     | Cytotoxicity, Human Lymphoblastoid Cells | 482    | 37      | 2.93  | 994        |                      | lymphoblastoid cell line                                                                                                                                                                                                                                                                                                                                                         |                                                                     |                       |                   |
| 2     | Anti-Inflammatory model                  | 345    | 33      | 2.22  | 435020     | act=4/5<br>inact=1/5 | NF-kB activation. Many cellular pathways leading to activation of NF-kB-family transcription factors have been identified to be participating in host-defense, immunity, inflammation, and cancer.                                                                                                                                                                               |                                                                     |                       |                   |
| 3     | Bacteria, Salmonella Typhimurium         | 128    | 8       | 1.68  | 2840       |                      |                                                                                                                                                                                                                                                                                                                                                                                  |                                                                     |                       |                   |
| 4     | Ape1 Endonuclease                        | 77     | 3       | 1.65  | 2572       |                      | overexpression of APE1 in many cancers and resistance of these tumor cells to radio- and chemotherapy. Thus, targeting APE1 could improve the efficacy of current treatment paradigms by promoting selective sensitization or protection of diseased and normal cells, respectively.                                                                                             | Chain A, Human Ape1 Endonuclease With Bound Abasic Dna And Mn2+ Ion | Clinical Trial target | Ocular cancer     |
| 5     | Agonista, p53                            | 75     | 3       | 1.6   | 3          | act=2/2<br>inact=1/2 | p53, a tumor suppressor protein, is activated following cellular insult, including DNA damage and other cellular stresses. The activation of p53 regulates cell fate by inducing DNA repair, cell cycle arrest, apoptosis, or cellular senescence. The activation of p53, therefore, is a good indicator of DNA damage and other cellular stresses.                              | Cellular tumor antigen p53                                          |                       |                   |
| 6     | Genotoxicity, ATAD5                      | 104    | 6       | 1.57  | 720516     | act=5/5<br>inact=1/1 | ATPase family AAA domain-containing protein 5. Involved in DNA damage response. Involved in a RAD9A-related damage checkpoint, a pathway that is important in determining whether DNA damage is compatible with cell survival or whether it requires cell elimination by apoptosis. Modulates the RAD9A interaction with BCL2 and thereby induces DNA damages-induced apoptosis. | ATPase family AAA domain-containing protein 5                       |                       |                   |
| 7     | GLI family zinc finger 1                 | 83     | 4       | 1.54  | 651994     |                      | Glioma, B-cell lymphoma, sarcoma. Medulloblastoma, the most common pediatric brain tumor. Hh pathway dysregulation has                                                                                                                                                                                                                                                           | Gli1                                                                | Research target       |                   |

|    |                                                        |     |    |      |         |                      |                                                                                                                                                                                                                                                                                                                                                                                                                                                                                                      |                                                                                |                       |                          |
|----|--------------------------------------------------------|-----|----|------|---------|----------------------|------------------------------------------------------------------------------------------------------------------------------------------------------------------------------------------------------------------------------------------------------------------------------------------------------------------------------------------------------------------------------------------------------------------------------------------------------------------------------------------------------|--------------------------------------------------------------------------------|-----------------------|--------------------------|
|    |                                                        |     |    |      |         |                      | been linked to tumors of the brain, skin, pancreas, breast, ovaries, and blood, and small molecules targeting this pathway are now being pursued as anti-cancer therapies.                                                                                                                                                                                                                                                                                                                           |                                                                                |                       |                          |
| 8  | Plasmodium falciparum                                  | 295 | 54 | 1.49 | 1886    | act=2/4<br>inact=0/3 | Malaria                                                                                                                                                                                                                                                                                                                                                                                                                                                                                              |                                                                                |                       |                          |
| 9  | Anticancer, RecQ-Like Dna Helicase 1 (RECQ1)           | 69  | 3  | 1.48 | 2708    |                      | Human RECQ1 Is a DNA Damage Responsive Protein Required for Genotoxic Stress Resistance and Suppression of Sister Chromatid Exchanges. Developing drugs that interfere with DNA repair, which could sensitize cancer cells to conventional therapy.                                                                                                                                                                                                                                                  | Chain A, Structure Of Human Recq-like Helicase In Complex With A Dna Substrate |                       |                          |
| 10 | Mycobacterium tuberculosis                             | 212 | 29 | 1.46 | 504703  |                      |                                                                                                                                                                                                                                                                                                                                                                                                                                                                                                      |                                                                                |                       |                          |
| 11 | Microphthalmia-associated transcription factor         | 107 | 8  | 1.4  | 493177  |                      | MITF-related melanoma and renal cell carcinoma predisposition syndrome. nervous system disease, eye disease, genetic disorder, skin disease, metabolic disease                                                                                                                                                                                                                                                                                                                                       | Microphthalmia-associated transcription factor                                 |                       |                          |
| 12 | Angiogenesis model                                     | 74  | 4  | 1.37 | 1117340 | act=2/2<br>inact=1/1 | Co-culture of endothelial colony forming cells (ECFC) with adipose-derived stromal cells (ADSC)                                                                                                                                                                                                                                                                                                                                                                                                      |                                                                                |                       |                          |
| 13 | Cytotoxicity, isogenic chicken DT40 cell line          | 64  | 3  | 1.37 | 743012  | act=6/6<br>inact=0/0 | Identification of genotoxic compounds                                                                                                                                                                                                                                                                                                                                                                                                                                                                |                                                                                |                       |                          |
| 14 | Cell Cycle Modulation (counterscreen)                  | 51  | 2  | 1.34 | 1117349 | act=2/2<br>inact=0/0 |                                                                                                                                                                                                                                                                                                                                                                                                                                                                                                      |                                                                                |                       |                          |
| 15 | serine/threonine-protein kinase 33                     | 60  | 3  | 1.28 | 588632  |                      | The serine/threonine kinase 33, STK33, has been identified and shown to be required for the survival and proliferation of mutant KRAS-dependent cells involved in cancer                                                                                                                                                                                                                                                                                                                             | serine/threonine-protein kinase 33 isoform a                                   | Research target       |                          |
| 16 | muscleblind-like protein 1                             | 49  | 2  | 1.28 | 493205  |                      | Dystrophia myotonica 1 (DM1). A muscular disorder characterized by myotonia, muscle wasting in the distal extremities, cataract, hypogonadism, defective endocrine functions, male baldness and cardiac arrhythmias.                                                                                                                                                                                                                                                                                 | muscleblind-like protein 1 isoform a                                           |                       |                          |
| 17 | Herpes simplex virus Virion Protein 16 (counterscreen) | 102 | 9  | 1.26 | 687007  | act=1/1<br>inact=0/4 | Virus, Herpes                                                                                                                                                                                                                                                                                                                                                                                                                                                                                        | transactivating tegument protein VP16                                          |                       |                          |
| 18 | ADMET, Cytochrome P450 3A4                             | 68  | 4  | 1.26 | 625251  | act=1/1<br>inact=0/1 | Cytochromes P450 are a group of heme-thiolate monooxygenases. In liver microsomes, this enzyme is involved in an NADPH-dependent electron transport pathway. It performs a variety of oxidation reactions (e.g. caffeine 8-oxidation, omeprazole sulfoxidation, midazolam 1'-hydroxylation and midazolam 4-hydroxylation) of structurally unrelated compounds, including steroids, fatty acids, and xenobiotics. Acts as a 1,8-cineole 2- exo-monooxygenase. The enzyme also hydroxylates etoposide. | Cytochrome P450 3A4                                                            | Clinical Trial target | Anxiety disorder; Cancer |

|    |                                              |     |    |      |         |                      |                                                                                                                                                                                                                                                                                                                                                                                                                                                                                                                                                                |                                 |                   |                                                                                                                                                                                                                                                                                                                                                                                                                                                                                                                                                                                  |
|----|----------------------------------------------|-----|----|------|---------|----------------------|----------------------------------------------------------------------------------------------------------------------------------------------------------------------------------------------------------------------------------------------------------------------------------------------------------------------------------------------------------------------------------------------------------------------------------------------------------------------------------------------------------------------------------------------------------------|---------------------------------|-------------------|----------------------------------------------------------------------------------------------------------------------------------------------------------------------------------------------------------------------------------------------------------------------------------------------------------------------------------------------------------------------------------------------------------------------------------------------------------------------------------------------------------------------------------------------------------------------------------|
| 19 | Osteoporosis model                           | 59  | 3  | 1.26 | 1117326 | act=3/3<br>inact=0/0 | Wnt potentiation module is to identify agents that may serve as novel medications for bone development and, specifically, osteoporosis                                                                                                                                                                                                                                                                                                                                                                                                                         |                                 |                   |                                                                                                                                                                                                                                                                                                                                                                                                                                                                                                                                                                                  |
| 20 | regulator of G-protein signaling 8           | 48  | 2  | 1.26 | 1869    |                      | Since GPCRs control numerous physiologic processes in diverse tissues, including brain, heart, liver, and lung, modulation of the RGS/G protein interaction has become an attractive target for drug discovery.                                                                                                                                                                                                                                                                                                                                                | RGS8 protein                    |                   |                                                                                                                                                                                                                                                                                                                                                                                                                                                                                                                                                                                  |
| 21 | Virus, HIV-1                                 | 150 | 20 | 1.24 | 652241  |                      |                                                                                                                                                                                                                                                                                                                                                                                                                                                                                                                                                                | Vif                             |                   |                                                                                                                                                                                                                                                                                                                                                                                                                                                                                                                                                                                  |
| 22 | Agonista, estrogen receptor alpha (ER-alpha) | 67  | 4  | 1.24 | 743077  |                      | Estrogen receptor alpha. Estrogen insensitivity syndrome is a very rare condition characterized by a defective ER $\alpha$ that is insensitive to estrogens. The clinical presentation of a female was observed to include absence of breast development and other female secondary sexual characteristics at puberty, hypoplastic uterus, primary amenorrhea, enlarged multicystic ovaries and associated lower abdominal pain, mild hyperandrogenism (manifested as cystic acne), and delayed bone maturation as well as an increased rate of bone turnover. | estrogen nuclear receptor alpha | Successful target | Acne vulgaris; Adrenocortical carcinoma; Advanced prostate cancer; Arthralgia; Atrophic vaginitis; Atrophy; Autoimmune diabetes; Brain cancer; Breast cancer; Prostate cancer; Female infertility; Cancer; Carcinoma; Contraception; Dysmenorrhea; Dyspareunia; Estrogen deficiency; Eye disorders; Female hypogonadism; Female infertility; Female infertility due to anovulation; Female sexual dysfunction; Gonorrheal vaginitis; Hormone deficiency; Hormone replacement therapy; Hyperlipidaemia; Hypogonadism; Infertility; Irregularities; Leukemia; Menopausal disorder; |

|    |                                                 |    |   |      |        |                      |                                                                                                                                                                                                                                                                                                                                                                                                                                                                                                                                                                |                                 |                   |                                                                                                                                                                                                                                                                                                                                                                                                                                                          |
|----|-------------------------------------------------|----|---|------|--------|----------------------|----------------------------------------------------------------------------------------------------------------------------------------------------------------------------------------------------------------------------------------------------------------------------------------------------------------------------------------------------------------------------------------------------------------------------------------------------------------------------------------------------------------------------------------------------------------|---------------------------------|-------------------|----------------------------------------------------------------------------------------------------------------------------------------------------------------------------------------------------------------------------------------------------------------------------------------------------------------------------------------------------------------------------------------------------------------------------------------------------------|
|    |                                                 |    |   |      |        |                      |                                                                                                                                                                                                                                                                                                                                                                                                                                                                                                                                                                |                                 |                   | Postmenopausal disorder;<br>Menopause symptoms;<br>Hormone refractory prostate cancer;<br>Menorrhagia;<br>Multiple sclerosis;<br>Neurological disease; Oral contraceptives;<br>Osteopetrosis;<br>Osteoporosis; Pain;<br>Post-menopausal vaginal atrophy;<br>Trematode infection; Vagina disease                                                                                                                                                          |
| 23 | peripheral myelin protein 22                    | 47 | 2 | 1.23 | 624044 | act=2/2<br>inact=0/0 | Destabilization of myelin and neuropathic disorders, such as Charcot-Marie-Tooth type 1A (CMT1A), Dejerine-Sottas disease, and Hereditary Neuropathy with Liability to Pressure Palsy (HNPP)                                                                                                                                                                                                                                                                                                                                                                   | peripheral myelin protein 22    |                   |                                                                                                                                                                                                                                                                                                                                                                                                                                                          |
| 24 | Antagonista, estrogen receptor alpha (ER-alpha) | 82 | 7 | 1.15 | 743091 | act=2/2<br>inact=0/6 | Estrogen receptor alpha. Estrogen insensitivity syndrome is a very rare condition characterized by a defective ER $\alpha$ that is insensitive to estrogens. The clinical presentation of a female was observed to include absence of breast development and other female secondary sexual characteristics at puberty, hypoplastic uterus, primary amenorrhea, enlarged multicystic ovaries and associated lower abdominal pain, mild hyperandrogenism (manifested as cystic acne), and delayed bone maturation as well as an increased rate of bone turnover. | estrogen nuclear receptor alpha | Successful target | Acne vulgaris;<br>Adrenocortical carcinoma;<br>Advanced prostate cancer; Arthralgia;<br>Atrophic vaginitis;<br>Atrophy;<br>Autoimmune diabetes; Brain cancer; Breast cancer; Prostate cancer; Female infertility; Cancer; Carcinoma;<br>Contraception;<br>Dysmenorrhea;<br>Dyspareunia;<br>Estrogen deficiency;<br>Eye disorders;<br>Female hypogonadism;<br>Female infertility;<br>Female infertility due to anovulation;<br>Female sexual dysfunction; |

|    |                                                                  |     |    |      |        |                        |                                                                       |                                                                                                            |  |                                                                                                                                                                                                                                                                                                                                                                                                                                        |
|----|------------------------------------------------------------------|-----|----|------|--------|------------------------|-----------------------------------------------------------------------|------------------------------------------------------------------------------------------------------------|--|----------------------------------------------------------------------------------------------------------------------------------------------------------------------------------------------------------------------------------------------------------------------------------------------------------------------------------------------------------------------------------------------------------------------------------------|
|    |                                                                  |     |    |      |        |                        |                                                                       |                                                                                                            |  | Gonorrheal vaginitis; Hormone deficiency; Hormone replacement therapy; Hyperlipidaemia; Hypogonadism; Infertility; Irregularities; Leukemia; Menopausal disorder; Postmenopausal disorder; Menopause symptoms; Hormone refractory prostate cancer; Menorrhagia; Multiple sclerosis; Neurological disease; Oral contraceptives; Osteopetrosis; Osteoporosis; Pain; Post-menopausal vaginal atrophy; Trematode infection; Vagina disease |
| 25 | 1-acylglycerol-3-phosphate O-acyltransferase ABHD5               | 61  | 4  | 1.13 | 651677 |                        | lipid disorders such as obesity, diabetes, and cardiovascular disease | 1-acylglycerol-3-phosphate O-acyltransferase ABHD5; perilipin-5                                            |  |                                                                                                                                                                                                                                                                                                                                                                                                                                        |
| 26 | ADP Fluorescence Polarization Displacement Assay (counterscreen) | 43  | 2  | 1.13 | 2712   |                        | 0                                                                     |                                                                                                            |  |                                                                                                                                                                                                                                                                                                                                                                                                                                        |
| 27 | Giardia lamblia                                                  | 72  | 6  | 1.09 | 2787   |                        |                                                                       | Chain A, Structure Of Giardia Fructose-1,6-biphosphate Aldolase In Complex With Phospho-glycolohydroxamate |  |                                                                                                                                                                                                                                                                                                                                                                                                                                        |
| 28 | Anticancer, Leukemia                                             | 109 | 14 | 1.08 | 328    | act=11/11<br>inact=0/5 | 0                                                                     |                                                                                                            |  |                                                                                                                                                                                                                                                                                                                                                                                                                                        |

|    |                                                            |    |    |      |        |                      |                                                                                                                                                                                                                                                                                                                                                                                                                                                                                                                                                                                                                                                         |            |                   |                                                                                                                                                                                                                                                                                                                                                                                                                                                                                                                                                                                                                                        |
|----|------------------------------------------------------------|----|----|------|--------|----------------------|---------------------------------------------------------------------------------------------------------------------------------------------------------------------------------------------------------------------------------------------------------------------------------------------------------------------------------------------------------------------------------------------------------------------------------------------------------------------------------------------------------------------------------------------------------------------------------------------------------------------------------------------------------|------------|-------------------|----------------------------------------------------------------------------------------------------------------------------------------------------------------------------------------------------------------------------------------------------------------------------------------------------------------------------------------------------------------------------------------------------------------------------------------------------------------------------------------------------------------------------------------------------------------------------------------------------------------------------------------|
| 29 | TOR pathway GFP-fusion proteins [Saccharomyces cerevisiae] | 97 | 11 | 1.08 | 488808 |                      | TORC1 is a central hub of a signaling network that couples cues from hormones and growth factors (in mammalian cells), energy and stresses, and the abundance of nutrients, to cell growth and proliferation. Very recent work has elucidated many details of the signaling events upstream of TORC1 as well as downstream targets of TORC1. Importantly, in this context, most negative regulators of mammalian TORC1 (mTORC1) have been previously identified as tumor suppressor gene products, while many positive regulators of mTORC1 have been identified as proto-oncoproteins and/or are found at elevated levels in tumor-derived cell lines. | RPL19A     |                   |                                                                                                                                                                                                                                                                                                                                                                                                                                                                                                                                                                                                                                        |
| 30 | Antagonista, androgen receptor (AR)                        | 77 | 7  | 1.08 | 743035 | act=4/4<br>inact=0/4 | Androgen receptor. The normal development and maintenance of the prostate is dependent on androgen acting through the androgen receptor (AR). AR remains important in the development and progression of prostate cancer. AR ligands are widely used in a variety of clinical applications (i.e., agonists are employed for hypogonadism, while antagonists are used for prostate cancer therapy).                                                                                                                                                                                                                                                      | AR protein | Successful target | Acne vulgaris;<br>Atherosclerosis;<br>Advanced prostate cancer;<br>Alcoholic hepatitis;<br>Alopecia;<br>Bladder cancer;<br>Cachexia;<br>Cancer;<br>Cardiovascular disorder;<br>Castration-resistant prostate cancer;<br>Contraception;<br>Cystic fibrosis;<br>Dermatological disease;<br>Dysmenorrhea;<br>Endocrine disease;<br>Female androgenresponsive recurrent mammary cancer;<br>Heart failure;<br>Hormone deficiency;<br>Hormone refractory prostate cancer;<br>Hypogonadism;<br>Male hormonal deficiencies;<br>Male hypogonadism;<br>Breast cancer;<br>Metastatic castration-resistant prostate cancer;<br>Metastatic prostate |

|    |                                                                 |    |   |      |         |                      |                                                                                                                                                                                                                                                                                                                                                                                                                                                                                                                                                       |                                      |  |                                                                                                                                                   |
|----|-----------------------------------------------------------------|----|---|------|---------|----------------------|-------------------------------------------------------------------------------------------------------------------------------------------------------------------------------------------------------------------------------------------------------------------------------------------------------------------------------------------------------------------------------------------------------------------------------------------------------------------------------------------------------------------------------------------------------|--------------------------------------|--|---------------------------------------------------------------------------------------------------------------------------------------------------|
|    |                                                                 |    |   |      |         |                      |                                                                                                                                                                                                                                                                                                                                                                                                                                                                                                                                                       |                                      |  | cancer; Muscle atrophy; Osteoporosis; Osteoporosis in post-menopausal women; Pain; Prostate cancer; Prostate hyperplasia; Testosterone deficiency |
| 31 | dual specificity protein kinase CLK4                            | 50 | 3 | 1.07 | 1795    |                      |                                                                                                                                                                                                                                                                                                                                                                                                                                                                                                                                                       | dual specificity protein kinase CLK4 |  |                                                                                                                                                   |
| 32 | Cytotoxicity, Jurkat                                            | 63 | 5 | 1.04 | 364     | act=1/1<br>inact=0/1 | Organism: Homo sapiens / Tissue: peripheral blood / Cell Type: T Cell/ T Lymphocyte / Disease: acute T cell leukemia. immortalized line of human T lymphocyte cells that are used to study acute T cell leukemia, T cell signaling, and the expression of various chemokine receptors susceptible to viral entry, particularly HIV. Jurkat cells are useful in science because of their ability to produce interleukin 2. Their primary use, however, is to determine the mechanism of differential susceptibility of cancers to drugs and radiation. |                                      |  |                                                                                                                                                   |
| 33 | regulator of G-protein signaling 7                              | 39 | 2 | 1.02 | 1871    |                      | Since GPCRs control numerous physiologic processes in diverse tissues, including brain, heart, liver, and lung, modulation of the RGS/G protein interaction has become an attractive target for drug discovery.                                                                                                                                                                                                                                                                                                                                       | RGS7, partial                        |  |                                                                                                                                                   |
| 34 | Cytotoxicity, L929                                              | 39 | 2 | 1.02 | 463117  |                      | Organism: Mus musculus, mouse / Tissue: subcutaneous connective tissue; areolar and adipose /                                                                                                                                                                                                                                                                                                                                                                                                                                                         |                                      |  |                                                                                                                                                   |
| 35 | Anticancer, Mixed Lineage Leukemia                              | 39 | 2 | 1.02 | 624162  |                      | The MLL (Mixed Lineage Leukemia) gene is involved in chromosomal translocation that results in either acute lymphoid leukemia (ALL) or acute myeloid leukemia (AML). Chromosomal translocation of MLL gene is responsible for the fusion of N-terminal MLL to more than 60 different partner genes in frame. We have miniaturized and optimized an in-vitro assay to screen for inhibitors of the MLL-CXXC domain and HOX-A DNA interaction, which could have utility in MLL fusion leukemias.                                                        |                                      |  |                                                                                                                                                   |
| 36 | Antagonista, retinoid-related orphan receptor gamma (ROR-gamma) | 39 | 2 | 1.02 | 1159523 | act=2/2<br>inact=0/0 | RAR-related orphan receptor gamma (ROR $\gamma$ ). The ROR $\gamma$ protein is a DNA-binding transcription factor and is a member of the NR1                                                                                                                                                                                                                                                                                                                                                                                                          | RAR-related orphan receptor gamma    |  |                                                                                                                                                   |

|    |                                                                        |    |   |   |        |                      |                                                                                                                                                                                                                                                                                                                                                                                                                                                                                                                                                                                                                                                                                                                                                                                                                                                                                                                                                                                                                                          |                                         |                   |                                                                                                                              |
|----|------------------------------------------------------------------------|----|---|---|--------|----------------------|------------------------------------------------------------------------------------------------------------------------------------------------------------------------------------------------------------------------------------------------------------------------------------------------------------------------------------------------------------------------------------------------------------------------------------------------------------------------------------------------------------------------------------------------------------------------------------------------------------------------------------------------------------------------------------------------------------------------------------------------------------------------------------------------------------------------------------------------------------------------------------------------------------------------------------------------------------------------------------------------------------------------------------------|-----------------------------------------|-------------------|------------------------------------------------------------------------------------------------------------------------------|
|    |                                                                        |    |   |   |        |                      | subfamily of nuclear receptors. The ROR $\gamma$ isoform appears to be involved in the regulation of circadian rhythms. Also, since the levels of ROR $\gamma$ are rhythmic in some tissues (liver, kidney), it has been proposed to impose a circadian pattern of expression on a number of clock-controlled genes, for example the cell cycle regulator p21. ROR $\gamma$ t is the most studied of the two isoforms. Its best understood functionality is in the immune system. The transcription factor is essential for lymphoid organogenesis, in particular lymph nodes and Peyer's patches, but not the spleen. ROR $\gamma$ t also plays an important regulatory role in thymopoiesis, by reducing apoptosis of thymocytes and promoting thymocyte differentiation into pro-inflammatory T helper 17 (Th17) cells. It also plays a role in inhibiting apoptosis of undifferentiated T cells and promoting their differentiation into Th17 cells, possibly by down regulating the expression of Fas ligand and IL2, respectively. |                                         |                   |                                                                                                                              |
| 37 | Antagonista, thyroid receptor (TR)                                     | 38 | 2 | 1 | 743067 | act=3/3<br>inact=0/0 | Among the most important functions of thyroid hormone receptors are regulation of metabolism and heart rate. In addition, they play critical roles in the development of organisms. Certain mutations in the thyroid hormone receptor are associated with thyroid hormone resistance.                                                                                                                                                                                                                                                                                                                                                                                                                                                                                                                                                                                                                                                                                                                                                    | thyroid hormone receptor beta isoform 2 | Successful target | High cholesterol levels in blood; Hyperlipidaemia; Hyperthyroidism; Hypothyroidism; Lipid metabolism disorder; Wound healing |
| 38 | yeast SKN7-mediated toxicity (counterscreen)                           | 27 | 1 | 1 | 624258 |                      | counterscreen , the aim is to eliminate compounds with non-specific effects on yeast growth                                                                                                                                                                                                                                                                                                                                                                                                                                                                                                                                                                                                                                                                                                                                                                                                                                                                                                                                              | Skn7p                                   |                   |                                                                                                                              |
| 39 | Steroidogenic acute regulatory protein (StAR) promoter (counterscreen) | 27 | 1 | 1 | 651611 | act=1/1<br>inact=0/0 | Interference with HTS                                                                                                                                                                                                                                                                                                                                                                                                                                                                                                                                                                                                                                                                                                                                                                                                                                                                                                                                                                                                                    |                                         |                   |                                                                                                                              |
| 40 | regulator of G-protein signaling 19                                    | 27 | 1 | 1 | 1884   |                      | Regulates G protein-coupled receptor signaling cascades. Inhibits signal transduction by increasing the GTPase activity of G protein alpha subunits, thereby driving them into their inactive GDP-bound form (PMID:11602604, PMID:18434541). Plays an important role in the phototransduction cascade by regulating the lifetime and effective concentration of activated transducin alpha. May regulate extra and intracellular mitogenic signals.                                                                                                                                                                                                                                                                                                                                                                                                                                                                                                                                                                                      | regulator of G-protein signaling 19     |                   |                                                                                                                              |
| 41 | regulator of G-protein signaling 16                                    | 27 | 1 | 1 | 1888   |                      | Regulates G protein-coupled receptor signaling cascades. Inhibits signal transduction by                                                                                                                                                                                                                                                                                                                                                                                                                                                                                                                                                                                                                                                                                                                                                                                                                                                                                                                                                 | regulator of G-protein signaling 16     | Research target   |                                                                                                                              |

|    |                                 |    |   |   |        |                                                                                                                                                                                                                                                                                                                                                                                                                                                                                                                                                                                       |                                   |                 |  |
|----|---------------------------------|----|---|---|--------|---------------------------------------------------------------------------------------------------------------------------------------------------------------------------------------------------------------------------------------------------------------------------------------------------------------------------------------------------------------------------------------------------------------------------------------------------------------------------------------------------------------------------------------------------------------------------------------|-----------------------------------|-----------------|--|
|    |                                 |    |   |   |        | increasing the GTPase activity of G protein alpha subunits, thereby driving them into their inactive GDP-bound form. Plays an important role in the phototransduction cascade by regulating the lifetime and effective concentration of activated transducin alpha. May regulate extra and intracellular mitogenic signals.                                                                                                                                                                                                                                                           |                                   |                 |  |
| 42 | RanGTP-Importin-beta complex    | 27 | 1 | 1 | 2823   | Ran has been implicated in the regulation of several mitotic events, including spindle assembly, kinetochore assembly, and nuclear envelope assembly. The small molecule inhibitors/probes identified in the screen would be extremely useful for elucidating the mitotic roles of Ran and disrupting the Ran pathway at particular stages in mitosis. This will allow us to assess the importance of this pathway throughout the course of cell division. In addition, the small molecule inhibitors/probes have potential therapeutic value for human disease, such as cancer drug. |                                   |                 |  |
| 43 | Prepl protein                   | 27 | 1 | 1 | 624481 | Hypotonia-cystinuria syndrome (HCS) and 2p21 deletion syndrome are debilitating and poorly understood diseases, both involving deletion of the gene encoding prolyl oligopeptidase-like enzyme (PREPL), a member of the prolyl oligopeptidase (POP) family of serine peptidases.                                                                                                                                                                                                                                                                                                      | Prepl protein                     |                 |  |
| 44 | polyadenylate-binding protein 1 | 27 | 1 | 1 | 435018 | Translation is an essential cellular process whose deregulation is associated with alterations in cell growth, cell cycle progression, and cell death responses. Translation initiation control is usurped upon viral infection and is deregulated in many human cancers. Over-expression of certain translation factors can lead to malignant transformation and many of the components of the translational apparatus are over-expressed in human cancers. These results validate translation initiation as a potential chemotherapeutic target.                                    | polyadenylate-binding protein 1   |                 |  |
| 45 | geminin                         | 27 | 1 | 1 | 463097 | geminin are critical regulators of this process and their misregulation results in DNA re-replication in normal and cancer cells.                                                                                                                                                                                                                                                                                                                                                                                                                                                     | geminin                           | Research target |  |
| 46 | cysteine protease ATG4B         | 27 | 1 | 1 | 504756 | Chemical modulators of autophagy are essentially non-existent, with the only available agent, 3-methyladenine, requiring millimolar concentrations to inhibit class III phosphatidyl inositol kinases (PI3Ks) involved in autophagy.                                                                                                                                                                                                                                                                                                                                                  | cysteine protease ATG4B isoform a |                 |  |

|    |                                              |    |   |   |      |  |                                                                                                                                                                                                           |  |  |  |
|----|----------------------------------------------|----|---|---|------|--|-----------------------------------------------------------------------------------------------------------------------------------------------------------------------------------------------------------|--|--|--|
|    |                                              |    |   |   |      |  | A need exists for chemicals that target specific components of the autophagy machinery -- both for use as research tools for addressing questions about the role of autophagy in diseases such as cancer. |  |  |  |
| 47 | Cytotoxicity, SK-N-SH                        | 27 | 1 | 1 | 435  |  | Organism: Homo sapiens, human / Tissue: brain; derived from metastatic site: bone marrow / Disease: neuroblastoma.                                                                                        |  |  |  |
| 48 | Cytotoxicity, Renal Proximal Tubule          | 27 | 1 | 1 | 545  |  | Toxicidade renal. Renal proximal tubule cells which are derived from normal kidney cells freshly isolated from rat.                                                                                       |  |  |  |
| 49 | Cytotoxicity, RAS-Dependent BJeLR Fibroblast | 27 | 1 | 1 | 2610 |  | Organism: Homo sapiens, human / Cell Type: fibroblast / Tissue: skin; foreskin / Disease: normal.                                                                                                         |  |  |  |
| 50 | Cytotoxicity, H-4-II-E                       | 27 | 1 | 1 | 543  |  | Organism: Rattus norvegicus, rat / Tissue: liver / Disease: hepatoma.                                                                                                                                     |  |  |  |

**Table S2:** Biological activities better classified by the Naïve Bayes method for the group of twenty seven lignans analyzed. The column #Pairs represents the number of occurrences of compounds/models with values of **Pa-Pi greater or equal to 0.35**, with Pa-Pi minimum (pessimistic range) greater than zero. The column #model shows the total number of different models associated with activity class. The score was calculated by dividing the #Pairs by 27, and dividing by the root square of the number of models. The Best Model column shows one of the class models. The Activity column is related to the number of active and inactive compounds found in relation to the number of active and inactive compounds belonging to the same activity class.

| Entry | Activity Class                                             | #Pairs | #models | Score | Best model               | Activity             | Descrição                                                                                                                                                                                                                                                                                                                                                                                                                                                                                                                | Targets                                        | TTD-Disease(2017)            |
|-------|------------------------------------------------------------|--------|---------|-------|--------------------------|----------------------|--------------------------------------------------------------------------------------------------------------------------------------------------------------------------------------------------------------------------------------------------------------------------------------------------------------------------------------------------------------------------------------------------------------------------------------------------------------------------------------------------------------------------|------------------------------------------------|------------------------------|
| 1     | Anti-Inflammatory model                                    | 454    | 30      | 3.07  | 435020                   | act=4/5<br>inact=2/5 | NF-kB activation. Many cellular pathways leading to activation of NF-kB-family transcription factors have been identified to be participating in host-defense, immunity, inflammation, and cancer.                                                                                                                                                                                                                                                                                                                       |                                                |                              |
| 2     | <b>Bacteria, Salmonella Typhimurium</b>                    | 168    | 8       | 2.2   | 2839                     |                      |                                                                                                                                                                                                                                                                                                                                                                                                                                                                                                                          |                                                |                              |
| 3     | Mycobacterium tuberculosis                                 | 291    | 29      | 2     | 743073                   |                      |                                                                                                                                                                                                                                                                                                                                                                                                                                                                                                                          | bioA                                           |                              |
| 4     | Plasmodium falciparum                                      | 377    | 53      | 1.92  | 2302                     | act=1/4<br>inact=1/3 |                                                                                                                                                                                                                                                                                                                                                                                                                                                                                                                          | lactate dehydrogenase                          |                              |
| 5     | Herpes simplex virus Virion Protein 16 (counterscreen)     | 154    | 9       | 1.9   | 624395                   | act=1/1<br>inact=3/4 | Interference with HTS                                                                                                                                                                                                                                                                                                                                                                                                                                                                                                    | transactivating tegument protein VP16          |                              |
| 6     | Virus, HIV-1                                               | 211    | 19      | 1.79  | 651939                   |                      |                                                                                                                                                                                                                                                                                                                                                                                                                                                                                                                          | Envelope surface glycoprotein gp160, precursor |                              |
| 7     | Fungus, Candida albicans                                   | 195    | 18      | 1.7   | Fungus, Candida albicans | act=2/3<br>inact=0/1 |                                                                                                                                                                                                                                                                                                                                                                                                                                                                                                                          |                                                |                              |
| 8     | TOR pathway GFP-fusion proteins [Saccharomyces cerevisiae] | 151    | 11      | 1.69  | 488808                   |                      | TORC1 is a central hub of a signaling network that couples cues from hormones and growth factors (in mammalian cells), energy and stresses, and the abundance of nutrients, to cell growth and proliferation. Importantly, in this context, most negative regulators of mammalian TORC1 (mTORC1) have been previously identified as tumor suppressor gene products, while many positive regulators of mTORC1 have been identified as proto-oncoproteins and/or are found at elevated levels in tumor-derived cell lines. | RPL19A                                         |                              |
| 9     | Trypanosoma                                                | 226    | 27      | 1.61  | 686980                   |                      | Chagas' disease; Trypanolytic infections                                                                                                                                                                                                                                                                                                                                                                                                                                                                                 | phosphoglycerate kinase                        |                              |
| 10    | Antiparasitic, Caenorhabditis elegans                      | 135    | 10      | 1.58  | 651563                   |                      | Antiparasitic, Caenorhabditis elegans                                                                                                                                                                                                                                                                                                                                                                                                                                                                                    | Protein skinhead-1                             |                              |
| 11    | <b>Bacteria, Pseudomonas aeruginosa</b>                    | 143    | 13      | 1.47  | 468996                   |                      |                                                                                                                                                                                                                                                                                                                                                                                                                                                                                                                          | Elastase                                       |                              |
| 12    | sphingosine 1-phosphate receptor 1                         | 96     | 6       | 1.45  | 1821                     |                      | Agonists of S1P1 would be of interest in the enhancement of endothelial barriers and therefore                                                                                                                                                                                                                                                                                                                                                                                                                           | sphingosine 1-phosphate receptor 1             | Acne vulgaris; Advanced non- |

|    |                                        |    |   |      |        |                      |                                                                                                                                                                                                                                                                                                                                                                                                    |                            |                                                                                                                                                                                                                                                                                                                                                      |
|----|----------------------------------------|----|---|------|--------|----------------------|----------------------------------------------------------------------------------------------------------------------------------------------------------------------------------------------------------------------------------------------------------------------------------------------------------------------------------------------------------------------------------------------------|----------------------------|------------------------------------------------------------------------------------------------------------------------------------------------------------------------------------------------------------------------------------------------------------------------------------------------------------------------------------------------------|
|    |                                        |    |   |      |        |                      | potentially for the treatment of multiple sclerosis, transplant rejection and adult respiratory distress syndrome.                                                                                                                                                                                                                                                                                 |                            | small cell lung cancer;<br>Autoimmune diabetes; Cancer;<br>Cardiovascular disorder;<br>Cutaneous lupus erythematosus;<br>Hepatocellular carcinoma;<br>Multiple sclerosis;<br>Immune disorder;<br>Inflammatory disease; Macular degeneration;<br>Multiple sclerosis;<br>Primary progressive multiple sclerosis;<br>Psoriasis;<br>Rheumatoid arthritis |
| 13 | Hsf1 protein                           | 87 | 5 | 1.44 | 435004 |                      | Function as a stress-inducible and DNA-binding transcription factor that plays a central role in the transcriptional activation of the heat shock response (HSR), leading to the expression of a large class of molecular chaperones heat shock proteins (HSPs) that protect cells from cellular insults' damage. Involved in stress-induced cancer cell proliferation in a IER5-dependent manner. | Hsf1 protein               | Amyotrophic lateral sclerosis;<br>Atrial fibrillation;<br>Cancer; Diabetes;<br>Diabetic neuropathy;<br>Gastrointestinal cancers; Herpes simplex virus infection;<br>Leukemia;<br>Metastasis                                                                                                                                                          |
| 14 | <b>Bacteria, Staphylococcus aureus</b> | 66 | 3 | 1.41 | 700    |                      |                                                                                                                                                                                                                                                                                                                                                                                                    |                            |                                                                                                                                                                                                                                                                                                                                                      |
| 15 | Agonista, p53                          | 63 | 3 | 1.35 | 720552 | act=2/2<br>inact=2/2 | p53, a tumor suppressor protein, is activated following cellular insult, including DNA damage and other cellular stresses. The activation of p53 regulates cell fate by inducing DNA repair, cell cycle arrest, apoptosis, or cellular senescence. The activation of p53, therefore, is a good indicator of DNA damage and other cellular stresses.                                                | Cellular tumor antigen p53 | Acute myeloid leukemia; Cancer;<br>Colorectal cancer;<br>Head and neck cancer;<br>Hematological malignancies; Late-stage solid tumors;<br>Oral cavity cancer;<br>Renal artery disease; Solid tumours; Toxicity;<br>Hearing disorder                                                                                                                  |

|    |                                        |     |    |      |        |                      |                                                                                                                                                                                                                                                                                                                                                                                                                                                                                                                                                                                                   |                                              |  |
|----|----------------------------------------|-----|----|------|--------|----------------------|---------------------------------------------------------------------------------------------------------------------------------------------------------------------------------------------------------------------------------------------------------------------------------------------------------------------------------------------------------------------------------------------------------------------------------------------------------------------------------------------------------------------------------------------------------------------------------------------------|----------------------------------------------|--|
| 16 | miR-21                                 | 51  | 2  | 1.34 | 2508   |                      | miR-21-3p plays a crucial oncogenic role in cell metastasis during oral squamous cell carcinoma progression. High miR21 expression is associated with renal cell carcinoma. MIR21 promotes PTEN expression in colorectal cancer. mir-21 overexpression is associated with hepatocellular carcinoma. miR-21 overexpression promotes the migration and invasion of glioma cells. Sox2 is a crucial mediator in miR-21-induced migration and invasion in human glioma cells. miR-21/Sox2-induced migration/invasion of glioma cells is involved in the activation of the Wnt/beta-catenin signaling. |                                              |  |
| 17 | GLI family zinc finger 1               | 71  | 4  | 1.31 | 651994 |                      | Glioma, B-cell lymphoma, sarcoma. Medulloblastoma, the most common pediatric brain tumor. Hh pathway dysregulation has been linked to tumors of the brain, skin, pancreas, breast, ovaries, and blood, and small molecules targeting this pathway are now being pursued as anti-cancer therapies.                                                                                                                                                                                                                                                                                                 | Gli1                                         |  |
| 18 | senrin-specific protease 8             | 85  | 6  | 1.29 | 488903 |                      | Potent and selective SENP8 chemical probes would provide invaluable tools to help elucidate the function of this therapeutically important enzyme, and may ultimately lead to the development of new anticancer therapies.                                                                                                                                                                                                                                                                                                                                                                        | senrin-specific protease 8                   |  |
| 19 | Cytotoxicity, HEK293                   | 199 | 33 | 1.28 | 488924 | act=1/3<br>inact=0/9 | Organism: Homo sapiens, human / Tissue: embryonic kidney . Toxicidade renal                                                                                                                                                                                                                                                                                                                                                                                                                                                                                                                       |                                              |  |
| 20 | serine/threonine-protein kinase 33     | 60  | 3  | 1.28 | 2821   |                      | The serine/threonine kinase 33, STK33, has been identified and shown to be required for the survival and proliferation of mutant KRAS-dependent cells involved in cancer.                                                                                                                                                                                                                                                                                                                                                                                                                         | serine/threonine-protein kinase 33 isoform a |  |
| 21 | regulator of G-protein signaling 4     | 88  | 7  | 1.23 | 492999 |                      | RGS4 has potential involvement in the pathology of pain where RGS4 mRNA is upregulated in response to nerve injury models of neuropathic pain [8]. Additionally, RGS4 may be involved in negative regulation of insulin release from pancreatic beta cells, indicated by enhanced glucose tolerance and insulin release in pancreatic beta-cell-specific RGS4 k/o mice. Also, reduced expression of RGS4 has been correlated with schizophrenia.                                                                                                                                                  | regulator of G-protein signaling 4 isoform 2 |  |
| 22 | muscleblind-like protein 1             | 47  | 2  | 1.23 | 493199 |                      | Dystrophia myotonica 1 (DM1). A muscular disorder characterized by myotonia, muscle wasting in the distal extremities, cataract, hypogonadism, defective endocrine functions, male baldness and cardiac arrhythmias.                                                                                                                                                                                                                                                                                                                                                                              | muscleblind-like protein 1 isoform a         |  |
| 23 | Anticancer, Acute myelogenous leukemia | 80  | 6  | 1.21 | 2068   |                      |                                                                                                                                                                                                                                                                                                                                                                                                                                                                                                                                                                                                   | tyrosine-protein phosphatase non-            |  |

|    |                                           |    |   |      |        |                      |                                                                                                                                                                                                                                                                                                                                                                                                                                                                                                                                                                                                                                                                                                                       |                                           |  |
|----|-------------------------------------------|----|---|------|--------|----------------------|-----------------------------------------------------------------------------------------------------------------------------------------------------------------------------------------------------------------------------------------------------------------------------------------------------------------------------------------------------------------------------------------------------------------------------------------------------------------------------------------------------------------------------------------------------------------------------------------------------------------------------------------------------------------------------------------------------------------------|-------------------------------------------|--|
|    |                                           |    |   |      |        |                      |                                                                                                                                                                                                                                                                                                                                                                                                                                                                                                                                                                                                                                                                                                                       | receptor type 7 isoform 2                 |  |
| 24 | Yeast Lifespan                            | 73 | 5 | 1.21 | 809    |                      |                                                                                                                                                                                                                                                                                                                                                                                                                                                                                                                                                                                                                                                                                                                       |                                           |  |
| 25 | Steroid Receptor Coactivator 3            | 46 | 2 | 1.2  | 602166 | act=2/2<br>inact=0/0 | Given the central role that SRC-3 plays in breast and other cancers, the search for small molecule agents that target SRC-1 and SRC-3 represent an innovative and potentially effective strategy to identify agents to treat hormone-refractory breast cancers and other cancers where these coactivators are overexpressed. Compounds that target the function of steroid receptor coactivator 3 (SRC-3) protein promise to be different because cancer cells are less likely to bypass the comprehensive disruption of multiple growth factor signaling systems that result from the loss of SRC-3 function.                                                                                                        | nuclear receptor coactivator 3 isoform a  |  |
| 26 | Virus, Herpes                             | 45 | 2 | 1.18 | 435023 |                      | Virus, Herpes                                                                                                                                                                                                                                                                                                                                                                                                                                                                                                                                                                                                                                                                                                         | LANA                                      |  |
| 27 | dual specificity protein phosphatase 3    | 83 | 7 | 1.16 | 2684   |                      | dual specificity protein phosphatase 3. The protein encoded by this gene is a member of the dual specificity protein phosphatase subfamily. These phosphatases inactivate their target kinases by dephosphorylating both the phosphoserine/threonine and phosphotyrosine residues. They negatively regulate members of the mitogen-activated protein (MAP) kinase superfamily (MAPK/ERK, SAPK/JNK, p38), which are associated with cellular proliferation and differentiation.                                                                                                                                                                                                                                        | dual specificity protein phosphatase 3    |  |
| 28 | Mitochondria, permeability                | 54 | 3 | 1.15 | 743360 |                      | Mitochondria permeability Transition. In 1976, Hunter et al3 discovered a phenomenon called permeability transition (PT) as a result of the opening of a channel, the permeability transition pore (PTP), which results in a modification in permeability properties of the mitochondrial inner membrane (IM). Since PT description, major efforts have been accomplished to decipher its physiological role and, more recently, its role in cell death and pathology. This allowed its recognition as a potent pharmacological target for diseases associated with mitochondrial dysfunction and excessive cell death (eg, ischemia/reperfusion [I/R], heart failure, cardiotoxicity, cancer, and neurodegeneration. |                                           |  |
| 29 | DNA damage-inducible transcript 3 protein | 43 | 2 | 1.13 | 504437 |                      | diabetes, Alzheimer's disease, and Parkinson's disease, to hemophilia, lysosomal storage diseases, and alpha-1 antitrypsin deficiency.                                                                                                                                                                                                                                                                                                                                                                                                                                                                                                                                                                                | DNA damage-inducible transcript 3 protein |  |
| 30 | Cytotoxicity, MAGI-CCR5                   | 43 | 2 | 1.13 | 504393 |                      | The parental MAGI cell line is a HeLa cell clone expressing human CD4 and HIV-LTR-β gal. MAGI-                                                                                                                                                                                                                                                                                                                                                                                                                                                                                                                                                                                                                        |                                           |  |

|    |                                                                  |     |    |      |            |                      |                                                                                                                                                                                                                                                                                                                                                                                                                                                                                                                                                                                                                                                                                                      |                                               |                                                              |
|----|------------------------------------------------------------------|-----|----|------|------------|----------------------|------------------------------------------------------------------------------------------------------------------------------------------------------------------------------------------------------------------------------------------------------------------------------------------------------------------------------------------------------------------------------------------------------------------------------------------------------------------------------------------------------------------------------------------------------------------------------------------------------------------------------------------------------------------------------------------------------|-----------------------------------------------|--------------------------------------------------------------|
|    |                                                                  |     |    |      |            |                      | CCR-5 cells are a clone of MAGI cells that express the human chemokine receptor, CCR5                                                                                                                                                                                                                                                                                                                                                                                                                                                                                                                                                                                                                |                                               |                                                              |
| 31 | ADMET, HIA                                                       | 43  | 2  | 1.13 | ADMET, HIA |                      | Intestinal Absorption                                                                                                                                                                                                                                                                                                                                                                                                                                                                                                                                                                                                                                                                                |                                               |                                                              |
| 32 | nuclear receptor subfamily 0 group B member 1                    | 42  | 2  | 1.1  | 687017     | act=3/3<br>inact=1/1 |                                                                                                                                                                                                                                                                                                                                                                                                                                                                                                                                                                                                                                                                                                      | nuclear receptor subfamily 0 group B member 1 |                                                              |
| 33 | Focal adhesion kinase 1                                          | 42  | 2  | 1.1  | 810        |                      | Non-receptor protein-tyrosine kinase that plays an essential role in regulating cell migration, adhesion, spreading, reorganization of the actin cytoskeleton, formation and disassembly of focal adhesions and cell protrusions, cell cycle progression, cell proliferation and apoptosis. Required for early embryonic development and placenta development. Required for embryonic angiogenesis, normal cardiomyocyte migration and proliferation, and normal heart development. Regulates axon growth and neuronal cell migration, axon branching and synapse formation; required for normal development of the nervous system. Plays a role in osteogenesis and differentiation of osteoblasts. |                                               | Cancer; Late-stage solid tumors; Mesothelioma; Solid tumours |
| 34 | Antimicrobial, E. coli                                           | 42  | 2  | 1.1  | 638        |                      | Antimicrobial                                                                                                                                                                                                                                                                                                                                                                                                                                                                                                                                                                                                                                                                                        |                                               |                                                              |
| 35 | ADP Fluorescence Polarization Displacement Assay (counterscreen) | 42  | 2  | 1.1  | 2712       |                      | 0                                                                                                                                                                                                                                                                                                                                                                                                                                                                                                                                                                                                                                                                                                    |                                               |                                                              |
| 36 | Cytotoxicity, HepG2                                              | 159 | 29 | 1.09 | 720535     |                      | Organism: Homo sapiens, human / Tissue: liver / Disease: hepatocellular carcinoma. Toxicidade hepática. Drug-induced liver injury is a major health problem that impacts the pharmaceutical industry, drug regulatory agencies and doctors. Drug induced hepatotoxicity accounts for more than 50% of acute liver failure, and is the major cause of drug withdrawals. Because of the significant patient morbidity and mortality, many drugs have been withdrawn from the market, including bromfenac, ebrotidine, and troglitazone.                                                                                                                                                                |                                               |                                                              |
| 37 | Virus, Hepatitis C                                               | 72  | 6  | 1.09 | 2173       |                      |                                                                                                                                                                                                                                                                                                                                                                                                                                                                                                                                                                                                                                                                                                      | NS3, partial                                  |                                                              |
| 38 | Cytotoxicity, NIH3T3                                             | 87  | 9  | 1.07 | 651742     |                      | Organism: Mus musculus, mouse / Cell Type: fibroblast / Tissue: embryo.                                                                                                                                                                                                                                                                                                                                                                                                                                                                                                                                                                                                                              |                                               |                                                              |
| 39 | SUMO1/sentrin specific peptidase 6                               | 50  | 3  | 1.07 | 504492     |                      | Several studies implicated the role of various SENP isoforms in the development of various diseases, including prostate cancer, thyroid cancer, colon cancer, pancreatic cancer, atherosclerosis and heart diseases. Especially, numerous studies indicated the role of SENPs in prostate cancer development.                                                                                                                                                                                                                                                                                                                                                                                        | SUMO-1-specific protease                      |                                                              |
| 40 | Luciferase (counterscreen)                                       | 64  | 5  | 1.06 | 720522     |                      | Interference with HTS                                                                                                                                                                                                                                                                                                                                                                                                                                                                                                                                                                                                                                                                                | Photinus pyralis luciferase                   |                                                              |

|    |                                                |    |   |      |                                            |                      |                                                                                                                                                                                                                                                                                                                                                                                                                                                                                                                                                                                                                                                |                                                                                            |                                                                                                   |
|----|------------------------------------------------|----|---|------|--------------------------------------------|----------------------|------------------------------------------------------------------------------------------------------------------------------------------------------------------------------------------------------------------------------------------------------------------------------------------------------------------------------------------------------------------------------------------------------------------------------------------------------------------------------------------------------------------------------------------------------------------------------------------------------------------------------------------------|--------------------------------------------------------------------------------------------|---------------------------------------------------------------------------------------------------|
| 41 | corticotropin releasing factor-binding protein | 57 | 4 | 1.06 | 602180                                     |                      |                                                                                                                                                                                                                                                                                                                                                                                                                                                                                                                                                                                                                                                | corticotropin releasing factor-binding protein; corticotropin-releasing hormone receptor 2 |                                                                                                   |
| 42 | alkaline phosphatase, placental-like           | 57 | 4 | 1.06 | 493126                                     |                      | Alkaline phosphatase (EC 3.1.3.1) (APs) catalyze the hydrolysis of phosphomonoesters, releasing inorganic phosphate and alcohol. IAP expression is largely restricted to the gut, especially to the epithelial cells (enterocytes) of the small intestinal mucosa. While the biological implications of this inhibition are not known, these inhibitors have proven to be useful in the differential determination of AP isozymes as important diagnostic markers in many diseases.                                                                                                                                                            | alkaline phosphatase, placental-like preproprotein                                         |                                                                                                   |
| 43 | Cytotoxicity, isogenic chicken DT40 cell line  | 49 | 3 | 1.05 | 743015                                     | act=1/6<br>inact=0/0 | Identification of genotoxic compounds                                                                                                                                                                                                                                                                                                                                                                                                                                                                                                                                                                                                          |                                                                                            |                                                                                                   |
| 44 | Microtubule-associated protein tau             | 40 | 2 | 1.05 | 1720                                       |                      | The microtubule-associated protein tau is an abundant protein in the axons of neurons that stabilizes microtubules. With its ability to modulate microtubule dynamics, tau contributes directly or indirectly, to key structural and regulatory cellular functions. Under pathological conditions, tau becomes sequestered into insoluble aggregates called neurofibrillary tangles. This phenomenon is believed to have pathological consequences by promoting axonal transport deficits that ultimately lead to synaptic dysfunction and neuronal loss.                                                                                      | Microtubule-associated protein tau                                                         | Alzheimer disease; Central nervous system disease; Cognitive disorders; Neurodegenerative disease |
| 45 | Mitochondria, disruptor membrane potential     | 63 | 5 | 1.04 | Mitochondria, disruptor membrane potential | act=2/4<br>inact=0/0 | Mitochondrial membrane potential (MMP), one of the parameters for mitochondrial function, is generated by mitochondrial electron transport chain that creates an electrochemical gradient by a series of redox reactions. This gradient drives the synthesis of ATP, a crucial molecule for various cellular processes. Measuring MMP in living cells is commonly used to assess the effect of chemicals on mitochondrial function. A homogenous cell-based MMP assay using a water soluble mitochondrial membrane potential sensor (Mito-MPS dye developed by BD Biosciences) was used to evaluate chemically induced mitochondrial toxicity. |                                                                                            |                                                                                                   |
| 46 | Plasmodium berghei                             | 69 | 6 | 1.04 | 540269                                     |                      | Malaria                                                                                                                                                                                                                                                                                                                                                                                                                                                                                                                                                                                                                                        | glucose-6-phosphate dehydrogenase-6-phospho-gluconolactonase                               |                                                                                                   |

|    |                             |     |    |      |        |  |                                                                                                                                                                                                                                                                                                                                                                                                                                                                                                                                                                                                                                       |                             |                                                     |
|----|-----------------------------|-----|----|------|--------|--|---------------------------------------------------------------------------------------------------------------------------------------------------------------------------------------------------------------------------------------------------------------------------------------------------------------------------------------------------------------------------------------------------------------------------------------------------------------------------------------------------------------------------------------------------------------------------------------------------------------------------------------|-----------------------------|-----------------------------------------------------|
| 47 | Cystic Fibrosis             | 69  | 6  | 1.04 | 624344 |  | Involved in the transport of chloride ions. May regulate bicarbonate secretion and salvage in epithelial cells by regulating the SLC4A7 transporter. Can inhibit the chloride channel activity of ANO1. Plays a role in the chloride and bicarbonate homeostasis during sperm epididymal maturation and capacitation.                                                                                                                                                                                                                                                                                                                 |                             | Cystic fibrosis; Diarrhea; HIV-associated diarrhoea |
| 48 | Cytotoxicity, L929          | 39  | 2  | 1.02 | 463117 |  | Organism: Mus musculus, mouse / Tissue: subcutaneous connective tissue; areolar and adipose /                                                                                                                                                                                                                                                                                                                                                                                                                                                                                                                                         |                             |                                                     |
| 49 | sentrin-specific protease 1 | 55  | 4  | 1.02 | 651690 |  | A growing body of evidence indicates that, SUMOylation plays key homeostatic roles in the androgen mediated development and function of the prostate both by restraining the transcriptional activity of the androgen receptor (AR) and by inducing the normal process of senescence, which is a growth-arrest program that limits the lifespan of mammalian cells and prevents tumor progression. Notably, recent data indicates that advanced prostate cancer cells, which are notoriously resistant to current therapies, evade SUMO-mediated homeostatic mechanisms through the specific upregulation of the SUMO protease SENP1. | sentrin-specific protease 1 |                                                     |
| 50 | Cytotoxicity, Vero Cells    | 106 | 15 | 1.01 | 1650   |  | Organism: Cercopithecus aethiops / Tissue: kidney / Disease: normal                                                                                                                                                                                                                                                                                                                                                                                                                                                                                                                                                                   |                             |                                                     |

**Table S3:** Best predict activity classes for lignans using both machine learning methods, SVM and Naïve Bayes. Activity classes were ordered according the best rank between the two methods and by the average rank. The columns Atives and Inactives concern the number of lignans that were experimentaly tested with some bioassay in the activity class. The EF (enrichment factor) column was calculated with the number of actives and inactives among classes selected and the total of actives and inactives among all classes.

| RANK | Activity Class                                             | SVM score | Bayes score | SVM rank | Bayes rank | Actives | Inactives | EF   | Description                                                                                                                                                                                                                                                                                                                                                                      |
|------|------------------------------------------------------------|-----------|-------------|----------|------------|---------|-----------|------|----------------------------------------------------------------------------------------------------------------------------------------------------------------------------------------------------------------------------------------------------------------------------------------------------------------------------------------------------------------------------------|
| 1    | Anti-Inflammatory model                                    | 2.22      | 3.07        | 2        | 1          | 5       | 5         | 1.21 | Several models targeting the following pathways: NFkappaB Translocation; NF-kB activation ; TNF inhibition ; STAT1 activation ; STAT3 activation ; Inhibition of TLR4 ; Inhibition of TLR4-MyD88 ; Inhibition of TLR2 ; Inhibition of TLR3-IRF3.                                                                                                                                 |
| 2    | Cytotoxicity, Human Lymphoblastoid Cells                   | 2.93      | 0.57        | 1        | 250        | 0       | 0         | 1.21 | lymphoblastoid cell line                                                                                                                                                                                                                                                                                                                                                         |
| 3    | Bacteria, Salmonella Typhimurium                           | 1.68      | 2.2         | 3        | 2          | 0       | 0         | 1.21 | Bacteria, Salmonella Typhimurium                                                                                                                                                                                                                                                                                                                                                 |
| 4    | Mycobacterium tuberculosis                                 | 1.46      | 2           | 10       | 3          | 0       | 2         | 1.01 | Mycobacterium tuberculosis                                                                                                                                                                                                                                                                                                                                                       |
| 5    | Plasmodium falciparum                                      | 1.49      | 1.92        | 8        | 4          | 4       | 3         | 1.14 | Plasmodium falciparum                                                                                                                                                                                                                                                                                                                                                            |
| 6    | Ape1 Endonuclease                                          | 1.65      | 0.75        | 4        | 155        | 0       | 0         | 1.14 | overexpression of APE1 in many cancers and resistance of these tumor cells to radio- and chemotherapy. Thus, targeting APE1 could improve the efficacy of current treatment paradigms by promoting selective sensitization or protection of diseased and normal cells, respectively.                                                                                             |
| 7    | Agonista, p53                                              | 1.6       | 1.35        | 5        | 15         | 2       | 2         | 1.15 | p53, a tumor suppressor protein, is activated following cellular insult, including DNA damage and other cellular stresses. The activation of p53 regulates cell fate by inducing DNA repair, cell cycle arrest, apoptosis, or cellular senescence. The activation of p53, therefore, is a good indicator of DNA damage and other cellular stresses.                              |
| 8    | Herpes simplex virus Virion Protein 16 (counterscreen)     | 1.26      | 1.9         | 17       | 5          | 1       | 4         | 1.03 | Interference with HTS                                                                                                                                                                                                                                                                                                                                                            |
| 9    | Virus, HIV-1                                               | 1.24      | 1.79        | 21       | 6          | 0       | 0         | 1.03 | Virus, HIV-1                                                                                                                                                                                                                                                                                                                                                                     |
| 10   | Genotoxicity, ATAD5                                        | 1.57      | 0.36        | 6        | 358        | 5       | 1         | 1.21 | ATPase family AAA domain-containing protein 5. Involved in DNA damage response. Involved in a RAD9A-related damage checkpoint, a pathway that is important in determining whether DNA damage is compatible with cell survival or whether it requires cell elimination by apoptosis. Modulates the RAD9A interaction with BCL2 and thereby induces DNA damages-induced apoptosis. |
| 11   | GLI family zinc finger 1                                   | 1.54      | 1.31        | 7        | 17         | 0       | 0         | 1.21 | Glioma, B-cell lymphoma, sarcoma. Medulloblastoma, the most common pediatric brain tumor. Hh pathway dysregulation has been linked to tumors of the brain, skin, pancreas, breast, ovaries, and blood, and small molecules targeting this pathway are now being pursued as anti-cancer therapies.                                                                                |
| 12   | Fungus, Candida albicans                                   | 0.64      | 1.7         | 154      | 7          | 3       | 1         | 1.27 | Fungus, Candida albicans                                                                                                                                                                                                                                                                                                                                                         |
| 13   | TOR pathway GFP-fusion proteins [Saccharomyces cerevisiae] | 1.08      | 1.69        | 29       | 8          | 0       | 0         | 1.27 | TORC1 is a central hub of a signaling network that couples cues from hormones and growth factors (in mammalian cells), energy and stresses, and the abundance of nutrients, to cell growth and proliferation. Most negative regulators of mammalian TORC1 (mTORC1) have been previously identified as tumor suppressor gene products, while many positive                        |

|    |                                                |      |      |     |     |   |   |      |                                                                                                                                                                                                                                                                                                                                                                                                                                                                                                                                                                                                                                                                                                                                                                                              |
|----|------------------------------------------------|------|------|-----|-----|---|---|------|----------------------------------------------------------------------------------------------------------------------------------------------------------------------------------------------------------------------------------------------------------------------------------------------------------------------------------------------------------------------------------------------------------------------------------------------------------------------------------------------------------------------------------------------------------------------------------------------------------------------------------------------------------------------------------------------------------------------------------------------------------------------------------------------|
|    |                                                |      |      |     |     |   |   |      | regulators of mTORC1 have been identified as proto-oncoproteins and/or are found at elevated levels in tumor-derived cell lines                                                                                                                                                                                                                                                                                                                                                                                                                                                                                                                                                                                                                                                              |
| 14 | Anticancer, RecQ-Like Dna Helicase 1 (RECQ1)   | 1.48 | 1.01 | 9   | 52  | 0 | 0 | 1.27 | Human RECQ1 Is a DNA Damage Responsive Protein Required for Genotoxic Stress Resistance and Suppression of Sister Chromatid Exchanges. Developing drugs that interfere with DNA repair, which could sensitize cancer cells to conventional therapy.                                                                                                                                                                                                                                                                                                                                                                                                                                                                                                                                          |
| 15 | Trypanosoma                                    | 0.66 | 1.61 | 145 | 9   | 0 | 0 | 1.27 | Chagas' disease; Trypanolytic infections                                                                                                                                                                                                                                                                                                                                                                                                                                                                                                                                                                                                                                                                                                                                                     |
| 16 | Antiparasitic, Caenorhabditis elegans          | 0.97 | 1.58 | 59  | 10  | 0 | 0 | 1.27 | Antiparasitic, Caenorhabditis elegans                                                                                                                                                                                                                                                                                                                                                                                                                                                                                                                                                                                                                                                                                                                                                        |
| 17 | Microphthalmia-associated transcription factor | 1.4  | 0.94 | 11  | 73  | 0 | 0 | 1.27 | MITF-related melanoma and renal cell carcinoma predisposition syndrome. nervous system disease, eye disease, genetic disorder, skin disease, metabolic disease                                                                                                                                                                                                                                                                                                                                                                                                                                                                                                                                                                                                                               |
| 18 | Bacteria, Pseudomonas aeruginosa               | 0.85 | 1.47 | 99  | 11  | 0 | 0 | 1.27 | Bacteria, Pseudomonas aeruginosa                                                                                                                                                                                                                                                                                                                                                                                                                                                                                                                                                                                                                                                                                                                                                             |
| 19 | sphingosine 1-phosphate receptor 1             | 0.36 | 1.45 | 276 | 12  | 0 | 0 | 1.27 | Agonists of S1P1 would be of interest in the enhancement of endothelial barriers and therefore potentially for the treatment of multiple sclerosis, transplant rejection and adult respiratory distress syndrome.                                                                                                                                                                                                                                                                                                                                                                                                                                                                                                                                                                            |
| 20 | Angiogenesis model                             | 1.37 | 0.39 | 12  | 345 | 2 | 1 | 1.3  | Co-culture of endothelial colony forming cells (ECFC) with adipose-derived stromal cells (ADSC)                                                                                                                                                                                                                                                                                                                                                                                                                                                                                                                                                                                                                                                                                              |
| 21 | Cytotoxicity, isogenic chicken DT40 cell line  | 1.37 | 1.05 | 13  | 43  | 6 | 0 | 1.44 | Identification of genotoxic compounds                                                                                                                                                                                                                                                                                                                                                                                                                                                                                                                                                                                                                                                                                                                                                        |
| 22 | Hsf1 protein                                   | 0.98 | 1.44 | 57  | 13  | 0 | 1 | 1.41 | Function as a stress-inducible and DNA-binding transcription factor that plays a central role in the transcriptional activation of the heat shock response (HSR), leading to the expression of a large class of molecular chaperones heat shock proteins (HSPs) that protect cells from cellular insults' damage. Involved in stress-induced cancer cell proliferation in a IER5-dependent manner.                                                                                                                                                                                                                                                                                                                                                                                           |
| 23 | Bacteria, Staphylococcus aureus                | 0.86 | 1.41 | 95  | 14  | 0 | 0 | 1.41 | Quorum sensing is a cell-to-cell communication system that permits members of a bacterial population to coordinate their behavior dependent on cell density. The mediators of this communication system are small, diffusible pheromones or autoinducers that are secreted by the bacteria and that accumulate extracellularly. At the appropriate concentration threshold that reflects a sufficient number or quorum of bacteria, the autoinducers signal gene expression programs that direct the coordinated action of the population. The list of bacterial pathogens that use this method of communication to regulate virulence is expanding and now includes some of the most common bacterial pathogens of humans including the medically important pathogen Staphylococcus aureus. |
| 24 | Cell Cycle Modulation (counterscreen)          | 1.34 | 0.26 | 14  | 428 | 2 | 0 | 1.45 | Cell Cycle Modulation (counterscreen)                                                                                                                                                                                                                                                                                                                                                                                                                                                                                                                                                                                                                                                                                                                                                        |
| 25 | serine/threonine-protein kinase 33             | 1.28 | 1.28 | 15  | 20  | 0 | 0 | 1.45 | The serine/threonine kinase 33, STK33, has been identified and shown to be required for the survival and proliferation of mutant KRAS-dependent cells involved in cancer.                                                                                                                                                                                                                                                                                                                                                                                                                                                                                                                                                                                                                    |
| 26 | muscleblind-like protein 1                     | 1.28 | 1.23 | 16  | 22  | 0 | 0 | 1.45 | Dystrophia myotonica 1 (DM1). A muscular disorder characterized by myotonia, muscle wasting in the distal extremities, cataract, hypogonadism, defective endocrine functions, male baldness and cardiac arrhythmias.                                                                                                                                                                                                                                                                                                                                                                                                                                                                                                                                                                         |
| 27 | miR-21                                         | 0.65 | 1.34 | 150 | 16  | 0 | 0 | 1.45 | miR-21-3p plays a crucial oncogenic role in cell metastasis during oral squamous cell carcinoma progression. High miR21 expression is associated with renal cell carcinoma. MIR21 promotes PTEN expression in colorectal cancer. mir-21 overexpression is associated with hepatocellular carcinoma. miR-21 overexpression promotes the migration and invasion of glioma cells. Sox2 is a crucial mediator in miR-21-induced migration and invasion in human glioma cells. miR-21/Sox2-induced migration/invasion of glioma cells is involved in the activation of the Wnt/beta-catenin signaling.                                                                                                                                                                                            |

|    |                                                                  |      |      |     |      |   |   |      |                                                                                                                                                                                                                                                                                                                                                                                                                                                                                                                                                                                                                |
|----|------------------------------------------------------------------|------|------|-----|------|---|---|------|----------------------------------------------------------------------------------------------------------------------------------------------------------------------------------------------------------------------------------------------------------------------------------------------------------------------------------------------------------------------------------------------------------------------------------------------------------------------------------------------------------------------------------------------------------------------------------------------------------------|
| 28 | sentrin-specific protease 8                                      | 0.59 | 1.29 | 182 | 18   | 0 | 0 | 1.45 | Potent and selective SENP8 chemical probes would provide invaluable tools to help elucidate the function of this therapeutically important enzyme, and may ultimately lead to the development of new anticancer therapies.                                                                                                                                                                                                                                                                                                                                                                                     |
| 29 | ADMET, Cytochrome P450 3A4                                       | 1.26 | 0.2  | 18  | 461  | 1 | 1 | 1.44 | ADMET, Cytochrome P450 3A4                                                                                                                                                                                                                                                                                                                                                                                                                                                                                                                                                                                     |
| 30 | Cytotoxicity, HEK293                                             | 0.93 | 1.28 | 70  | 19   | 3 | 9 | 1.28 | Organism: Homo sapiens, human / Tissue: embryonic kidney . Toxicidade renal                                                                                                                                                                                                                                                                                                                                                                                                                                                                                                                                    |
| 31 | Osteoporosis model                                               | 1.26 | 0.43 | 19  | 315  | 3 | 0 | 1.33 | Wnt potentiation module is to identify agents that may serve as novel medications for bone development and, specifically, osteoporosis                                                                                                                                                                                                                                                                                                                                                                                                                                                                         |
| 32 | regulator of G-protein signaling 8                               | 1.26 | 0.86 | 20  | 85   | 0 | 0 | 1.33 | Since GPCRs control numerous physiologic processes in diverse tissues, including brain, heart, liver, and lung, modulation of the RGS/G protein interaction has become an attractive target for drug discovery.                                                                                                                                                                                                                                                                                                                                                                                                |
| 33 | regulator of G-protein signaling 4                               | 0.91 | 1.23 | 84  | 21   | 0 | 0 | 1.33 | RGS4 has potential involvement in the pathology of pain where RGS4 mRNA is upregulated in response to nerve injury models of neuropathic pain [8]. Additionally, RGS4 may be involved in negative regulation of insulin release from pancreatic beta cells, indicated by enhanced glucose tolerance and insulin release in pancreatic beta-cell-specific RGS4 k/o mice. Also, reduced expression of RGS4 has been correlated with schizophrenia.                                                                                                                                                               |
| 34 | Agonista, estrogen receptor alpha (ER-alpha)                     | 1.24 | 0.15 | 22  | 506  | 0 | 2 | 1.29 | Estrogen receptor alpha. Estrogen insensitivity syndrome is a very rare condition characterized by a defective ER $\alpha$ that is insensitive to estrogens. The clinical presentation of a female was observed to include absence of breast development and other female secondary sexual characteristics at puberty, hypoplastic uterus, primary amenorrhea, enlarged multicystic ovaries and associated lower abdominal pain, mild hyperandrogenism (manifested as cystic acne), and delayed bone maturation as well as an increased rate of bone turnover.                                                 |
| 35 | Anticancer, Acute myelogenous leukemia                           | 0.48 | 1.21 | 216 | 23   | 0 | 0 | 1.29 | Anticancer, Acute myelogenous leukemia                                                                                                                                                                                                                                                                                                                                                                                                                                                                                                                                                                         |
| 36 | peripheral myelin protein 22                                     | 1.23 | 0    | 23  | 1000 | 2 | 0 | 1.33 | Destabilization of myelin and neuropathic disorders, such as Charcot–Marie–Tooth type 1A (CMT1A), Dejerine–Sottas disease, and Hereditary Neuropathy with Liability to Pressure Palsy (HNPP)                                                                                                                                                                                                                                                                                                                                                                                                                   |
| 37 | Yeast Lifespan                                                   | 0.5  | 1.21 | 208 | 24   | 0 | 0 | 1.33 | Yeast Lifespan                                                                                                                                                                                                                                                                                                                                                                                                                                                                                                                                                                                                 |
| 38 | Antagonista, estrogen receptor alpha (ER-alpha)                  | 1.15 | 0.36 | 24  | 356  | 2 | 6 | 1.25 | Estrogen receptor alpha. Estrogen insensitivity syndrome is a very rare condition characterized by a defective ER $\alpha$ that is insensitive to estrogens. The clinical presentation of a female was observed to include absence of breast development and other female secondary sexual characteristics at puberty, hypoplastic uterus, primary amenorrhea, enlarged multicystic ovaries and associated lower abdominal pain, mild hyperandrogenism (manifested as cystic acne), and delayed bone maturation as well as an increased rate of bone turnover.                                                 |
| 39 | Steroid Receptor Coactivator 3                                   | 0.75 | 1.2  | 118 | 25   | 2 | 0 | 1.28 | Given the central role that SRC-3 plays in breast and other cancers, the search for small molecule agents that target SRC-1 and SRC-3 represent an innovative and potentially effective strategy to identify agents to treat hormone-refractory breast cancers and other cancers where these coactivators are overexpressed. Compounds that target the function of steroid receptor coactivator 3 (SRC-3) protein promise to be different because cancer cells are less likely to bypass the comprehensive disruption of multiple growth factor signaling systems that result from the loss of SRC-3 function. |
| 40 | 1-acylglycerol-3-phosphate O-acyltransferase ABHD5               | 1.13 | 0.3  | 25  | 385  | 0 | 2 | 1.25 | lipid disorders such as obesity, diabetes, and cardiovascular disease                                                                                                                                                                                                                                                                                                                                                                                                                                                                                                                                          |
| 41 | ADP Fluorescence Polarization Displacement Assay (counterscreen) | 1.13 | 1.1  | 26  | 35   | 0 | 0 | 1.25 | ADP Fluorescence Polarization Displacement Assay (counterscreen)                                                                                                                                                                                                                                                                                                                                                                                                                                                                                                                                               |

|    |                                           |      |      |      |     |    |   |      |                                                                                                                                                                                                                                                                                                                                                                                                                                                                                                                                                                                                                                                                                                                                   |
|----|-------------------------------------------|------|------|------|-----|----|---|------|-----------------------------------------------------------------------------------------------------------------------------------------------------------------------------------------------------------------------------------------------------------------------------------------------------------------------------------------------------------------------------------------------------------------------------------------------------------------------------------------------------------------------------------------------------------------------------------------------------------------------------------------------------------------------------------------------------------------------------------|
| 42 | Virus, Herpes                             | 0.68 | 1.18 | 137  | 26  | 0  | 0 | 1.25 | Virus, Herpes                                                                                                                                                                                                                                                                                                                                                                                                                                                                                                                                                                                                                                                                                                                     |
| 43 | dual specificity protein phosphatase 3    | 0.49 | 1.16 | 212  | 27  | 0  | 0 | 1.25 | dual specificity protein phosphatase 3. The protein encoded by this gene is a member of the dual specificity protein phosphatase subfamily. These phosphatases inactivate their target kinases by dephosphorylating both the phosphoserine/threonine and phosphotyrosine residues. They negatively regulate members of the mitogen-activated protein (MAP) kinase superfamily (MAPK/ERK, SAPK/JNK, p38), which are associated with cellular proliferation and differentiation.                                                                                                                                                                                                                                                    |
| 44 | Giardia lamblia                           | 1.09 | 0.64 | 27   | 220 | 0  | 0 | 1.25 | Giardia lamblia                                                                                                                                                                                                                                                                                                                                                                                                                                                                                                                                                                                                                                                                                                                   |
| 45 | Anticancer, Leukemia                      | 1.08 | 0.75 | 28   | 151 | 11 | 5 | 1.32 | Anticancer, Leukemia                                                                                                                                                                                                                                                                                                                                                                                                                                                                                                                                                                                                                                                                                                              |
| 46 | Mitochondria, permeability                | 0.09 | 1.15 | 443  | 28  | 0  | 0 | 1.32 | Mitochondria permeability Transition. In 1976, Hunter et al <sup>3</sup> discovered a phenomenon called permeability transition (PT) as a result of the opening of a channel, the permeability transition pore (PTP), which results in a modification in permeability properties of the mitochondrial inner membrane (IM). Since PT description, major efforts have been accomplished to decipher its physiological role and, more recently, its role in cell death and pathology. This allowed its recognition as a potent pharmacological target for diseases associated with mitochondrial dysfunction and excessive cell death (eg, ischemia/reperfusion [I/R], heart failure, cardiotoxicity, cancer, and neurodegeneration. |
| 47 | DNA damage-inducible transcript 3 protein | 0.18 | 1.13 | 381  | 29  | 0  | 0 | 1.32 | diabetes, Alzheimer's disease, and Parkinson's disease, to hemophilia, lysosomal storage diseases, and alpha-1 antitrypsin deficiency.                                                                                                                                                                                                                                                                                                                                                                                                                                                                                                                                                                                            |
| 48 | Antagonista, androgen receptor (AR)       | 1.08 | 0.67 | 30   | 212 | 4  | 4 | 1.31 | Androgen receptor. The normal development and maintenance of the prostate is dependent on androgen acting through the androgen receptor (AR). AR remains important in the development and progression of prostate cancer. AR ligands are widely used in a variety of clinical applications (i.e., agonists are employed for hypogonadism, while antagonists are used for prostate cancer therapy).                                                                                                                                                                                                                                                                                                                                |
| 49 | Cytotoxicity, MAGI-CCR5                   | 0    | 1.13 | 1000 | 30  | 0  | 0 | 1.31 | The parental MAGI cell line is a HeLa cell clone expressing human CD4 and HIV-LTR-β gal. MAGI-CCR-5 cells are a clone of MAGI cells that express the human chemokine receptor, CCR5                                                                                                                                                                                                                                                                                                                                                                                                                                                                                                                                               |
| 50 | ADMET, HIA                                | 0.24 | 1.13 | 335  | 31  | 0  | 0 | 1.31 | Intestinal Absorption                                                                                                                                                                                                                                                                                                                                                                                                                                                                                                                                                                                                                                                                                                             |

**Table S4:** Bioassays used to validate the bioactivity predictions of lignans. All lignanas were excluded from the dataset before the model were built.

| Entry | PubChem Bioassay |                                                                                                                       |         |         |          | Modeling Information    |             |             |                     |                   |
|-------|------------------|-----------------------------------------------------------------------------------------------------------------------|---------|---------|----------|-------------------------|-------------|-------------|---------------------|-------------------|
|       | AID              | Title                                                                                                                 | Source  | Lignans |          | Activity Class          | AUC SVM     | AUC Bayes   | Number of compounds | Number of actives |
|       |                  |                                                                                                                       |         | Active  | Inactive |                         |             |             |                     |                   |
| 1     | 111              | NCI human tumor cell line growth inhibition assay. Data for the P388 Leukemia cell line                               | DTP/NCI | 3       | 0        | Anticancer, Leukemia    | 0.78±0.025  | 0.687±0.029 | 620                 | 153               |
| 2     | 117              | NCI human tumor cell line growth inhibition assay. Data for the P388/ADR Leukemia cell line                           | DTP/NCI | 3       | 0        | Anticancer, Leukemia    | 0.745±0.028 | 0.648±0.032 | 614                 | 138               |
| 3     | 127              | NCI human tumor cell line growth inhibition assay. Data for the SN12K1 Renal cell line                                | DTP/NCI | 3       | 0        | Anticancer, Renal tumor | 0.808±0.024 | 0.671±0.033 | 633                 | 117               |
| 4     | 190              | NCI In Vivo Anticancer Drug Screen. Data for tumor model Lymphoma AKR (Transplanted) (intraperitoneal) in AKR/Lw mice | DTP/NCI | 0       | 3        | Anticancer, Lymphoma    | 0.863±0.046 | 0.86±0.047  | 150                 | 19                |

|    |     |                                                                                                                                                     |                                                           |   |   |                                       |             |             |       |     |
|----|-----|-----------------------------------------------------------------------------------------------------------------------------------------------------|-----------------------------------------------------------|---|---|---------------------------------------|-------------|-------------|-------|-----|
| 5  | 192 | NCI In Vivo Anticancer Drug Screen. Data for tumor model B16 Melanoma (intraperitoneal) in B6D2F1 (BDF1) mice                                       | DTP/NCI                                                   | 0 | 5 | Anticancer, Melanoma                  | 0.846±0.013 | 0.719±0.02  | 3567  | 211 |
| 6  | 250 | NCI In Vivo Anticancer Drug Screen. Data for tumor model L1210 Leukemia (subcutaneous) in B6D2F1 (BDF1) mice                                        | DTP/NCI                                                   | 0 | 1 | Anticancer, Leukemia                  | 0.723±0.046 | 0.731±0.045 | 199   | 87  |
| 7  | 258 | NCI In Vivo Anticancer Drug Screen. Data for tumor model L1210 Leukemia (subcutaneous) in CD2F1 (CDF1) mice                                         | DTP/NCI                                                   | 0 | 3 | Anticancer, Leukemia                  | 0.737±0.062 | 0.714±0.064 | 113   | 62  |
| 8  | 264 | NCI In Vivo Anticancer Drug Screen. Data for tumor model Human Lung LX-1 Xenograft (intrarenal inoculation) in NU/NU Swiss (nude) mice              | DTP/NCI                                                   | 2 | 0 | Anticancer, Human Lung LX-1 Xenograft | 0.45±0.044  | 0.53±0.042  | 446   | 97  |
| 9  | 270 | NCI In Vivo Anticancer Drug Screen. Data for tumor model Lewis Lung Carcinoma (subcutaneous) in B6D2F1 (BDF1) mice                                  | DTP/NCI                                                   | 0 | 1 | Anticancer, Lung Tumor                | 0.693±0.04  | 0.701±0.039 | 517   | 69  |
| 10 | 292 | NCI In Vivo Anticancer Drug Screen. Data for tumor model Sarcoma M5076 (intraperitoneal) in B6C3F1 mice                                             | DTP/NCI                                                   | 2 | 0 | Anticancer, Sarcoma                   | 0.804±0.03  | 0.688±0.04  | 481   | 69  |
| 11 | 296 | NCI In Vivo Anticancer Drug Screen. Data for tumor model Human Mammary Carcinoma MX-1 Xenograft (intrarenal inoculation) in NU/NU Swiss (nude) mice | DTP/NCI                                                   | 0 | 2 | Anticancer, Human Mammary Carcinoma   | 0.547±0.043 | 0.557±0.043 | 501   | 86  |
| 12 | 328 | NCI In Vivo Anticancer Drug Screen. Data for tumor model P388 Leukemia (intraperitoneal) in B6D2F1 (BDF1) mice                                      | DTP/NCI                                                   | 5 | 0 | Anticancer, Leukemia                  | 0.839±0.008 | 0.722±0.011 | 7905  | 815 |
| 13 | 357 | AP1 Signaling Pathway                                                                                                                               | NCGC                                                      | 0 | 1 | AP1 Signaling Pathway                 | 0.757±0.038 | 0.539±0.056 | 8309  | 44  |
| 14 | 364 | Cell Proliferation & Viability (Cytotoxicity) Assay                                                                                                 | The Scripps Research Institute Molecular Screening Center | 1 | 0 | Cytotoxicity, Jurkat                  | 0.751±0.041 | 0.522±0.059 | 2970  | 40  |
| 15 | 365 | E. coli RNase H Inhibition                                                                                                                          | MTDP                                                      | 1 | 0 | ribonuclease H1, E. coli              | 0.722±0.049 | 0.74±0.047  | 183   | 92  |
| 16 | 366 | human RNase H Inhibition                                                                                                                            | MTDP                                                      | 1 | 0 | ribonuclease H1, Human                | 0.66±0.068  | 0.825±0.056 | 183   | 145 |
| 17 | 367 | HIV-2 RNase H Inhibition                                                                                                                            | MTDP                                                      | 0 | 1 | Virus, HIV-2                          | 0.64±0.064  | 0.63±0.064  | 183   | 137 |
| 18 | 371 | Human A549 Lung Tumor Cell Growth Inhibition Assay                                                                                                  | SRMLSC                                                    | 1 | 0 | Cytotoxicity, A549                    | 0.759±0.017 | 0.682±0.021 | 2972  | 239 |
| 19 | 438 | Cellular assay for TNF alpha induced NFkappaB translocation                                                                                         | Columbia University Molecular Screening Center            | 1 | 0 | Anti-Inflammatory model               | 0.582±0.047 | 0.462±0.051 | 11669 | 56  |
| 20 | 446 | Stat Signaling Pathway                                                                                                                              | NCGC                                                      | 0 | 1 | Stat Signaling Pathway                | 0.752±0.038 | 0.491±0.056 | 8343  | 46  |
| 21 | 450 | GR-GFP Redistribution                                                                                                                               | NCGC                                                      | 0 | 1 | glucocorticoid receptor (GR)          | 0.915±0.011 | 0.929±0.009 | 8883  | 102 |
| 22 | 457 | VCAM-1 Imaging Assay in Pooled HUVECs: Augmentation of TNFa induced VCAM-1 cell surface expression.                                                 | Burnham Center for Chemical Genomics                      | 0 | 1 | Anti-Inflammatory model               | 0.66±0.071  | 0.695±0.067 | 9505  | 20  |
| 23 | 464 | Cell Proliferation & Viability (Cytotoxicity) Dose Response Assay 60K MLSMR                                                                         | The Scripps Research Institute                            | 0 | 1 | Cytotoxicity, Jurkat                  | 0.638±0.027 | 0.673±0.026 | 683   | 317 |

|    |      |                                                                                                                                                                                 |                                                                      |   |   |                                                      |             |             |       |      |
|----|------|---------------------------------------------------------------------------------------------------------------------------------------------------------------------------------|----------------------------------------------------------------------|---|---|------------------------------------------------------|-------------|-------------|-------|------|
|    |      |                                                                                                                                                                                 | Molecular Screening Center                                           |   |   |                                                      |             |             |       |      |
| 24 | 483  | Aggregation and Clearance of Mutant Huntingtin Protein                                                                                                                          | Columbia University Molecular Screening Center                       | 0 | 1 | Huntington disease protein                           | 0.526±0.041 | 0.454±0.042 | 9489  | 83   |
| 25 | 575  | Human Endothelial Cell Proliferation Assay                                                                                                                                      | SRMLSC                                                               | 0 | 1 | Angiogenesis model                                   | 0.731±0.026 | 0.617±0.032 | 9346  | 106  |
| 26 | 599  | Counterscreen for inhibitors of the nuclear receptor Steroidogenic Factor 1 (SF-1): A cell-based dose-response assay for inhibition of the RAR-related orphan receptor A (RORA) | The Scripps Research Institute Molecular Screening Center            | 1 | 0 | Nuclear receptor ROR-alpha (counterscreen)           | 0.634±0.04  | 0.673±0.039 | 343   | 207  |
| 27 | 600  | Dose-response cell-based assay for inhibitors of the nuclear receptor Steroidogenic Factor 1 (SF-1)                                                                             | The Scripps Research Institute Molecular Screening Center            | 1 | 0 | steroidogenic factor 1                               | 0.62±0.04   | 0.592±0.04  | 345   | 203  |
| 28 | 608  | NMR Based Screening Assay for FKBP12                                                                                                                                            | Burnham Center for Chemical Genomics                                 | 0 | 4 | peptidyl-prolyl cis-trans isomerase FKBP1A           | 0.867±0.024 | 0.628±0.051 | 3701  | 42   |
| 29 | 624  | Measurement of GPCR-mediated thallium flux through GIRK channels: Primary Screen                                                                                                | Vanderbilt Screening Center for GPCRs, Ion Channels and Transporters | 0 | 1 | potassium voltage-gated channel subfamily J member 3 | 0.605±0.051 | 0.516±0.056 | 8078  | 44   |
| 30 | 636  | Modulators of Post-Golgi Transport - 384-well pilot screen                                                                                                                      | SRMLSC                                                               | 0 | 1 | Post-Golgi Transport                                 | 0.714±0.052 | 0.447±0.072 | 9416  | 29   |
| 31 | 642  | Allosteric Modulators of D1 Receptors: Confirmation Screen                                                                                                                      | Vanderbilt Screening Center for GPCRs, Ion Channels and Transporters | 1 | 0 | dopamine D1 receptor                                 | 0.744±0.024 | 0.854±0.02  | 2186  | 1929 |
| 32 | 647  | Allosteric Modulators of D1 Receptors: Secondary Assay 2                                                                                                                        | Vanderbilt Screening Center for GPCRs, Ion Channels and Transporters | 1 | 0 | dopamine D1 receptor                                 | 0.649±0.016 | 0.715±0.015 | 2186  | 1389 |
| 33 | 771  | Cell Growth High Content Screening Assay of Human HT29 Colon Tumor Cells (48 Hour Treatment Protocol)                                                                           | SRMLSC                                                               | 0 | 1 | Anticancer, Colon Tumor                              | 0.846±0.028 | 0.647±0.05  | 2972  | 41   |
| 34 | 884  | qHTS Assay for Inhibitors and Substrates of Cytochrome P450 3A4                                                                                                                 | NCGC                                                                 | 1 | 0 | ADMET, Cytochrome P450 3A4                           | 0.921±0.004 | 0.87±0.005  | 8994  | 3112 |
| 35 | 885  | qHTS Assay for Activators of Cytochrome P450 3A4                                                                                                                                | NCGC                                                                 | 0 | 1 | ADMET, Cytochrome P450 3A4                           | 0.907±0.009 | 0.823±0.016 | 11159 | 150  |
| 36 | 1013 | Confirmatory Screen for chemical inhibitors of TNF alpha stimulated VCAM1 expression                                                                                            | Columbia University Molecular Screening Center                       | 1 | 0 | Anti-Inflammatory model                              | 0.764±0.037 | 0.566±0.051 | 477   | 57   |
| 37 | 1249 | Confirmatory Screen for chemical modifiers of cytoskeleton assembly                                                                                                             | Columbia University                                                  | 0 | 1 | Anti-Inflammatory model                              | 0.76±0.059  | 0.413±0.092 | 672   | 19   |

|    |        |                                                                                                                                                                                                       |                                                               |   |   |                                           |             |             |      |      |
|----|--------|-------------------------------------------------------------------------------------------------------------------------------------------------------------------------------------------------------|---------------------------------------------------------------|---|---|-------------------------------------------|-------------|-------------|------|------|
|    |        |                                                                                                                                                                                                       | Molecular Screening Center                                    |   |   |                                           |             |             |      |      |
| 38 | 1267   | Confirmation cell-based high throughput screening assay to measure STAT3 activation                                                                                                                   | The Scripps Research Institute Molecular Screening Center     | 0 | 1 | Anti-Inflammatory model                   | 0.572±0.023 | 0.591±0.023 | 1168 | 746  |
| 39 | 1309   | Counterscreen assay for STAT3 activators: Cell-based high throughput assay to measure NF-kappaB activation                                                                                            | The Scripps Research Institute Molecular Screening Center     | 1 | 0 | Anti-Inflammatory model                   | 0.731±0.026 | 0.639±0.031 | 1168 | 127  |
| 40 | 1318   | Counterscreen assay for STAT3 activators: Cell-based high throughput assay to measure STAT1 activation                                                                                                | The Scripps Research Institute Molecular Screening Center     | 0 | 1 | Anti-Inflammatory model (counterscreen)   | 0.715±0.026 | 0.688±0.027 | 1168 | 150  |
| 41 | 1332   | High Throughput Screen to Identify Inhibitors of Mycobacterium tuberculosis H37Rv                                                                                                                     | Southern Research Institute                                   | 0 | 2 | Mycobacterium tuberculosis                | 0.873±0.016 | 0.773±0.023 | 1034 | 149  |
| 42 | 1650   | A Cell Based Secondary Assay To Explore Cytotoxicity of West Nile Virus Anti-Viral Hit Compounds                                                                                                      | Southern Research Specialized Biocontainment Screening Center | 0 | 1 | Cytotoxicity, Vero Cells                  | 0.688±0.03  | 0.69±0.03   | 546  | 173  |
| 43 | 1834   | Luminescence-based confirmation cell-based high throughput screening assay to identify inhibitors of kruppel-like factor 5 (KLF5)                                                                     | The Scripps Research Institute Molecular Screening Center     | 1 | 0 | Anticancer, colon                         | 0.583±0.039 | 0.736±0.036 | 556  | 437  |
| 44 | 1905   | Luminescence-based counterscreen assay for KLF5 inhibitors: cell-based high throughput screening assay to identify cytotoxic compounds using the IEC-6 intestinal epithelial cell line in triplicate. | The Scripps Research Institute Molecular Screening Center     | 1 | 0 | Cytotoxicity, IEC-6 intestinal epithelial | 0.826±0.023 | 0.799±0.025 | 556  | 297  |
| 45 | 1907   | Luminescence-based confirmation cell-based assay for cytotoxic compounds using the IEC-6 intestinal epithelial cell line.                                                                             | The Scripps Research Institute Molecular Screening Center     | 1 | 0 | Cytotoxicity, IEC-6 intestinal epithelial | 0.674±0.018 | 0.696±0.017 | 1744 | 1096 |
| 46 | 1990   | Luminescence Cell-Based Dose Response HTS to Identify Inhibitors of Luciferase Translation or Activity in H4 Neuroglioblastoma Cells                                                                  | Broad Institute                                               | 1 | 0 | Counterscreen, Luciferase                 | 0.586±0.019 | 0.559±0.019 | 1776 | 1131 |
| 47 | 2010   | Luminescence Cell-Based Dose Response HTS Screen to Identify Cytotoxic Compounds of NIH3T3 cells.                                                                                                     | Broad Institute                                               | 0 | 1 | Cytotoxicity, NIH3T3                      | 0.662±0.013 | 0.638±0.013 | 3177 | 881  |
| 48 | 2327   | Fluorescence Cell-Based Secondary Assay for toxicity in mammalian fibroblasts                                                                                                                         | Broad Institute                                               | 1 | 0 | Cytotoxicity, NIH3T3                      | 0.607±0.022 | 0.56±0.023  | 1216 | 382  |
| 49 | 2423   | Fluorescence Cell-Based Secondary Assay to Identify Inhibitors of Resistant C. albicans Growth in the Presence of Fluconazole                                                                         | Broad Institute                                               | 1 | 0 | Fungus, Candida albicans                  | 0.679±0.024 | 0.697±0.023 | 1330 | 1010 |
| 50 | 2467   | Fluorescence Cell-Based Retest of C. albicans Growth in the Presence of Fluconazole                                                                                                                   | Broad Institute                                               | 1 | 0 | Fungus, Candida albicans                  | 0.66±0.019  | 0.608±0.019 | 1529 | 963  |
| 51 | 434954 | Luminescence Cell-Free Homogeneous Dose Retest to Identify Inhibitors of Glycogen Synthase Kinase-3 beta Activity                                                                                     | Broad Institute                                               | 1 | 0 | glycogen synthase kinase-3 alpha          | 0.806±0.013 | 0.711±0.015 | 2089 | 564  |

|    |        |                                                                                                                                                                                                                      |                                                             |   |   |                                                    |             |             |      |      |
|----|--------|----------------------------------------------------------------------------------------------------------------------------------------------------------------------------------------------------------------------|-------------------------------------------------------------|---|---|----------------------------------------------------|-------------|-------------|------|------|
| 52 | 435020 | Single concentration confirmation of chemical inhibitors of T-cell specific antigen receptor-induced NF-kB activation                                                                                                | Burnham Center for Chemical Genomics                        | 1 | 0 | Anti-Inflammatory model                            | 0.731±0.014 | 0.653±0.016 | 2511 | 601  |
| 53 | 449703 | NOVARTIS: Inhibition of Plasmodium falciparum 3D7 (drug-susceptible) proliferation in erythrocyte-based infection assay                                                                                              | ChEMBL                                                      | 1 | 0 | Plasmodium falciparum                              | 0.727±0.011 | 0.729±0.011 | 5046 | 3709 |
| 54 | 449704 | NOVARTIS: Inhibition of Plasmodium falciparum W2 (drug-resistant) proliferation in erythrocyte-based infection assay                                                                                                 | ChEMBL                                                      | 1 | 0 | Plasmodium falciparum                              | 0.668±0.013 | 0.661±0.014 | 5035 | 4095 |
| 55 | 463189 | 96-well format Chlamydomonas reinhardtii Algae Gravitaxis Assay to measure the difference in the absorbance between the small compact plug of WT swimming algae versus the MUT algae lacking cilia.                  | University of Pittsburgh Molecular Library Screening Center | 0 | 1 | Chlamydomonas reinhardtii Algae Gravitaxis         | 0.667±0.027 | 0.647±0.028 | 3489 | 143  |
| 56 | 489033 | Dose Response selectivity of uHTS chemical inhibitors of T-cell specific antigen receptor-induced NF-kB activation in a 697B cell line using a luminescence assay                                                    | Burnham Center for Chemical Genomics                        | 0 | 1 | Anti-Inflammatory model                            | 0.794±0.023 | 0.715±0.027 | 603  | 203  |
| 57 | 489035 | Dose response confirmation of uHTS chemical inhibitors of T-cell specific antigen receptor-induced NF-kB activation in a Jurkat cell line using a luminescence assay                                                 | Burnham Center for Chemical Genomics                        | 0 | 1 | Anti-Inflammatory model                            | 0.703±0.027 | 0.647±0.029 | 603  | 250  |
| 58 | 489041 | Dose response counterscreen of uHTS chemical inhibitors of T-cell specific antigen receptor-induced NF-kB activation in a HEK-293T cell line using a luminescence assay                                              | Burnham Center for Chemical Genomics                        | 1 | 0 | NF-kB induction (counterscreen)                    | 0.65±0.035  | 0.761±0.031 | 603  | 449  |
| 59 | 493027 | Luminescence-based biochemical high throughput validation assay to identify inhibitors of the interaction of the lipase co-activator protein, abhydrolase domain containing 5 (ABHD5) with perilipin-1 (PLIN1)       | The Scripps Research Institute Molecular Screening Center   | 0 | 1 | 1-acylglycerol-3-phosphate O-acyltransferase ABHD5 | 0.7±0.047   | 0.568±0.057 | 1629 | 40   |
| 60 | 493035 | Luminescence-based biochemical high throughput validation assay to identify inhibitors of the interaction of the lipase co-activator protein, abhydrolase domain containing 5 (ABHD5) with perilipin-5 (MLDP; PLIN5) | The Scripps Research Institute Molecular Screening Center   | 0 | 1 | 1-acylglycerol-3-phosphate O-acyltransferase ABHD5 | 0.673±0.049 | 0.562±0.058 | 1629 | 40   |
| 61 | 493083 | HSF-1 induced GFP reporter and Doxycycline induced RFP reporter Measured in Cell-Based System Using Plate Reader - 2038-03_Inhibitor_DoseNoFile_CherryPick_Activity_Set3                                             | Broad Institute                                             | 0 | 1 | Hsf1 protein                                       | 0.551±0.038 | 0.602±0.037 | 2265 | 91   |
| 62 | 504459 | HTS for Beta-2AR agonists via FAP method from Validation Set                                                                                                                                                         | NMMLSC                                                      | 0 | 1 | beta-2 adrenergic receptor                         | 0.552±0.072 | 0.552±0.073 | 1374 | 26   |
| 63 | 504592 | Inhibitors of Prion Protein 5' UTR mRNA Measured in Cell-Based System Using Plate Reader - 2078-01_Inhibitor_SinglePoint_CherryPick_Activity                                                                         | Broad Institute                                             | 1 | 0 | Prion Protein 5' UTR mRNA                          | 0.773±0.02  | 0.732±0.021 | 924  | 448  |
| 64 | 504848 | Confirmation screen for delayed death inhibitors of the malarial parasite plastid, 96 hour incubation                                                                                                                | NCGC                                                        | 1 | 0 | Plasmodium falciparum                              | 0.73±0.025  | 0.761±0.025 | 1492 | 1253 |
| 65 | 504850 | Confirmation screen for delayed death inhibitors of the malarial parasite plastid, 48 hour incubation                                                                                                                | NCGC                                                        | 1 | 0 | Plasmodium falciparum                              | 0.768±0.021 | 0.773±0.021 | 1386 | 1052 |
| 66 | 504861 | Viability counterscreen of potential LMP-1 inhibitors in HEK293 cell background Measured in Cell-Based System Using Plate Reader - 2122-02_Inhibitor_Dose_CherryPick_Activity                                        | Broad Institute                                             | 1 | 0 | Cytotoxicity, HEK293                               | 0.75±0.02   | 0.66±0.023  | 1113 | 257  |

|    |        |                                                                                                                                                                                                            |                                                           |   |   |                                                        |             |             |      |      |
|----|--------|------------------------------------------------------------------------------------------------------------------------------------------------------------------------------------------------------------|-----------------------------------------------------------|---|---|--------------------------------------------------------|-------------|-------------|------|------|
| 67 | 504865 | Inhibitors of USP1/UAF1: Pilot qHTS                                                                                                                                                                        | NCGC                                                      | 0 | 1 | USP1 protein                                           | 0.86±0.011  | 0.687±0.02  | 5332 | 247  |
| 68 | 504882 | Lymphoblastoid Cells (LCL) Cytotoxicity Secondary Assay Measured in Cell-Based System Using Plate Reader - 2122-03_Inhibitor_Dose_CherryPick_Activity_Set2                                                 | Broad Institute                                           | 1 | 0 | Virus, Epstein-Barr                                    | 0.771±0.019 | 0.687±0.022 | 1039 | 268  |
| 69 | 521220 | Inhibition of neurosphere proliferation of mouse neural precursor cells by MTT assay                                                                                                                       | ChEMBL                                                    | 1 | 1 | Citotoxicidade, mouse neural precursor cells           | 0.624±0.043 | 0.515±0.048 | 644  | 67   |
| 70 | 537733 | Binding affinity to Candida albicans CaCdr1p expressed in yeast AD1-8u                                                                                                                                     | ChEMBL                                                    | 1 | 0 | Fungus, Candida albicans                               | 0.535±0.102 | 0.776±0.084 | 56   | 31   |
| 71 | 588343 | Inhibitors of Epstein-Barr LMP1 inducible NF-kappaB luciferase reporter Measured in Cell-Based System Using Plate Reader - 2122-01_Inhibitor_Dose_CherryPick_Activity                                      | Broad Institute                                           | 1 | 0 | Virus, Epstein-Barr                                    | 0.768±0.019 | 0.721±0.02  | 1084 | 604  |
| 72 | 588350 | Counterscreen for activators of the GAA850 frataxin promoter: luminescence-based cell-based high throughput screening assay to identify activators of the GAA30 frataxin promoter                          | The Scripps Research Institute Molecular Screening Center | 0 | 1 | GAA30 promoter (counterscreen)                         | 0.769±0.017 | 0.755±0.017 | 1742 | 1157 |
| 73 | 588398 | TES1 - eGFP vs TES2 -dsRED Pathway Differentiation Measured in Cell-Based System Using Imaging - 2122-04_Inhibitor_Dose_CherryPick_Activity                                                                | Broad Institute                                           | 1 | 0 | Virus, Epstein-Barr                                    | 0.621±0.036 | 0.537±0.039 | 1054 | 99   |
| 74 | 588506 | Phenotypic HTS multiplex for antifungal efflux pump inhibitors with Validation compound Set                                                                                                                | NMMLSC                                                    | 0 | 1 | Fungus, Candida albicans                               | 0.46±0.04   | 0.5±0.038   | 1638 | 100  |
| 75 | 588792 | Luminescence-based cell-based high throughput confirmation assay for inhibitors of the Steroid Receptor Coactivator 3 (SRC3; NCOA3)                                                                        | The Scripps Research Institute Molecular Screening Center | 1 | 0 | Steroid Receptor Coactivator 3                         | 0.728±0.015 | 0.673±0.016 | 1923 | 687  |
| 76 | 588794 | Counterscreen for inhibitors of the Steroid Receptor Coactivator 3 (SRC3; NCOA3): Luminescence-based cell-based high throughput assay to identify inhibitors of the Herpes Virus Virion Protein 16 (VP16)  | The Scripps Research Institute Molecular Screening Center | 0 | 1 | Herpes simplex virus Virion Protein 16 (counterscreen) | 0.667±0.016 | 0.616±0.017 | 1923 | 926  |
| 77 | 588820 | Luminescence-based cell-based high throughput confirmation assay for inhibitors of the Steroid Receptor Coactivator 1 (SRC1; NCOA1).                                                                       | The Scripps Research Institute Molecular Screening Center | 1 | 0 | Steroid Receptor Coactivator 1                         | 0.727±0.017 | 0.709±0.017 | 1996 | 373  |
| 78 | 588824 | Counterscreen for inhibitors of the Steroid Receptor Coactivator 1 (SRC1; NCOA1): Luminescence-based cell-based high throughput assay to identify inhibitors of the Herpes Virus Virion Protein 16 (VP16). | The Scripps Research Institute Molecular Screening Center | 0 | 1 | Herpes simplex virus Virion Protein 16 (counterscreen) | 0.678±0.016 | 0.632±0.016 | 1996 | 878  |
| 79 | 602156 | Novartis GNF Liver Stage Dataset: Malariabox Annotation                                                                                                                                                    | GNF / Scripps Winzeler lab                                | 0 | 1 | Plasmodium falciparum                                  | 0.749±0.016 | 0.65±0.02   | 5543 | 267  |
| 80 | 602166 | Luminescence-based cell-based high throughput dose response assay for inhibitors of the Steroid Receptor Coactivator 3 (SRC3; NCOA3)                                                                       | The Scripps Research Institute Molecular Screening Center | 1 | 0 | Steroid Receptor Coactivator 3                         | 0.636±0.048 | 0.652±0.048 | 218  | 111  |
| 81 | 602168 | Counterscreen for inhibitors of the Steroid Receptor Coactivator 3 (SRC3; NCOA3): Luminescence-based cell-based high throughput dose response assay to identify                                            | The Scripps Research Institute                            | 0 | 1 | Steroid Receptor Coactivator 1 (counterscreen)         | 0.55±0.064  | 0.6±0.061   | 218  | 41   |

|    |        |                                                                                                                                                                                                                                |                                                             |   |   |                                                        |             |             |      |      |
|----|--------|--------------------------------------------------------------------------------------------------------------------------------------------------------------------------------------------------------------------------------|-------------------------------------------------------------|---|---|--------------------------------------------------------|-------------|-------------|------|------|
|    |        | inhibitors of the Steroid Receptor Coactivator 1 (SRC1; NCOA1)                                                                                                                                                                 | Molecular Screening Center                                  |   |   |                                                        |             |             |      |      |
| 82 | 602234 | Counterscreen for inhibitors of the Steroid Receptor Coactivator 1 (SRC1; NCOA1): Luminescence-based cell-based high throughput dose response assay to identify inhibitors of the Steroid Receptor Coactivator 3 (SRC3; NCOA3) | The Scripps Research Institute Molecular Screening Center   | 1 | 0 | Steroid Receptor Coactivator 3 (counterscreen)         | 0.568±0.058 | 0.477±0.057 | 222  | 164  |
| 83 | 602235 | Luminescence-based cell-based high throughput dose response assay for inhibitors of the Steroid Receptor Coactivator 1 (SRC1; NCOA1)                                                                                           | The Scripps Research Institute Molecular Screening Center   | 1 | 0 | Steroid Receptor Coactivator 1                         | 0.659±0.052 | 0.638±0.053 | 222  | 53   |
| 84 | 602277 | Novel Modifiers of Toll-like and RIG-like Receptor Signaling-Poly IC Stimulus                                                                                                                                                  | University of Pittsburgh Molecular Library Screening Center | 1 | 0 | Anti-Inflammatory model                                | 0.608±0.022 | 0.516±0.024 | 9512 | 239  |
| 85 | 624002 | qHTS for Inhibitors of mutant isocitrate dehydrogenase 1 (IDH1): Confirmation of Cherrypicks                                                                                                                                   | NCGC                                                        | 1 | 0 | Anticancer, glioblastoma                               | 0.706±0.063 | 0.893±0.045 | 634  | 596  |
| 86 | 624030 | Biochemical firefly luciferase enzyme assay for NPC                                                                                                                                                                            | NCGC                                                        | 0 | 1 | Counterscreen, Luciferase                              | 0.859±0.019 | 0.765±0.028 | 2688 | 83   |
| 87 | 624031 | S16 Schwann cell viability assay (CellTiter-Glo assay)                                                                                                                                                                         | NCGC                                                        | 0 | 1 | Cytotoxicity, S16                                      | 0.8±0.028   | 0.715±0.036 | 1901 | 65   |
| 88 | 624032 | S16 Schwann cell PMP22 intronic element firefly luciferase assay                                                                                                                                                               | NCGC                                                        | 1 | 0 | peripheral myelin protein 22                           | 0.686±0.023 | 0.687±0.022 | 1830 | 208  |
| 89 | 624044 | S16 Schwann cell PMP22 intronic element beta-lactamase assay                                                                                                                                                                   | NCGC                                                        | 1 | 0 | peripheral myelin protein 22                           | 0.687±0.035 | 0.495±0.044 | 1899 | 76   |
| 90 | 624378 | Luminescence-based cell-based high throughput confirmation assay for agonists of nuclear receptor subfamily 2, group E, member 3 (NR2E3)                                                                                       | The Scripps Research Institute Molecular Screening Center   | 1 | 0 | photoreceptor-specific nuclear receptor                | 0.674±0.015 | 0.628±0.015 | 2153 | 1058 |
| 91 | 624379 | Counterscreen for agonists of nuclear receptor subfamily 2, group E, member 3 (NR2E3): Luminescence-based cell-based high throughput screening assay to identify agonists of the Herpes Virus Virion Protein 16 (VP16)         | The Scripps Research Institute Molecular Screening Center   | 0 | 1 | Herpes simplex virus Virion Protein 16 (counterscreen) | 0.681±0.016 | 0.605±0.017 | 2153 | 595  |
| 92 | 624394 | Luminescence-based cell-based high throughput dose response assay for agonists of nuclear receptor subfamily 2, group E, member 3 (NR2E3)                                                                                      | The Scripps Research Institute Molecular Screening Center   | 1 | 0 | photoreceptor-specific nuclear receptor                | 0.453±0.085 | 0.786±0.08  | 207  | 186  |
| 93 | 624395 | Counterscreen for agonists of nuclear receptor subfamily 2, group E, member 3 (NR2E3):Luminescence-based cell-based high throughput dose response assay to identify inhibitors of the Herpes Virus Virion Protein 16 (VP16)    | The Scripps Research Institute Molecular Screening Center   | 1 | 0 | Herpes simplex virus Virion Protein 16 (counterscreen) | 0.592±0.055 | 0.625±0.054 | 207  | 136  |
| 94 | 624476 | Cytotoxicity counterscreen for NFkB agonists and antagonists                                                                                                                                                                   | NCGC                                                        | 0 | 1 | Cytotoxicity                                           | 0.655±0.04  | 0.657±0.04  | 324  | 102  |
| 95 | 624479 | qHTS Assay for Identification of Small Molecule Antagonists for NFkB Signaling Pathway.                                                                                                                                        | NCGC                                                        | 0 | 1 | Antagonist, NFkB Signaling Pathway                     | 0.685±0.037 | 0.695±0.037 | 334  | 153  |
| 96 | 651558 | qHTS Assay to Find Inhibitors of Chronic Active B-Cell Receptor Signaling: Hit Validation in Primary Screen                                                                                                                    | NCGC                                                        | 1 | 0 | Anticancer, non-Hodgkin lymphoma                       | 0.794±0.021 | 0.784±0.021 | 837  | 460  |

|     |            |                                                                                                                                                                                                                                                                          |                                                           |   |   |                                                                        |             |             |      |      |
|-----|------------|--------------------------------------------------------------------------------------------------------------------------------------------------------------------------------------------------------------------------------------------------------------------------|-----------------------------------------------------------|---|---|------------------------------------------------------------------------|-------------|-------------|------|------|
| 97  | 65156<br>8 | qHTS Assay to Find Inhibitors of Chronic Active B-Cell Receptor Signaling: Hit Validation in Renilla Reporter Assay                                                                                                                                                      | NCGC                                                      | 0 | 1 | Anticancer, non-Hodgkin lymphoma                                       | 0.791±0.033 | 0.635±0.048 | 1001 | 50   |
| 98  | 65161<br>1 | Counterscreen for inverse agonists of the liver receptor homolog-1 (LRH-1; NR5A2): Luminescence-based cell-based high throughput assay to identify nonselective inhibitors of the Steroidogenic acute regulatory protein (StAR) promoter or luminescence assay artifacts | The Scripps Research Institute Molecular Screening Center | 1 | 0 | Steroidogenic acute regulatory protein (StAR) promoter (counterscreen) | 0.786±0.013 | 0.713±0.015 | 1998 | 758  |
| 99  | 65161<br>3 | Luminescence-based cell-based high throughput confirmation assay for inverse agonists of the liver receptor homolog-1 (LRH-1; NR5A2)                                                                                                                                     | The Scripps Research Institute Molecular Screening Center | 1 | 0 | nuclear receptor subfamily 5 group A member 2                          | 0.608±0.022 | 0.629±0.022 | 1998 | 1623 |
| 100 | 65161<br>5 | Counterscreen for inverse agonists of the liver receptor homolog-1 (LRH-1; NR5A2): Luminescence-based cell-based high throughput assay to identify inhibitors of the Herpes Virus Virion Protein 16 (VP16)                                                               | The Scripps Research Institute Molecular Screening Center | 0 | 1 | Herpes simplex virus Virion Protein 16 (counterscreen)                 | 0.805±0.012 | 0.727±0.015 | 1998 | 699  |
| 101 | 65162<br>9 | Single concentration confirmation of small molecule Triacylglycerol inhibitors in a fluorescence assay                                                                                                                                                                   | Burnham Center for Chemical Genomics                      | 1 | 0 | Triacylglycerol inhibitors                                             | 0.618±0.027 | 0.613±0.027 | 876  | 611  |
| 102 | 65163<br>0 | Dose Response confirmation of small molecule Triacylglycerol inhibitors in a panel assay                                                                                                                                                                                 | Burnham Center for Chemical Genomics                      | 0 | 1 | Triacylglycerol inhibitors                                             | 0.636±0.03  | 0.582±0.031 | 611  | 193  |
| 103 | 65163<br>1 | qHTS assay for small molecule agonists of the p53 signaling pathway                                                                                                                                                                                                      | Tox21                                                     | 1 | 1 | Agonist, p53                                                           | 0.779±0.014 | 0.642±0.019 | 4451 | 335  |
| 104 | 65163<br>2 | qHTS assay for small molecules that induce genotoxicity in human embryonic kidney cells expressing luciferase-tagged ATAD5                                                                                                                                               | Tox21                                                     | 2 | 0 | Genotoxicity, ATAD5                                                    | 0.789±0.02  | 0.625±0.029 | 5619 | 131  |
| 105 | 65163<br>3 | qHTS assay for small molecule agonists of the p53 signaling pathway - cell viability                                                                                                                                                                                     | Tox21                                                     | 0 | 2 | Cytotoxicity, Agonist, p53                                             | 0.802±0.012 | 0.679±0.017 | 5510 | 335  |
| 106 | 65163<br>4 | qHTS assay for small molecules that induce genotoxicity in human embryonic kidney cells expressing luciferase-tagged ATAD5 - cell viability                                                                                                                              | Tox21                                                     | 1 | 1 | Genotoxicity, ATAD5                                                    | 0.784±0.015 | 0.637±0.021 | 5500 | 254  |
| 107 | 65171<br>2 | Cell Proliferation Assay against the TMD8 Cell Line (Caspase readout at 16 hrs)                                                                                                                                                                                          | NCGC                                                      | 1 | 0 | Cytotoxicity, TMD8                                                     | 0.644±0.047 | 0.659±0.046 | 249  | 77   |
| 108 | 65213<br>4 | Luminescence-based cell-based primary high throughput confirmation assay for inhibitors of the orphan nuclear receptor subfamily 0, group B, member 1 (DAX1; NR0B1): repression of SF-1 (NR5A1) activated StAR promoter by full-length DAX-1                             | The Scripps Research Institute Molecular Screening Center | 2 | 0 | nuclear receptor subfamily 0 group B member 1                          | 0.766±0.021 | 0.865±0.017 | 2378 | 2063 |
| 109 | 65213<br>6 | Counterscreen for inhibitors of the orphan nuclear receptor subfamily 0, group B, member 1 (DAX1; NR0B1): Luminescence-based cell-based high throughput assay for nonselective inhibitors/assay artifacts using AP2 mutant SF-1 (NR5A1) Transactivation Assay            | The Scripps Research Institute Molecular Screening Center | 0 | 2 | steroidogenic factor 1 (counterscreen)                                 | 0.727±0.018 | 0.821±0.016 | 2378 | 1857 |
| 110 | 68694<br>7 | qHTS for small molecule inhibitors of Yes1 kinase: Primary Screen                                                                                                                                                                                                        | NCGC                                                      | 0 | 1 | Anticancer, Yes1 kinase                                                | 0.83±0.02   | 0.793±0.022 | 682  | 337  |
| 111 | 68701<br>7 | Luminescence-based cell-based high throughput dose response assay for inhibitors of the orphan nuclear                                                                                                                                                                   | The Scripps Research Institute                            | 1 | 1 | nuclear receptor subfamily 0 group B member 1                          | 0.554±0.058 | 0.575±0.057 | 234  | 51   |

|     |        |                                                                                                                                                                                                   |                            |   |   |                                                        |             |             |      |      |
|-----|--------|---------------------------------------------------------------------------------------------------------------------------------------------------------------------------------------------------|----------------------------|---|---|--------------------------------------------------------|-------------|-------------|------|------|
|     |        | receptor subfamily 0, group B, member 1 (DAX1; NR0B1): repression of SF-1 (NR5A1) activated StAR promoter by full-length DAX-1                                                                    | Molecular Screening Center |   |   |                                                        |             |             |      |      |
| 112 | 687029 | PAX8: PAX8-dependent cytotoxicity Measured in Cell-Based System Using Plate Reader - 7054-06_Inhibitor_Dose_CherryPick_Activity                                                                   | Broad Institute            | 0 | 1 | Cytotoxicity, RMG-1 (PAX8)                             | 0.615±0.031 | 0.755±0.024 | 1494 | 131  |
| 113 | 720516 | qHTS assay for small molecules that induce genotoxicity in human embryonic kidney cells expressing luciferase-tagged ATAD5: Summary                                                               | Tox21                      | 2 | 0 | Genotoxicity, ATAD5                                    | 0.805±0.015 | 0.637±0.023 | 5612 | 203  |
| 114 | 720552 | qHTS assay for small molecule agonists of the p53 signaling pathway: Summary                                                                                                                      | Tox21                      | 1 | 1 | Agonist, p53                                           | 0.736±0.014 | 0.621±0.018 | 5393 | 367  |
| 115 | 720634 | qHTS assay for small molecule disruptors of the mitochondrial membrane potential - cell viability                                                                                                 | Tox21                      | 0 | 2 | Cytotoxicity, Mitochondria, membrane potential         | 0.778±0.017 | 0.713±0.02  | 5381 | 207  |
| 116 | 720635 | qHTS assay for small molecule disruptors of the mitochondrial membrane potential                                                                                                                  | Tox21                      | 2 | 0 | Mitochondria, disruptor membrane potential             | 0.877±0.007 | 0.82±0.008  | 3793 | 1059 |
| 117 | 720637 | qHTS assay for small molecule disruptors of the mitochondrial membrane potential: Summary                                                                                                         | Tox21                      | 2 | 0 | Mitochondria, disruptor membrane potential             | 0.869±0.007 | 0.813±0.009 | 4637 | 741  |
| 118 | 720678 | qHTS assay to test for compound auto fluorescence at 460 nm (blue) in HEK293 cells                                                                                                                | Tox21                      | 0 | 2 | Interference, Auto Fluorescence in HEK293              | 0.729±0.058 | 0.49±0.082  | 5775 | 22   |
| 119 | 720681 | qHTS assay to test for compound auto fluorescence at 460 nm (blue) in HEK293 cell free culture                                                                                                    | Tox21                      | 0 | 2 | Interference, Auto Fluorescence in HEK293              | 0.776±0.048 | 0.535±0.075 | 5782 | 25   |
| 120 | 720685 | qHTS assay to test for compound auto fluorescence at 460 nm (blue) in HepG2 cell free culture                                                                                                     | Tox21                      | 0 | 2 | Interference, Auto Fluorescence in HepG2               | 0.768±0.052 | 0.562±0.078 | 5777 | 22   |
| 121 | 720687 | qHTS assay to test for compound auto fluorescence at 460 nm (blue) in HepG2 cells                                                                                                                 | Tox21                      | 0 | 2 | Interference, Auto Fluorescence in HepG2               | 0.706±0.063 | 0.509±0.083 | 5778 | 21   |
| 122 | 720691 | qHTS assay to identify small molecule agonists of the glucocorticoid receptor (GR) signaling pathway                                                                                              | Tox21                      | 0 | 2 | Agonist, glucocorticoid receptor (GR)                  | 0.85±0.016  | 0.73±0.025  | 5349 | 119  |
| 123 | 720693 | qHTS assay to identify small molecule antagonists of the glucocorticoid receptor (GR) signaling pathway - cell viability counter screen                                                           | Tox21                      | 0 | 2 | Cytotoxicity, Antagonist, glucocorticoid receptor (GR) | 0.759±0.019 | 0.59±0.026  | 5384 | 182  |
| 124 | 720719 | qHTS assay to identify small molecule agonists of the glucocorticoid receptor (GR) signaling pathway: Summary                                                                                     | Tox21                      | 0 | 2 | Agonist, glucocorticoid receptor (GR)                  | 0.849±0.016 | 0.734±0.025 | 5349 | 119  |
| 125 | 743012 | qHTS assay for identifying genotoxic compounds that show differential cytotoxicity against isogenic chicken DT40 cell lines with known DNA damage response pathways - wild type cell line         | Tox21                      | 2 | 0 | Cytotoxicity, isogenic chicken DT40 cell line          | 0.833±0.007 | 0.729±0.01  | 4956 | 1211 |
| 126 | 743014 | qHTS assay for identifying genotoxic compounds that show differential cytotoxicity against isogenic chicken DT40 cell lines with known DNA damage response pathways - Rev3 mutant cell line       | Tox21                      | 2 | 0 | Cytotoxicity, isogenic chicken DT40 cell line          | 0.802±0.008 | 0.716±0.01  | 4842 | 1278 |
| 127 | 743015 | qHTS assay for identifying genotoxic compounds that show differential cytotoxicity against isogenic chicken DT40 cell lines with known DNA damage response pathways - Rad54/Ku70 mutant cell line | Tox21                      | 2 | 0 | Cytotoxicity, isogenic chicken DT40 cell line          | 0.832±0.008 | 0.725±0.01  | 5044 | 1295 |

|     |        |                                                                                                                                                                       |                 |   |   |                                                              |             |             |      |     |
|-----|--------|-----------------------------------------------------------------------------------------------------------------------------------------------------------------------|-----------------|---|---|--------------------------------------------------------------|-------------|-------------|------|-----|
| 128 | 743021 | PAX8: non-specific cytotoxicity Measured in Cell-Based System Using Plate Reader - 7054-05_Inhibitor_Dose_DryPowder_Activity                                          | Broad Institute | 0 | 1 | Cytotoxicity, RMG-1 (PAX8)                                   | 0.693±0.02  | 0.739±0.018 | 1546 | 295 |
| 129 | 743033 | qHTS assay to identify small molecule antagonists of the androgen receptor (AR) signaling pathway - cell viability counter screen                                     | Tox21           | 0 | 1 | Cytotoxicity, Antagonist, androgen receptor (AR)             | 0.734±0.018 | 0.636±0.022 | 5259 | 228 |
| 130 | 743035 | qHTS assay to identify small molecule antagonists of the androgen receptor (AR) signaling pathway                                                                     | Tox21           | 2 | 0 | Antagonist, androgen receptor (AR)                           | 0.803±0.012 | 0.715±0.015 | 4304 | 402 |
| 131 | 743040 | qHTS assay to identify small molecule agonists of the androgen receptor (AR) signaling pathway using the MDA cell line                                                | Tox21           | 0 | 2 | Agonist, androgen receptor (AR)                              | 0.838±0.013 | 0.745±0.018 | 5663 | 228 |
| 132 | 743041 | qHTS assay to identify small molecule antagonists of the androgen receptor (AR) signaling pathway using the MDA cell line - cell viability counter screen             | Tox21           | 0 | 1 | Cytotoxicity, Antagonist, androgen receptor (AR)             | 0.754±0.02  | 0.61±0.027  | 5379 | 165 |
| 133 | 743042 | qHTS assay to identify small molecule antagonists of the androgen receptor (AR) signaling pathway using the MDA cell line                                             | Tox21           | 0 | 2 | Antagonist, androgen receptor (AR)                           | 0.748±0.015 | 0.67±0.017  | 5383 | 342 |
| 134 | 743063 | qHTS assay to identify small molecule antagonists of the androgen receptor (AR) signaling pathway: Summary                                                            | Tox21           | 2 | 0 | Antagonist, androgen receptor (AR)                           | 0.857±0.01  | 0.712±0.016 | 4826 | 365 |
| 135 | 743064 | qHTS assay to identify small molecule antagonists of the thyroid receptor (TR) signaling pathway - cell viability counter screen                                      | Tox21           | 2 | 0 | Cytotoxicity, Antagonist, thyroid receptor (TR)              | 0.816±0.009 | 0.714±0.012 | 4932 | 668 |
| 136 | 743065 | qHTS assay to identify small molecule antagonists of the thyroid receptor (TR) signaling pathway                                                                      | Tox21           | 2 | 0 | Antagonist, thyroid receptor (TR)                            | 0.83±0.008  | 0.707±0.011 | 5278 | 935 |
| 137 | 743066 | qHTS assay to identify small molecule agonists of the thyroid receptor (TR) signaling pathway                                                                         | Tox21           | 0 | 1 | Agonist, thyroid receptor (TR)                               | 0.707±0.052 | 0.568±0.065 | 5422 | 30  |
| 138 | 743067 | qHTS assay to identify small molecule antagonists of the thyroid receptor (TR) signaling pathway: Summary                                                             | Tox21           | 1 | 0 | Antagonist, thyroid receptor (TR)                            | 0.774±0.016 | 0.594±0.023 | 4385 | 248 |
| 139 | 743069 | qHTS assay to identify small molecule antagonists of the estrogen receptor alpha (ER-alpha) signaling pathway                                                         | Tox21           | 0 | 2 | Antagonist, estrogen receptor alpha (ER-alpha)               | 0.757±0.017 | 0.648±0.022 | 4819 | 229 |
| 140 | 743074 | qHTS assay to identify small molecule antagonists of the estrogen receptor alpha (ER-alpha) signaling pathway - cell viability counter screen                         | Tox21           | 0 | 1 | Cytotoxicity, Antagonist, estrogen receptor alpha (ER-alpha) | 0.767±0.022 | 0.568±0.033 | 5118 | 123 |
| 141 | 743078 | qHTS assay to identify small molecule antagonists of the estrogen receptor alpha (ER-alpha) signaling pathway: Summary                                                | Tox21           | 0 | 2 | Antagonist, estrogen receptor alpha (ER-alpha)               | 0.767±0.017 | 0.658±0.021 | 4819 | 229 |
| 142 | 743079 | qHTS assay to identify small molecule agonists of the estrogen receptor alpha (ER-alpha) signaling pathway using the BG1 cell line                                    | Tox21           | 0 | 2 | Agonist, estrogen receptor alpha (ER-alpha)                  | 0.781±0.011 | 0.727±0.013 | 4835 | 567 |
| 143 | 743080 | qHTS assay to identify small molecule antagonists of the estrogen receptor alpha (ER-alpha) signaling pathway using the BG1 cell line                                 | Tox21           | 1 | 0 | Antagonist, estrogen receptor alpha (ER-alpha)               | 0.78±0.016  | 0.651±0.022 | 4945 | 232 |
| 144 | 743081 | qHTS assay to identify small molecule antagonists of the estrogen receptor alpha (ER-alpha) signaling pathway using the BG1 cell line - cell viability counter screen | Tox21           | 0 | 1 | Cytotoxicity, Antagonist, estrogen receptor alpha (ER-alpha) | 0.869±0.015 | 0.556±0.035 | 5320 | 110 |
| 145 | 743083 | qHTS assay to identify aromatase inhibitors                                                                                                                           | Tox21           | 0 | 2 | Inhibitors, Aromatase                                        | 0.78±0.012  | 0.709±0.015 | 5407 | 405 |

|     |            |                                                                                                                                                                     |       |   |   |                                                                                    |             |             |      |     |
|-----|------------|---------------------------------------------------------------------------------------------------------------------------------------------------------------------|-------|---|---|------------------------------------------------------------------------------------|-------------|-------------|------|-----|
| 146 | 74308<br>4 | qHTS assay to identify aromatase inhibitors - cell viability counter screen                                                                                         | Tox21 | 0 | 2 | Cytotoxicity, inhibitors, aromatase                                                | 0.779±0.015 | 0.649±0.02  | 5329 | 286 |
| 147 | 74308<br>6 | qHTS assay to identify small molecule that activate the aryl hydrocarbon receptor (AhR) signaling pathway - cell viability counter screen                           | Tox21 | 1 | 1 | Cytotoxicity, Activate, aryl hydrocarbon receptor (AhR)                            | 0.703±0.023 | 0.567±0.029 | 5406 | 156 |
| 148 | 74309<br>1 | qHTS assay to identify small molecule antagonists of the estrogen receptor alpha (ER-alpha) signaling pathway using the BG1 cell line: Summary                      | Tox21 | 1 | 0 | Antagonist, estrogen receptor alpha (ER-alpha)                                     | 0.778±0.016 | 0.643±0.022 | 4945 | 232 |
| 149 | 74312<br>2 | qHTS assay to identify small molecule that activate the aryl hydrocarbon receptor (AhR) signaling pathway: Summary                                                  | Tox21 | 2 | 0 | Activate, aryl hydrocarbon receptor (AhR)                                          | 0.842±0.009 | 0.816±0.009 | 5134 | 666 |
| 150 | 74313<br>9 | qHTS assay to identify aromatase inhibitors: Summary                                                                                                                | Tox21 | 0 | 2 | Inhibitors, Aromatase                                                              | 0.795±0.017 | 0.66±0.024  | 4539 | 187 |
| 151 | 74319<br>1 | qHTS assay to identify small molecule antagonists of the peroxisome proliferator-activated receptor gamma (PPARγ) signaling pathway                                 | Tox21 | 0 | 1 | Antagonist, peroxisome proliferator-activated receptor gamma (PPARγ)               | 0.77±0.022  | 0.537±0.034 | 3473 | 123 |
| 152 | 74319<br>4 | qHTS assay to identify small molecule antagonists of the peroxisome proliferator-activated receptor gamma (PPARγ) signaling pathway - cell viability counter screen | Tox21 | 0 | 1 | Cytotoxicity, Antagonist, peroxisome proliferator-activated receptor gamma (PPARγ) | 0.791±0.015 | 0.649±0.021 | 4930 | 238 |
| 153 | 74320<br>3 | qHTS assay for small molecule agonists of the antioxidant response element (ARE) signaling pathway - cell viability counter screen                                  | Tox21 | 0 | 1 | Cytotoxicity, Agonist, antioxidant response element (ARE)                          | 0.777±0.015 | 0.646±0.02  | 5155 | 264 |
| 154 | 74320<br>9 | qHTS assay for small molecule activators of the heat shock response signaling pathway - cell viability counter screen                                               | Tox21 | 0 | 1 | Cytotoxicity, Activators, heat shock response (counterscreen)                      | 0.765±0.018 | 0.631±0.025 | 5097 | 186 |
| 155 | 74321<br>0 | qHTS assay for small molecule activators of the heat shock response signaling pathway                                                                               | Tox21 | 0 | 1 | Activators, heat shock response                                                    | 0.622±0.06  | 0.468±0.07  | 4682 | 31  |
| 156 | 74321<br>1 | qHTS assay to identify small molecule agonists of the peroxisome proliferator-activated receptor delta (PPARδ) signaling pathway - cell viability counter screen    | Tox21 | 0 | 1 | Cytotoxicity, Agonist, peroxisome proliferator-activated receptor delta (PPARδ)    | 0.795±0.013 | 0.72±0.016  | 4962 | 331 |
| 157 | 74321<br>5 | qHTS assay to identify small molecule antagonists of the peroxisome proliferator-activated receptor delta (PPARδ) signaling pathway                                 | Tox21 | 0 | 1 | Antagonist, peroxisome proliferator-activated receptor delta (PPARδ)               | 0.706±0.031 | 0.602±0.037 | 4419 | 86  |
| 158 | 74321<br>8 | qHTS assay to identify small molecule agonists of the farnesoid-X-receptor (FXR) signaling pathway - cell viability counter screen                                  | Tox21 | 0 | 1 | Cytotoxicity, Agonist, farnesoid-X-receptor (FXR)                                  | 0.775±0.016 | 0.652±0.022 | 4713 | 227 |
| 159 | 74322<br>0 | qHTS assay to identify small molecule agonists of the farnesoid-X-receptor (FXR) signaling pathway                                                                  | Tox21 | 0 | 1 | Agonist, farnesoid-X-receptor (FXR)                                                | 0.7±0.064   | 0.359±0.087 | 4897 | 21  |
| 160 | 74322<br>1 | qHTS assay to identify small molecule antagonists of the farnesoid-X-receptor (FXR) signaling pathway - cell viability counter screen                               | Tox21 | 0 | 1 | Cytotoxicity, Antagonist, farnesoid-X-receptor (FXR)                               | 0.766±0.02  | 0.595±0.028 | 5137 | 152 |
| 161 | 74322<br>4 | qHTS assay to identify small molecule agonists of the vitamin D receptor (VDR) signaling pathway - cell viability counter screen                                    | Tox21 | 0 | 1 | Cytotoxicity, Agonist, vitamin D receptor (VDR)                                    | 0.722±0.016 | 0.625±0.02  | 4992 | 304 |

|     |         |                                                                                                                                           |                                                                                                 |   |   |                                                                   |             |             |      |     |
|-----|---------|-------------------------------------------------------------------------------------------------------------------------------------------|-------------------------------------------------------------------------------------------------|---|---|-------------------------------------------------------------------|-------------|-------------|------|-----|
| 162 | 743225  | qHTS assay to identify small molecule antagonists of the vitamin D receptor (VDR) signaling pathway - cell viability counter screen       | Tox21                                                                                           | 0 | 1 | Cytotoxicity, Antagonist, vitamin D receptor (VDR)                | 0.794±0.016 | 0.608±0.025 | 4838 | 195 |
| 163 | 743227  | qHTS assay to identify small molecule agonists of the peroxisome proliferator-activated receptor delta (PPARδ) signaling pathway: Summary | Tox21                                                                                           | 0 | 1 | Agonist, peroxisome proliferator-activated receptor delta (PPARδ) | 0.789±0.032 | 0.565±0.051 | 5107 | 50  |
| 164 | 743228  | qHTS assay for small molecule activators of the heat shock response signaling pathway: Summary                                            | Tox21                                                                                           | 0 | 1 | Activators, heat shock response                                   | 0.732±0.017 | 0.647±0.02  | 5097 | 279 |
| 165 | 743239  | qHTS assay to identify small molecule agonists of the farnesoid-X-receptor (FXR) signaling pathway: Summary                               | Tox21                                                                                           | 0 | 1 | Agonist, farnesoid-X-receptor (FXR)                               | 0.714±0.035 | 0.409±0.048 | 5308 | 66  |
| 166 | 743240  | qHTS assay to identify small molecule antagonists of the farnesoid-X-receptor (FXR) signaling pathway: Summary                            | Tox21                                                                                           | 1 | 0 | Antagonist, farnesoid-X-receptor (FXR)                            | 0.749±0.02  | 0.574±0.028 | 4874 | 165 |
| 167 | 743242  | qHTS assay to identify small molecule antagonists of the vitamin D receptor (VDR) signaling pathway: Summary                              | Tox21                                                                                           | 1 | 0 | Antagonist, vitamin D receptor (VDR)                              | 0.668±0.046 | 0.366±0.058 | 4835 | 45  |
| 168 | 743244  | qHTS Assay for Identifying Gametocytocidal Compounds                                                                                      | NCGC                                                                                            | 0 | 2 | Plasmodium falciparum                                             | 0.827±0.014 | 0.719±0.019 | 3056 | 243 |
| 169 | 743471  | HepG2 Cytotoxicity Assay Measured in Cell-Based System Using Plate Reader - 7071-02_Inhibitor_Dose_DryPowder_Activity_Set12               | Broad Institute                                                                                 | 0 | 1 | Cytotoxicity, HepG2                                               | 0.584±0.086 | 0.7±0.077   | 76   | 31  |
| 170 | 743472  | A549 Cytotoxicity Assay Measured in Cell-Based System Using Plate Reader - 7071-06_Inhibitor_Dose_DryPowder_Activity_Set12                | Broad Institute                                                                                 | 0 | 1 | Cytotoxicity, A549                                                | 0.674±0.087 | 0.667±0.087 | 75   | 48  |
| 171 | 1053195 | Cell Proliferation Assay Versus the ED40515 IL2 Dependent ATL cell lines                                                                  | NCGC                                                                                            | 0 | 1 | Anticancer, Leukemia                                              | 0.575±0.038 | 0.597±0.037 | 428  | 136 |
| 172 | 1117304 | qHTS Assay for Identifying Compounds that block Entry of Ebola Virus, Screen 2 blue channel                                               | NCGC                                                                                            | 1 | 0 | Virus, Ebola                                                      | 0.846±0.013 | 0.815±0.015 | 1390 | 348 |
| 173 | 1117305 | qHTS Assay for Identifying Compounds that block Entry of Ebola Virus, Screen 2 ratio channel                                              | NCGC                                                                                            | 1 | 0 | Virus, Ebola                                                      | 0.82±0.016  | 0.81±0.016  | 1265 | 293 |
| 174 | 1117312 | qHTS Assay for Identifying Compounds that block Entry of Ebola Virus: Screen2, ratio channel                                              | NCGC                                                                                            | 1 | 0 | Virus, Ebola                                                      | 0.836±0.013 | 0.807±0.014 | 1822 | 371 |
| 175 | 1117325 | nuclear beta catenin stimulation in WNT3A conditioned C2C12 cells-IC50                                                                    | Cheminformatics & Chemogenomics Research Group (CCRG), Indiana University School of Informatics | 1 | 0 | Osteoporosis model                                                | 0.627±0.093 | 0.66±0.09   | 61   | 30  |
| 176 | 1117326 | nuclear beta catenin stimulation in WNT3A conditioned C2C12 cells-screen                                                                  | Cheminformatics & Chemogenomics Research Group (CCRG), Indiana University School of Informatics | 1 | 0 | Osteoporosis model                                                | 0.724±0.036 | 0.56±0.047  | 1821 | 60  |
| 177 | 1117327 | alkaline phosphatase stimulation in WNT3A conditioned C2C12 cells-IC50                                                                    | Cheminformatics & Chemogenomics Research Group (CCRG), Indiana University School of Informatics | 1 | 0 | Osteoporosis model                                                | 0.616±0.093 | 0.68±0.089  | 61   | 30  |

|     |             |                                                                             |                                                                                                 |   |   |                      |             |             |      |     |
|-----|-------------|-----------------------------------------------------------------------------|-------------------------------------------------------------------------------------------------|---|---|----------------------|-------------|-------------|------|-----|
| 178 | 11173<br>29 | insulin secretion from INS-1E cells in the presence of 5 mM glucose-screen  | Cheminformatics & Chemogenomics Research Group (CCRG), Indiana University School of Informatics | 0 | 1 | Diabetes models      | 0.852±0.025 | 0.601±0.05  | 1791 | 48  |
| 179 | 11173<br>36 | GSK3B-pretreated HCT116 viability from Cell TiterGlo-screen                 | Cheminformatics & Chemogenomics Research Group (CCRG), Indiana University School of Informatics | 1 | 0 | Cytotoxicity, HCT116 | 0.757±0.017 | 0.715±0.019 | 1788 | 305 |
| 180 | 11173<br>37 | VEGF stimulated ADSC/ECFC co-culture CD31-stained tube area decrease-IC50   | Cheminformatics & Chemogenomics Research Group (CCRG), Indiana University School of Informatics | 1 | 0 | Angiogenesis model   | 0.676±0.044 | 0.58±0.048  | 251  | 85  |
| 181 | 11173<br>40 | VEGF stimulated ADSC/ECFC co-culture CD31-stained tube area decrease-screen | Cheminformatics & Chemogenomics Research Group (CCRG), Indiana University School of Informatics | 1 | 0 | Angiogenesis model   | 0.728±0.02  | 0.673±0.022 | 1757 | 239 |
| 182 | 11173<br>41 | GLP1 secretion from NCI-H716 cells-screen                                   | Cheminformatics & Chemogenomics Research Group (CCRG), Indiana University School of Informatics | 0 | 1 | Diabetes models      | 0.793±0.03  | 0.644±0.043 | 1788 | 57  |
| 183 | 11173<br>42 | HCT116 viability from Cell TiterGlo-screen                                  | Cheminformatics & Chemogenomics Research Group (CCRG), Indiana University School of Informatics | 1 | 0 | Cytotoxicity, HCT116 | 0.799±0.015 | 0.748±0.017 | 1788 | 340 |
| 184 | 11173<br>43 | SW480 viability from Cell TiterGlo-screen                                   | Cheminformatics & Chemogenomics Research Group (CCRG), Indiana University School of Informatics | 0 | 1 | Cytotoxicity, SW480  | 0.732±0.016 | 0.699±0.016 | 1788 | 514 |
| 185 | 11173<br>46 | DLD-1 viability from Cell TiterGlo-screen                                   | Cheminformatics & Chemogenomics Research Group (CCRG), Indiana University School of Informatics | 1 | 0 | Cytotoxicity, DLD-1  | 0.763±0.017 | 0.738±0.018 | 1788 | 315 |

|     |             |                                                                                                                                                               |                                                                                                 |   |   |                                                                              |             |             |      |     |
|-----|-------------|---------------------------------------------------------------------------------------------------------------------------------------------------------------|-------------------------------------------------------------------------------------------------|---|---|------------------------------------------------------------------------------|-------------|-------------|------|-----|
| 186 | 11173<br>49 | Increased HeLa cells with 2N DNA content-IC50                                                                                                                 | Cheminformatics & Chemogenomics Research Group (CCRG), Indiana University School of Informatics | 1 | 0 | Cell Cycle Modulation (counterscreen)                                        | 0.708±0.078 | 0.77±0.068  | 119  | 18  |
| 187 | 11173<br>50 | Increased chromatin condensation in HeLa cells-IC50                                                                                                           | Cheminformatics & Chemogenomics Research Group (CCRG), Indiana University School of Informatics | 1 | 0 | Cell Cycle Modulation (counterscreen)                                        | 0.685±0.084 | 0.581±0.095 | 120  | 17  |
| 188 | 11595<br>10 | Immunotoxin (HA22) sensitization/mitigation study. Vehicle arm (PBS)                                                                                          | NCGC                                                                                            | 1 | 0 | Immunotoxin (HA22)                                                           | 0.673±0.047 | 0.76±0.043  | 357  | 276 |
| 189 | 11595<br>11 | Immunotoxin (SS1P) sensitization/mitigation study - treatment arm                                                                                             | NCGC                                                                                            | 1 | 0 | Immunotoxin (SS1P)                                                           | 0.8±0.048   | 0.837±0.045 | 374  | 319 |
| 190 | 11595<br>12 | Immunotoxin (HA22) sensitization/mitigation study - treatment arm (low dose)                                                                                  | NCGC                                                                                            | 1 | 0 | Immunotoxin (HA22)                                                           | 0.705±0.056 | 0.816±0.049 | 378  | 328 |
| 191 | 11595<br>13 | Immunotoxin (SS1P) sensitization/mitigation study. Vehicle arm (DMEM)                                                                                         | NCGC                                                                                            | 1 | 0 | Immunotoxin (SS1P)                                                           | 0.699±0.042 | 0.762±0.039 | 307  | 201 |
| 192 | 11595<br>15 | qHTS assay to identify small molecule agonists of the NFkB signaling pathway - cell viability counter screen                                                  | Tox21                                                                                           | 0 | 1 | Cytotoxicity, Agonist, nuclear factor kappa B subunit 1                      | 0.767±0.021 | 0.633±0.029 | 5014 | 132 |
| 193 | 11595<br>17 | qHTS assay to identify small molecule agonists of the endoplasmic reticulum stress response signaling pathway - cell viability counter screen                 | Tox21                                                                                           | 0 | 1 | Cytotoxicity, Agonist, endoplasmic reticulum stress response                 | 0.745±0.021 | 0.664±0.025 | 4923 | 158 |
| 194 | 11595<br>19 | qHTS assay to identify small molecule agonists of the endoplasmic reticulum stress response signaling pathway: Summary                                        | Tox21                                                                                           | 0 | 1 | Agonist, endoplasmic reticulum stress response                               | 0.707±0.041 | 0.546±0.053 | 5098 | 48  |
| 195 | 11595<br>20 | qHTS assay to identify small molecule antagonists of the retinoid-related orphan receptor gamma (ROR-gamma) signaling pathway - cell viability counter screen | Tox21                                                                                           | 0 | 1 | Cytotoxicity, Antagonist, retinoid-related orphan receptor gamma (ROR-gamma) | 0.771±0.016 | 0.597±0.023 | 5426 | 243 |
| 196 | 11595<br>21 | qHTS assay to identify small molecule antagonists of the retinoid-related orphan receptor gamma (ROR-gamma) signaling pathway                                 | Tox21                                                                                           | 1 | 0 | Antagonist, retinoid-related orphan receptor gamma (ROR-gamma)               | 0.778±0.011 | 0.661±0.015 | 5232 | 533 |
| 197 | 11595<br>23 | qHTS assay to identify small molecule antagonists of the retinoid-related orphan receptor gamma (ROR-gamma) signaling pathway: Summary                        | Tox21                                                                                           | 1 | 0 | Antagonist, retinoid-related orphan receptor gamma (ROR-gamma)               | 0.798±0.013 | 0.627±0.02  | 4140 | 324 |
| 198 | 11595<br>25 | qHTS assay to identify small molecule agonists of the AP-1 signaling pathway - cell viability counter screen                                                  | Tox21                                                                                           | 0 | 1 | Cytotoxicity, Agonist, AP-1                                                  | 0.765±0.02  | 0.663±0.026 | 5494 | 156 |
| 199 | 11595<br>28 | qHTS assay to identify small molecule agonists of the AP-1 signaling pathway: Summary                                                                         | Tox21                                                                                           | 1 | 0 | Agonist, AP-1                                                                | 0.744±0.015 | 0.701±0.016 | 5299 | 361 |
| 200 | 11595<br>29 | qHTS assay to identify small molecule agonists of the RXR signaling pathway - cell viability counter screen                                                   | Tox21                                                                                           | 0 | 1 | Cytotoxicity, Agonist, RXR                                                   | 0.778±0.014 | 0.711±0.017 | 5175 | 318 |
| 201 | 11595<br>51 | qHTS assay to identify small molecule antagonists of the retinoid acid receptor (RAR) signaling pathway - cell viability counter screen                       | Tox21                                                                                           | 0 | 1 | Cytotoxicity, Antagonist, retinoid acid receptor (RAR)                       | 0.729±0.028 | 0.509±0.038 | 5522 | 95  |

|     |             |                                                                                                                                                                                                            |                         |   |   |                                                               |             |             |      |     |
|-----|-------------|------------------------------------------------------------------------------------------------------------------------------------------------------------------------------------------------------------|-------------------------|---|---|---------------------------------------------------------------|-------------|-------------|------|-----|
| 202 | 11595<br>53 | qHTS assay to identify small molecule agonists of the retinoic acid receptor (RAR) signaling pathway                                                                                                       | Tox21                   | 0 | 1 | Agonist, retinoic acid receptor (RAR)                         | 0.818±0.012 | 0.722±0.017 | 4789 | 298 |
| 203 | 11595<br>55 | qHTS assay to identify small molecule antagonists of the retinoic acid receptor (RAR) signaling pathway: Summary                                                                                           | Tox21                   | 1 | 0 | Antagonist, retinoic acid receptor (RAR)                      | 0.768±0.014 | 0.676±0.017 | 4219 | 362 |
| 204 | 11595<br>80 | The chemical genetic matrix (CGM) dataset as reported in Wildenhain et al. (2015) Prediction of Synergism from Chemical-Genetic Interactions by Machine Learning. Cell Systems Volume 1, Issue 6, p383-395 | chemical genetic matrix | 0 | 4 | Synergism from Chemical-Genetic Interactions                  | 0.725±0.014 | 0.693±0.015 | 4766 | 486 |
| 205 | 12248<br>35 | qHTS assay to identify small molecule inhibitors of firefly luciferase                                                                                                                                     | Tox21                   | 0 | 1 | Interference, Luciferase                                      | 0.848±0.009 | 0.736±0.013 | 5461 | 515 |
| 206 | 12248<br>36 | qHTS assay to identify small molecule agonists of the constitutive androstane receptor (CAR) signaling pathway - cell viability counter screen                                                             | Tox21                   | 0 | 1 | Cytotoxicity, Agonist, constitutive androstane receptor (CAR) | 0.758±0.018 | 0.586±0.025 | 5453 | 202 |
| 207 | 12248<br>38 | qHTS assay to identify small molecule antagonists of the constitutive androstane receptor (CAR) signaling pathway                                                                                          | Tox21                   | 1 | 0 | Antagonist, constitutive androstane receptor (CAR)            | 0.698±0.019 | 0.566±0.023 | 5524 | 253 |
| 208 | 12248<br>39 | qHTS assay to identify small molecule agonists of the constitutive androstane receptor (CAR) signaling pathway                                                                                             | Tox21                   | 0 | 1 | Agonist, constitutive androstane receptor (CAR)               | 0.841±0.009 | 0.803±0.01  | 5367 | 612 |
| 209 | 12248<br>43 | qHTS assay to identify small molecule agonists of the thyroid stimulating hormone receptor (TSHR) signaling pathway                                                                                        | Tox21                   | 0 | 1 | Agonist, thyroid stimulating hormone receptor (TSHR)          | 0.773±0.018 | 0.649±0.024 | 5189 | 180 |
| 210 | 12248<br>44 | qHTS assay to identify small molecule agonists of the hypoxia (HIF-1) signaling pathway - cell viability counter screen                                                                                    | Tox21                   | 0 | 1 | Cytotoxicity, Agonist, hypoxia                                | 0.744±0.016 | 0.613±0.02  | 5303 | 313 |
| 211 | 12248<br>45 | qHTS assay to identify small molecule agonists of H2AX                                                                                                                                                     | Tox21                   | 0 | 1 | Agonist, Histone H2A.x                                        | 0.717±0.026 | 0.551±0.033 | 5032 | 121 |
| 212 | 12248<br>47 | qHTS assay to identify small molecule agonists of H2AX - cell viability counter screen                                                                                                                     | Tox21                   | 0 | 1 | Cytotoxicity, Agonist, Histone H2A.x                          | 0.835±0.011 | 0.745±0.014 | 5175 | 363 |
| 213 | 12248<br>67 | qHTS RealTime-Glo MT Cell Viability Assay in HepG2 cells - 24 hour                                                                                                                                         | Tox21                   | 0 | 1 | Cytotoxicity, HepG2                                           | 0.805±0.017 | 0.598±0.027 | 5540 | 162 |
| 214 | 12248<br>68 | qHTS RealTime-Glo MT Cell Viability Assay in HEK293 cells - 32 hour                                                                                                                                        | Tox21                   | 1 | 0 | Cytotoxicity, HEK293                                          | 0.826±0.009 | 0.725±0.013 | 5130 | 589 |
| 215 | 12248<br>69 | A CellTox Green Cytotoxicity Assay to monitor cytotoxicity in HEK293 cells - 0 hour                                                                                                                        | Tox21                   | 0 | 1 | Cytotoxicity, HEK293                                          | 0.582±0.056 | 0.433±0.063 | 5731 | 39  |
| 216 | 12248<br>70 | qHTS RealTime-Glo MT Cell Viability Assay in HepG2 cells - 40 hour                                                                                                                                         | Tox21                   | 0 | 1 | Cytotoxicity, HepG2                                           | 0.763±0.02  | 0.578±0.028 | 5579 | 158 |
| 217 | 12248<br>71 | A CellTox Green Cytotoxicity Assay to monitor cytotoxicity in HEK293 cells - 40 hour                                                                                                                       | Tox21                   | 0 | 1 | Cytotoxicity, HEK293                                          | 0.73±0.015  | 0.675±0.016 | 5298 | 385 |
| 218 | 12248<br>72 | qHTS RealTime-Glo MT Cell Viability Assay in HEK293 cells - 16 hour                                                                                                                                        | Tox21                   | 0 | 1 | Cytotoxicity, HEK293                                          | 0.829±0.01  | 0.724±0.014 | 5155 | 430 |
| 219 | 12248<br>73 | qHTS RealTime-Glo MT Cell Viability Assay in HepG2 cells - 8 hour                                                                                                                                          | Tox21                   | 0 | 1 | Cytotoxicity, HepG2                                           | 0.79±0.021  | 0.559±0.033 | 5476 | 115 |
| 220 | 12248<br>74 | qHTS RealTime-Glo MT Cell Viability Assay in HEK293 cells - 40 hour                                                                                                                                        | Tox21                   | 1 | 0 | Cytotoxicity, HEK293                                          | 0.818±0.009 | 0.723±0.012 | 5146 | 616 |
| 221 | 12248<br>75 | A CellTox Green Cytotoxicity Assay to monitor cytotoxicity in HEK293 cells - 24 hour                                                                                                                       | Tox21                   | 0 | 1 | Cytotoxicity, HEK293                                          | 0.723±0.018 | 0.623±0.022 | 5412 | 239 |

|     |             |                                                                                                                                                                                                                   |       |   |   |                                                              |             |             |      |     |
|-----|-------------|-------------------------------------------------------------------------------------------------------------------------------------------------------------------------------------------------------------------|-------|---|---|--------------------------------------------------------------|-------------|-------------|------|-----|
| 222 | 12248<br>76 | A CellTox Green Cytotoxicity Assay to monitor cytotoxicity in HepG2 cells - 16 hour                                                                                                                               | Tox21 | 0 | 1 | Cytotoxicity, HepG2                                          | 0.733±0.018 | 0.617±0.022 | 5451 | 237 |
| 223 | 12248<br>77 | qHTS RealTime-Glo MT Cell Viability Assay in HepG2 cells - 32 hour                                                                                                                                                | Tox21 | 0 | 1 | Cytotoxicity, HepG2                                          | 0.777±0.019 | 0.594±0.027 | 5555 | 163 |
| 224 | 12248<br>78 | A CellTox Green Cytotoxicity Assay to monitor cytotoxicity in HepG2 cells - 24 hour                                                                                                                               | Tox21 | 0 | 1 | Cytotoxicity, HepG2                                          | 0.747±0.015 | 0.676±0.017 | 5341 | 342 |
| 225 | 12248<br>79 | A CellTox Green Cytotoxicity Assay to monitor cytotoxicity in HepG2 cells - 40 hour                                                                                                                               | Tox21 | 0 | 1 | Cytotoxicity, HepG2                                          | 0.779±0.012 | 0.693±0.014 | 5275 | 483 |
| 226 | 12248<br>80 | qHTS RealTime-Glo MT Cell Viability Assay in HEK293 cells - 0 hour                                                                                                                                                | Tox21 | 0 | 1 | Cytotoxicity, HEK293                                         | 0.824±0.023 | 0.567±0.042 | 5565 | 72  |
| 227 | 12248<br>81 | A CellTox Green Cytotoxicity Assay to monitor cytotoxicity in HEK293 cells - 32 hour                                                                                                                              | Tox21 | 0 | 1 | Cytotoxicity, HEK293                                         | 0.717±0.016 | 0.65±0.019  | 5343 | 309 |
| 228 | 12248<br>83 | A CellTox Green Cytotoxicity Assay to monitor cytotoxicity in HepG2 cells - 32 hour                                                                                                                               | Tox21 | 0 | 1 | Cytotoxicity, HepG2                                          | 0.759±0.013 | 0.691±0.016 | 5304 | 420 |
| 229 | 12248<br>84 | A CellTox Green Cytotoxicity Assay to monitor cytotoxicity in HEK293 cells - 8 hour                                                                                                                               | Tox21 | 0 | 1 | Cytotoxicity, HEK293                                         | 0.603±0.032 | 0.496±0.036 | 5513 | 115 |
| 230 | 12248<br>85 | qHTS RealTime-Glo MT Cell Viability Assay in HepG2 cells - 16 hour                                                                                                                                                | Tox21 | 0 | 1 | Cytotoxicity, HepG2                                          | 0.787±0.019 | 0.593±0.029 | 5523 | 150 |
| 231 | 12248<br>87 | qHTS RealTime-Glo MT Cell Viability Assay in HEK293 cells - 8 hour                                                                                                                                                | Tox21 | 0 | 1 | Cytotoxicity, HEK293                                         | 0.804±0.012 | 0.724±0.016 | 5232 | 338 |
| 232 | 12248<br>88 | A CellTox Green Cytotoxicity Assay to monitor cytotoxicity in HEK293 cells - 16 hour                                                                                                                              | Tox21 | 0 | 1 | Cytotoxicity, HEK293                                         | 0.696±0.024 | 0.542±0.03  | 5479 | 150 |
| 233 | 12248<br>89 | qHTS RealTime-Glo MT Cell Viability Assay in HepG2 cells - 0 hour                                                                                                                                                 | Tox21 | 0 | 1 | Cytotoxicity, HepG2                                          | 0.893±0.013 | 0.71±0.028  | 5579 | 106 |
| 234 | 12248<br>90 | A CellTox Green Cytotoxicity Assay to monitor cytotoxicity in HepG2 cells - 8 hour                                                                                                                                | Tox21 | 0 | 1 | Cytotoxicity, HepG2                                          | 0.7±0.024   | 0.542±0.03  | 5545 | 153 |
| 235 | 12248<br>94 | qHTS assay to identify small molecule agonists of the hypoxia (HIF-1) signaling pathway: Summary                                                                                                                  | Tox21 | 0 | 1 | Agonist, hypoxia                                             | 0.622±0.065 | 0.349±0.076 | 5490 | 27  |
| 236 | 12248<br>95 | qHTS assay to identify small molecule agonists of the thyroid stimulating hormone receptor (TSHR) signaling pathway: Summary                                                                                      | Tox21 | 0 | 1 | Agonist, thyroid stimulating hormone receptor (TSHR)         | 0.77±0.016  | 0.653±0.021 | 5427 | 228 |
| 237 | 12248<br>96 | qHTS assay to identify small molecule agonists of H2AX: Summary                                                                                                                                                   | Tox21 | 0 | 1 | Agonist, Histone H2A.x                                       | 0.754±0.016 | 0.589±0.022 | 5462 | 269 |
| 238 | 12592<br>41 | qHTS assay to identify small molecule antagonists of the estrogen receptor alpha (ER-alpha) signaling pathway using the BG1 cell line in the presence of 0.1 nM 17-beta-estradiol - cell viability counter screen | Tox21 | 0 | 1 | Cytotoxicity, Antagonist, estrogen receptor alpha (ER-alpha) | 0.813±0.019 | 0.622±0.03  | 5531 | 124 |
| 239 | 12592<br>42 | qHTS assay to identify small molecule antagonists of the androgen receptor (AR) signaling pathway using the MDA cell line in the presence of 0.5 nM R1881 - cell viability counter screen                         | Tox21 | 0 | 1 | Cytotoxicity, Antagonist, androgen receptor (AR)             | 0.767±0.021 | 0.586±0.03  | 5551 | 141 |
| 240 | 12592<br>43 | qHTS assay to identify small molecule antagonists of the androgen receptor (AR) signaling pathway using the MDA cell line in the presence of 0.5 nM R1881                                                         | Tox21 | 0 | 1 | Antagonist, androgen receptor (AR)                           | 0.846±0.008 | 0.787±0.009 | 5344 | 797 |
| 241 | 12592<br>44 | qHTS assay to identify small molecule antagonists of the estrogen receptor alpha (ER-alpha) signaling pathway using the BG1 cell line in the presence of 0.1 nM 17-beta-estradiol                                 | Tox21 | 0 | 1 | Antagonist, estrogen receptor alpha (ER-alpha)               | 0.763±0.014 | 0.674±0.018 | 5416 | 333 |

|     |             |                                                                                                                                                                                            |       |   |   |                                                |             |             |      |     |
|-----|-------------|--------------------------------------------------------------------------------------------------------------------------------------------------------------------------------------------|-------|---|---|------------------------------------------------|-------------|-------------|------|-----|
| 242 | 12592<br>47 | qHTS assay to identify small molecule antagonists of the androgen receptor (AR) signaling pathway using the MDA cell line in the presence of 0.5 nM R1881: Summary                         | Tox21 | 0 | 1 | Antagonist, androgen receptor (AR)             | 0.846±0.008 | 0.79±0.01   | 4822 | 721 |
| 243 | 12592<br>48 | qHTS assay to identify small molecule antagonists of the estrogen receptor alpha (ER-alpha) signaling pathway using the BG1 cell line in the presence of 0.1 nM 17-beta-estradiol: Summary | Tox21 | 0 | 1 | Antagonist, estrogen receptor alpha (ER-alpha) | 0.81±0.013  | 0.683±0.018 | 5059 | 299 |

**Table S5:** Validation of lignans bioactivity prediction with new models built without lignans. For SVM and Naïve Bayes prediction the lignans were considered active if Pa-pi score was better than 0.15 and Pa-Pi minimum limit was positive. The final prediction takes both methods, if one of the methods points that compound is active it is predicted as active.

| CID   | Name            | AID     | Activity Class                                                    | Exper. Activity | Pa-Pi SVM     | SVM Prediction | Pa-Pi Bayes  | Bayes Prediction | Final Prediction | Correct? |
|-------|-----------------|---------|-------------------------------------------------------------------|-----------------|---------------|----------------|--------------|------------------|------------------|----------|
| 10607 | podophyllotoxin | 493027  | 1-acylglycerol-3-phosphate O-acyltransferase ABHD5                | Inactive        | 0.48±0.284    | Active         | 0.136±0.843  | Inactive         | Active           |          |
| 10607 | podophyllotoxin | 493035  | 1-acylglycerol-3-phosphate O-acyltransferase ABHD5                | Inactive        | 0.571±0.307   | Active         | 0.107±0.884  | Inactive         | Active           |          |
| 10607 | podophyllotoxin | 743122  | Activate, aryl hydrocarbon receptor (AhR)                         | Active          | 0.157±0.175   | Inactive       | -0.02±0.042  | Inactive         | Inactive         |          |
| 10607 | podophyllotoxin | 743210  | Activators, heat shock response                                   | Inactive        | -0.082±0.183  | Inactive       | -0.835±0.19  | NA               | Inactive         | OK       |
| 10607 | podophyllotoxin | 743228  | Activators, heat shock response                                   | Inactive        | -0.984±-0.003 | Inactive       | -0.866±0.488 | Inactive         | Inactive         | OK       |
| 10607 | podophyllotoxin | 884     | ADMET, Cytochrome P450 3A4                                        | Active          | 0.479±0.012   | Active         | -0.453±0.309 | Inactive         | Active           | OK       |
| 10607 | podophyllotoxin | 885     | ADMET, Cytochrome P450 3A4                                        | Inactive        | -0.391±0.016  | Inactive       | -0.714±0.187 | Inactive         | Inactive         | OK       |
| 10607 | podophyllotoxin | 743040  | Agonist, androgen receptor (AR)                                   | Inactive        | -0.861±-0.029 | Inactive       | -0.831±0.385 | Inactive         | Inactive         | OK       |
| 10607 | podophyllotoxin | 1159528 | Agonist, AP-1                                                     | Active          | -0.968±-0.01  | Inactive       | -0.851±0.388 | Inactive         | Inactive         |          |
| 10607 | podophyllotoxin | 1224839 | Agonist, constitutive androstane receptor (CAR)                   | Inactive        | -0.649±0.194  | Inactive       | -0.667±0.268 | Inactive         | Inactive         | OK       |
| 10607 | podophyllotoxin | 1159519 | Agonist, endoplasmic reticulum stress response                    | Inactive        | -0.589±0.025  | Inactive       | -0.639±0.641 | Inactive         | Inactive         | OK       |
| 10607 | podophyllotoxin | 743079  | Agonist, estrogen receptor alpha (ER-alpha)                       | Inactive        | -0.334±0.227  | Inactive       | -0.708±0.334 | Inactive         | Inactive         | OK       |
| 10607 | podophyllotoxin | 743220  | Agonist, farnesoid-X-receptor (FXR)                               | Inactive        | -0.573±0.068  | Inactive       | -0.695±0.217 | NA               | Inactive         | OK       |
| 10607 | podophyllotoxin | 743239  | Agonist, farnesoid-X-receptor (FXR)                               | Inactive        | -0.952±-0.091 | Inactive       | -0.784±0.688 | NA               | Inactive         | OK       |
| 10607 | podophyllotoxin | 720691  | Agonist, glucocorticoid receptor (GR)                             | Inactive        | 0.081±0.142   | Inactive       | -0.732±0.061 | Inactive         | Inactive         | OK       |
| 10607 | podophyllotoxin | 720719  | Agonist, glucocorticoid receptor (GR)                             | Inactive        | 0.123±0.132   | Inactive       | -0.722±0.412 | Inactive         | Inactive         | OK       |
| 10607 | podophyllotoxin | 1224845 | Agonist, Histone H2A.x                                            | Inactive        | -0.399±0.177  | Inactive       | -0.81±0.333  | Inactive         | Inactive         | OK       |
| 10607 | podophyllotoxin | 1224896 | Agonist, Histone H2A.x                                            | Inactive        | -0.947±0.011  | Inactive       | -0.725±0.55  | Inactive         | Inactive         | OK       |
| 10607 | podophyllotoxin | 1224894 | Agonist, hypoxia                                                  | Inactive        | -0.743±0.077  | Inactive       | -0.576±0.235 | NA               | Inactive         | OK       |
| 10607 | podophyllotoxin | 651631  | Agonist, p53                                                      | Inactive        | -0.506±0.186  | Inactive       | 0.295±0.705  | Inactive         | Inactive         | OK       |
| 10607 | podophyllotoxin | 720552  | Agonist, p53                                                      | Inactive        | -0.579±0.196  | Inactive       | 0.507±0.813  | Inactive         | Inactive         | OK       |
| 10607 | podophyllotoxin | 743227  | Agonist, peroxisome proliferator-activated receptor delta (PPARδ) | Inactive        | -0.856±-0.15  | Inactive       | -0.788±0.202 | Inactive         | Inactive         | OK       |
| 10607 | podophyllotoxin | 1159553 | Agonist, retinoic acid receptor (RAR)                             | Inactive        | -0.643±0.038  | Inactive       | -0.673±0.407 | Inactive         | Inactive         | OK       |

|       |                 |         |                                                                      |          |               |          |              |          |          |           |
|-------|-----------------|---------|----------------------------------------------------------------------|----------|---------------|----------|--------------|----------|----------|-----------|
| 10607 | podophyllotoxin | 743066  | Agonist, thyroid receptor (TR)                                       | Inactive | -0.973±-0.008 | Inactive | -0.836±0.22  | Inactive | Inactive | <b>OK</b> |
| 10607 | podophyllotoxin | 1224843 | Agonist, thyroid stimulating hormone receptor (TSHR)                 | Inactive | -0.974±-0.017 | Inactive | -0.9±0.484   | Inactive | Inactive | <b>OK</b> |
| 10607 | podophyllotoxin | 1224895 | Agonist, thyroid stimulating hormone receptor (TSHR)                 | Inactive | -0.778±0.037  | Inactive | -0.923±0.271 | Inactive | Inactive | <b>OK</b> |
| 10607 | podophyllotoxin | 575     | Angiogenesis model                                                   | Inactive | 0.209±0.223   | Inactive | 0.064±0.821  | Inactive | Inactive | <b>OK</b> |
| 10607 | podophyllotoxin | 1117337 | Angiogenesis model                                                   | Active   | 0.729±0.153   | Active   | 0.324±0.281  | Active   | Active   | <b>OK</b> |
| 10607 | podophyllotoxin | 1117340 | Angiogenesis model                                                   | Active   | 0.298±0.195   | Active   | -0.509±0.583 | Inactive | Active   | <b>OK</b> |
| 10607 | podophyllotoxin | 743035  | Antagonist, androgen receptor (AR)                                   | Active   | -0.853±0.099  | Inactive | -0.244±0.494 | Inactive | Inactive |           |
| 10607 | podophyllotoxin | 743042  | Antagonist, androgen receptor (AR)                                   | Inactive | -0.903±0.071  | Inactive | -0.637±0.442 | Inactive | Inactive | <b>OK</b> |
| 10607 | podophyllotoxin | 743063  | Antagonist, androgen receptor (AR)                                   | Active   | -0.982±-0.001 | Inactive | -0.621±0.376 | Inactive | Inactive |           |
| 10607 | podophyllotoxin | 1259243 | Antagonist, androgen receptor (AR)                                   | Inactive | -0.755±0.117  | Inactive | -0.302±0.397 | Inactive | Inactive | <b>OK</b> |
| 10607 | podophyllotoxin | 1259247 | Antagonist, androgen receptor (AR)                                   | Inactive | 0.085±0.14    | Inactive | 0.13±0.065   | Inactive | Inactive | <b>OK</b> |
| 10607 | podophyllotoxin | 1224838 | Antagonist, constitutive androstane receptor (CAR)                   | Active   | -0.785±0.069  | Inactive | -0.891±0.544 | Inactive | Inactive |           |
| 10607 | podophyllotoxin | 743069  | Antagonist, estrogen receptor alpha (ER-alpha)                       | Inactive | -0.852±0.025  | Inactive | -0.659±0.471 | Inactive | Inactive | <b>OK</b> |
| 10607 | podophyllotoxin | 743078  | Antagonist, estrogen receptor alpha (ER-alpha)                       | Inactive | -0.876±0.022  | Inactive | -0.558±0.117 | Inactive | Inactive | <b>OK</b> |
| 10607 | podophyllotoxin | 743080  | Antagonist, estrogen receptor alpha (ER-alpha)                       | Active   | -0.835±0.079  | Inactive | -0.577±0.464 | Inactive | Inactive |           |
| 10607 | podophyllotoxin | 743091  | Antagonist, estrogen receptor alpha (ER-alpha)                       | Active   | -0.805±0.107  | Inactive | -0.52±0.448  | Inactive | Inactive |           |
| 10607 | podophyllotoxin | 1259244 | Antagonist, estrogen receptor alpha (ER-alpha)                       | Inactive | -0.988±0.001  | Inactive | -0.796±0.11  | Inactive | Inactive | <b>OK</b> |
| 10607 | podophyllotoxin | 1259248 | Antagonist, estrogen receptor alpha (ER-alpha)                       | Inactive | -0.973±0.007  | Inactive | -0.718±0.425 | Inactive | Inactive | <b>OK</b> |
| 10607 | podophyllotoxin | 743240  | Antagonist, farnesoid-X-receptor (FXR)                               | Active   | -0.777±0.072  | Inactive | -0.731±0.561 | Inactive | Inactive |           |
| 10607 | podophyllotoxin | 624479  | Antagonist, NFkB Signaling Pathway                                   | Inactive | -0.976±0.044  | Inactive | -0.73±0.462  | Inactive | Inactive | <b>OK</b> |
| 10607 | podophyllotoxin | 743215  | Antagonist, peroxisome proliferator-activated receptor delta (PPARd) | Inactive | -0.958±-0.091 | Inactive | -0.87±0.611  | Inactive | Inactive | <b>OK</b> |
| 10607 | podophyllotoxin | 743191  | Antagonist, peroxisome proliferator-activated receptor gamma (PPARg) | Inactive | 0.23±0.258    | Inactive | -0.384±0.593 | Inactive | Inactive | <b>OK</b> |
| 10607 | podophyllotoxin | 1159555 | Antagonist, retinoic acid receptor (RAR)                             | Active   | -0.762±0.105  | Inactive | -0.742±0.415 | Inactive | Inactive |           |
| 10607 | podophyllotoxin | 1159521 | Antagonist, retinoid-related orphan receptor gamma (ROR-gamma)       | Active   | -0.978±0.011  | Inactive | -0.657±0.388 | Inactive | Inactive |           |

|       |                 |         |                                                                |          |              |          |              |          |          |           |
|-------|-----------------|---------|----------------------------------------------------------------|----------|--------------|----------|--------------|----------|----------|-----------|
| 10607 | podophyllotoxin | 1159523 | Antagonist, retinoid-related orphan receptor gamma (ROR-gamma) | Active   | -0.958±0.036 | Inactive | -0.01±0.568  | Inactive | Inactive |           |
| 10607 | podophyllotoxin | 743065  | Antagonist, thyroid receptor (TR)                              | Active   | -0.934±0.033 | Inactive | -0.054±0.068 | Inactive | Inactive |           |
| 10607 | podophyllotoxin | 743067  | Antagonist, thyroid receptor (TR)                              | Active   | -0.141±0.327 | Inactive | 0.05±0.646   | Inactive | Inactive |           |
| 10607 | podophyllotoxin | 743242  | Antagonist, vitamin D receptor (VDR)                           | Active   | -0.869±0.168 | Inactive | -0.707±0.696 | NA       | Inactive |           |
| 10607 | podophyllotoxin | 1834    | Anticancer, colon                                              | Active   | -0.482±0.321 | Inactive | -0.677±0.088 | Inactive | Inactive |           |
| 10607 | podophyllotoxin | 771     | Anticancer, Colon Tumor                                        | Inactive | -0.886±0.169 | Inactive | -0.915±0.482 | Inactive | Inactive | <b>OK</b> |
| 10607 | podophyllotoxin | 250     | Anticancer, Leukemia                                           | Inactive | -0.935±0.11  | Inactive | -0.897±0.631 | Inactive | Inactive | <b>OK</b> |
| 10607 | podophyllotoxin | 258     | Anticancer, Leukemia                                           | Inactive | -0.459±0.231 | Inactive | -0.827±0.527 | Inactive | Inactive | <b>OK</b> |
| 10607 | podophyllotoxin | 328     | Anticancer, Leukemia                                           | Active   | 0.591±0.058  | Active   | -0.249±0.5   | Inactive | Active   | <b>OK</b> |
| 10607 | podophyllotoxin | 1053195 | Anticancer, Leukemia                                           | Inactive | 0.435±0.304  | Active   | 0.863±0.053  | Active   | Active   |           |
| 10607 | podophyllotoxin | 270     | Anticancer, Lung Tumor                                         | Inactive | -0.023±0.282 | Inactive | -0.833±0.491 | Inactive | Inactive | <b>OK</b> |
| 10607 | podophyllotoxin | 192     | Anticancer, Melanoma                                           | Inactive | 0.069±0.165  | Inactive | -0.065±0.583 | Inactive | Inactive | <b>OK</b> |
| 10607 | podophyllotoxin | 651558  | Anticancer, non-Hodgkin lymphoma                               | Active   | -0.213±0.26  | Inactive | -0.485±0.091 | Inactive | Inactive |           |
| 10607 | podophyllotoxin | 651568  | Anticancer, non-Hodgkin lymphoma                               | Inactive | -0.555±0.009 | Inactive | 0.775±0.252  | Active   | Active   |           |
| 10607 | podophyllotoxin | 292     | Anticancer, Sarcoma                                            | Active   | 0.294±0.242  | Active   | -0.372±0.547 | Inactive | Active   | <b>OK</b> |
| 10607 | podophyllotoxin | 686947  | Anticancer, Yes1 kinase                                        | Inactive | -0.573±0.128 | Inactive | -0.674±0.285 | Inactive | Inactive | <b>OK</b> |
| 10607 | podophyllotoxin | 438     | Anti-Inflammatory model                                        | Active   | -0.51±0.033  | Inactive | 0.327±0.863  | NA       | Inactive |           |
| 10607 | podophyllotoxin | 457     | Anti-Inflammatory model                                        | Inactive | 0.349±0.378  | Inactive | 0.482±0.873  | Inactive | Inactive | <b>OK</b> |
| 10607 | podophyllotoxin | 1267    | Anti-Inflammatory model                                        | Inactive | -0.823±0.161 | Inactive | 0.855±0.061  | Active   | Active   |           |
| 10607 | podophyllotoxin | 1309    | Anti-Inflammatory model                                        | Active   | 0.654±0.22   | Active   | 0.324±0.739  | Inactive | Active   | <b>OK</b> |
| 10607 | podophyllotoxin | 435020  | Anti-Inflammatory model                                        | Active   | 0.852±0.061  | Active   | 0.921±0.058  | Active   | Active   | <b>OK</b> |
| 10607 | podophyllotoxin | 489033  | Anti-Inflammatory model                                        | Inactive | -0.223±0.14  | Inactive | 0.925±0.026  | Active   | Active   |           |
| 10607 | podophyllotoxin | 489035  | Anti-Inflammatory model                                        | Inactive | -0.204±0.239 | Inactive | 0.924±0.039  | Active   | Active   |           |
| 10607 | podophyllotoxin | 602277  | Anti-Inflammatory model                                        | Active   | 0.589±0.347  | Active   | -0.019±0.765 | Inactive | Active   | <b>OK</b> |
| 10607 | podophyllotoxin | 1318    | Anti-Inflammatory model (counterscreen)                        | Inactive | -0.787±0.052 | Inactive | 0.129±0.114  | Inactive | Inactive | <b>OK</b> |
| 10607 | podophyllotoxin | 357     | AP1 Signaling Pathway                                          | Inactive | 0.031±0.173  | Inactive | -0.35±0.302  | Inactive | Inactive | <b>OK</b> |
| 10607 | podophyllotoxin | 504459  | beta-2 adrenergic receptor                                     | Inactive | 0.179±0.485  | Inactive | -0.26±0.857  | Inactive | Inactive | <b>OK</b> |
| 10607 | podophyllotoxin | 1117349 | Cell Cycle Modulation (counterscreen)                          | Active   | 0.306±0.111  | Active   | -0.295±0.305 | Inactive | Active   | <b>OK</b> |
| 10607 | podophyllotoxin | 1117350 | Cell Cycle Modulation (counterscreen)                          | Active   | 0.179±0.177  | Active   | -0.336±0.594 | Inactive | Active   | <b>OK</b> |

|       |                 |         |                                                                                 |          |               |          |              |          |          |    |
|-------|-----------------|---------|---------------------------------------------------------------------------------|----------|---------------|----------|--------------|----------|----------|----|
| 10607 | podophyllotoxin | 463189  | Chlamydomonas reinhardtii Algae Gravitaxis                                      | Inactive | -0.992±0.019  | Inactive | -0.923±0.775 | Inactive | Inactive | OK |
| 10607 | podophyllotoxin | 624476  | Cytotoxicity                                                                    | Inactive | -0.753±0.208  | Inactive | -0.725±0.561 | Inactive | Inactive | OK |
| 10607 | podophyllotoxin | 371     | Cytotoxicity, A549                                                              | Active   | -0.815±0.007  | Inactive | -0.914±0.429 | Inactive | Inactive |    |
| 10607 | podophyllotoxin | 743086  | Cytotoxicity, Activate, aryl hydrocarbon receptor (AhR)                         | Inactive | 0.717±0.195   | Active   | -0.528±0.587 | Inactive | Active   |    |
| 10607 | podophyllotoxin | 743209  | Cytotoxicity, Activators, heat shock response (counterscreen)                   | Inactive | -0.967±-0.015 | Inactive | -0.911±0.506 | Inactive | Inactive | OK |
| 10607 | podophyllotoxin | 743203  | Cytotoxicity, Agonist, antioxidant response element (ARE)                       | Inactive | -0.978±0.001  | Inactive | -0.933±0.464 | Inactive | Inactive | OK |
| 10607 | podophyllotoxin | 1159525 | Cytotoxicity, Agonist, AP-1                                                     | Inactive | -0.971±-0.025 | Inactive | -0.947±0.507 | Inactive | Inactive | OK |
| 10607 | podophyllotoxin | 1224836 | Cytotoxicity, Agonist, constitutive androstane receptor (CAR)                   | Inactive | -0.064±0.295  | Inactive | -0.796±0.527 | Inactive | Inactive | OK |
| 10607 | podophyllotoxin | 1159517 | Cytotoxicity, Agonist, endoplasmic reticulum stress response                    | Inactive | -0.971±0.01   | Inactive | -0.933±0.525 | Inactive | Inactive | OK |
| 10607 | podophyllotoxin | 743218  | Cytotoxicity, Agonist, farnesoid-X-receptor (FXR)                               | Inactive | -0.984±-0.006 | Inactive | -0.871±0.45  | Inactive | Inactive | OK |
| 10607 | podophyllotoxin | 1224847 | Cytotoxicity, Agonist, Histone H2A.x                                            | Inactive | -0.978±-0.007 | Inactive | -0.789±0.359 | Inactive | Inactive | OK |
| 10607 | podophyllotoxin | 1224844 | Cytotoxicity, Agonist, hypoxia                                                  | Inactive | -0.987±0.003  | Inactive | -0.905±0.471 | Inactive | Inactive | OK |
| 10607 | podophyllotoxin | 1159515 | Cytotoxicity, Agonist, nuclear factor kappa B subunit 1                         | Inactive | -0.986±0.019  | Inactive | -0.937±0.549 | Inactive | Inactive | OK |
| 10607 | podophyllotoxin | 651633  | Cytotoxicity, Agonist, p53                                                      | Inactive | -0.965±-0.001 | Inactive | -0.799±0.455 | Inactive | Inactive | OK |
| 10607 | podophyllotoxin | 743211  | Cytotoxicity, Agonist, peroxisome proliferator-activated receptor delta (PPARd) | Inactive | -0.983±-0.006 | Inactive | -0.818±0.391 | Inactive | Inactive | OK |
| 10607 | podophyllotoxin | 1159529 | Cytotoxicity, Agonist, RXR                                                      | Inactive | -0.987±-0.004 | Inactive | -0.903±0.204 | Inactive | Inactive | OK |
| 10607 | podophyllotoxin | 743224  | Cytotoxicity, Agonist, vitamin D receptor (VDR)                                 | Inactive | -0.98±0.012   | Inactive | -0.905±0.491 | Inactive | Inactive | OK |
| 10607 | podophyllotoxin | 743033  | Cytotoxicity, Antagonist, androgen receptor (AR)                                | Inactive | -0.957±0.003  | Inactive | -0.742±0.533 | Inactive | Inactive | OK |
| 10607 | podophyllotoxin | 743041  | Cytotoxicity, Antagonist, androgen receptor (AR)                                | Inactive | -0.649±0.123  | Inactive | -0.672±0.204 | Inactive | Inactive | OK |
| 10607 | podophyllotoxin | 1259242 | Cytotoxicity, Antagonist, androgen receptor (AR)                                | Inactive | -0.795±-0.046 | Inactive | -0.864±0.576 | Inactive | Inactive | OK |
| 10607 | podophyllotoxin | 743081  | Cytotoxicity, Antagonist, estrogen receptor alpha (ER-alpha)                    | Inactive | -0.643±-0.017 | Inactive | -0.684±0.232 | Inactive | Inactive | OK |
| 10607 | podophyllotoxin | 1259241 | Cytotoxicity, Antagonist, estrogen receptor alpha (ER-alpha)                    | Inactive | -0.957±-0.016 | Inactive | -0.786±0.476 | Inactive | Inactive | OK |
| 10607 | podophyllotoxin | 743221  | Cytotoxicity, Antagonist, farnesoid-X-receptor (FXR)                            | Inactive | -0.972±-0.007 | Inactive | -0.866±0.567 | Inactive | Inactive | OK |

|       |                 |         |                                                                                    |          |              |          |              |          |          |           |
|-------|-----------------|---------|------------------------------------------------------------------------------------|----------|--------------|----------|--------------|----------|----------|-----------|
| 10607 | podophyllotoxin | 720693  | Cytotoxicity, Antagonist, glucocorticoid receptor (GR)                             | Inactive | -0.892±0.034 | Inactive | -0.845±0.527 | Inactive | Inactive | <b>OK</b> |
| 10607 | podophyllotoxin | 743194  | Cytotoxicity, Antagonist, peroxisome proliferator-activated receptor gamma (PPARγ) | Inactive | -0.989±0.001 | Inactive | -0.933±0.495 | Inactive | Inactive | <b>OK</b> |
| 10607 | podophyllotoxin | 1159551 | Cytotoxicity, Antagonist, retinoid acid receptor (RAR)                             | Inactive | -0.948±0.02  | Inactive | -0.812±0.634 | Inactive | Inactive | <b>OK</b> |
| 10607 | podophyllotoxin | 1159520 | Cytotoxicity, Antagonist, retinoid-related orphan receptor gamma (ROR-gamma)       | Inactive | -0.985±0.008 | Inactive | -0.898±0.493 | Inactive | Inactive | <b>OK</b> |
| 10607 | podophyllotoxin | 743064  | Cytotoxicity, Antagonist, thyroid receptor (TR)                                    | Active   | -0.929±0.048 | Inactive | 0.109±0.59   | Inactive | Inactive |           |
| 10607 | podophyllotoxin | 743225  | Cytotoxicity, Antagonist, vitamin D receptor (VDR)                                 | Inactive | -0.986±0.004 | Inactive | -0.926±0.534 | Inactive | Inactive | <b>OK</b> |
| 10607 | podophyllotoxin | 1117346 | Cytotoxicity, DLD-1                                                                | Active   | -0.691±0.136 | Inactive | -0.378±0.504 | Inactive | Inactive |           |
| 10607 | podophyllotoxin | 1117336 | Cytotoxicity, HCT116                                                               | Active   | -0.727±0.191 | Inactive | -0.446±0.203 | Inactive | Inactive |           |
| 10607 | podophyllotoxin | 1117342 | Cytotoxicity, HCT116                                                               | Active   | -0.723±0.167 | Inactive | -0.271±0.125 | Inactive | Inactive |           |
| 10607 | podophyllotoxin | 1224868 | Cytotoxicity, HEK293                                                               | Active   | -0.885±0.014 | Inactive | -0.676±0.346 | Inactive | Inactive |           |
| 10607 | podophyllotoxin | 1224869 | Cytotoxicity, HEK293                                                               | Inactive | -0.489±0.03  | Inactive | -0.69±0.217  | NA       | Inactive | <b>OK</b> |
| 10607 | podophyllotoxin | 1224871 | Cytotoxicity, HEK293                                                               | Inactive | -0.965±0.014 | Inactive | -0.824±0.401 | Inactive | Inactive | <b>OK</b> |
| 10607 | podophyllotoxin | 1224872 | Cytotoxicity, HEK293                                                               | Inactive | -0.979±0.006 | Inactive | -0.798±0.35  | Inactive | Inactive | <b>OK</b> |
| 10607 | podophyllotoxin | 1224874 | Cytotoxicity, HEK293                                                               | Active   | -0.833±0.052 | Inactive | -0.678±0.328 | Inactive | Inactive |           |
| 10607 | podophyllotoxin | 1224875 | Cytotoxicity, HEK293                                                               | Inactive | -0.894±0.017 | Inactive | -0.926±0.333 | Inactive | Inactive | <b>OK</b> |
| 10607 | podophyllotoxin | 1224880 | Cytotoxicity, HEK293                                                               | Inactive | -0.555±0.012 | Inactive | -0.784±0.543 | Inactive | Inactive | <b>OK</b> |
| 10607 | podophyllotoxin | 1224881 | Cytotoxicity, HEK293                                                               | Inactive | -0.966±0.006 | Inactive | -0.882±0.468 | Inactive | Inactive | <b>OK</b> |
| 10607 | podophyllotoxin | 1224884 | Cytotoxicity, HEK293                                                               | Inactive | -0.813±0.074 | Inactive | -0.857±0.611 | NA       | Inactive | <b>OK</b> |
| 10607 | podophyllotoxin | 1224887 | Cytotoxicity, HEK293                                                               | Inactive | -0.961±0.004 | Inactive | -0.838±0.373 | Inactive | Inactive | <b>OK</b> |
| 10607 | podophyllotoxin | 1224888 | Cytotoxicity, HEK293                                                               | Inactive | -0.949±0.053 | Inactive | -0.917±0.645 | Inactive | Inactive | <b>OK</b> |
| 10607 | podophyllotoxin | 1224867 | Cytotoxicity, HepG2                                                                | Inactive | -0.975±0.045 | Inactive | -0.911±0.344 | Inactive | Inactive | <b>OK</b> |
| 10607 | podophyllotoxin | 1224870 | Cytotoxicity, HepG2                                                                | Inactive | -0.977±0.012 | Inactive | -0.905±0.318 | Inactive | Inactive | <b>OK</b> |
| 10607 | podophyllotoxin | 1224873 | Cytotoxicity, HepG2                                                                | Inactive | -0.985±0.029 | Inactive | -0.92±0.594  | Inactive | Inactive | <b>OK</b> |
| 10607 | podophyllotoxin | 1224876 | Cytotoxicity, HepG2                                                                | Inactive | -0.785±0.034 | Inactive | -0.806±0.483 | Inactive | Inactive | <b>OK</b> |
| 10607 | podophyllotoxin | 1224877 | Cytotoxicity, HepG2                                                                | Inactive | -0.982±0.026 | Inactive | -0.908±0.564 | Inactive | Inactive | <b>OK</b> |
| 10607 | podophyllotoxin | 1224878 | Cytotoxicity, HepG2                                                                | Inactive | -0.85±0.03   | Inactive | -0.733±0.412 | Inactive | Inactive | <b>OK</b> |

|       |                 |         |                                                |          |              |          |              |          |          |           |
|-------|-----------------|---------|------------------------------------------------|----------|--------------|----------|--------------|----------|----------|-----------|
| 10607 | podophyllotoxin | 1224879 | Cytotoxicity, HepG2                            | Inactive | -0.917±0.007 | Inactive | -0.621±0.388 | Inactive | Inactive | <b>OK</b> |
| 10607 | podophyllotoxin | 1224883 | Cytotoxicity, HepG2                            | Inactive | -0.818±0.041 | Inactive | -0.719±0.127 | Inactive | Inactive | <b>OK</b> |
| 10607 | podophyllotoxin | 1224885 | Cytotoxicity, HepG2                            | Inactive | -0.986±0.015 | Inactive | -0.919±0.551 | Inactive | Inactive | <b>OK</b> |
| 10607 | podophyllotoxin | 1224889 | Cytotoxicity, HepG2                            | Inactive | -0.711±0.074 | Inactive | -0.791±0.416 | Inactive | Inactive | <b>OK</b> |
| 10607 | podophyllotoxin | 1224890 | Cytotoxicity, HepG2                            | Inactive | -0.747±0.025 | Inactive | -0.846±0.592 | Inactive | Inactive | <b>OK</b> |
| 10607 | podophyllotoxin | 1905    | Cytotoxicity, IEC-6 intestinal epithelial      | Active   | 0.411±0.115  | Active   | -0.232±0.153 | Inactive | Active   | <b>OK</b> |
| 10607 | podophyllotoxin | 1907    | Cytotoxicity, IEC-6 intestinal epithelial      | Active   | 0.354±0.258  | Active   | -0.773±0.075 | Inactive | Active   | <b>OK</b> |
| 10607 | podophyllotoxin | 743084  | Cytotoxicity, inhibitors, aromatase            | Inactive | -0.873±0.014 | Inactive | -0.477±0.481 | Inactive | Inactive | <b>OK</b> |
| 10607 | podophyllotoxin | 743012  | Cytotoxicity, isogenic chicken DT40 cell line  | Active   | 0.246±0.109  | Active   | 0.315±0.042  | Active   | Active   | <b>OK</b> |
| 10607 | podophyllotoxin | 743014  | Cytotoxicity, isogenic chicken DT40 cell line  | Active   | -0.482±0.285 | Inactive | 0.311±0.06   | Active   | Active   | <b>OK</b> |
| 10607 | podophyllotoxin | 743015  | Cytotoxicity, isogenic chicken DT40 cell line  | Active   | 0.196±0.116  | Active   | 0.346±0.027  | Active   | Active   | <b>OK</b> |
| 10607 | podophyllotoxin | 364     | Cytotoxicity, Jurkat                           | Active   | -0.098±0.159 | Inactive | -0.717±0.465 | Inactive | Inactive |           |
| 10607 | podophyllotoxin | 720634  | Cytotoxicity, Mitochondria, membrane potential | Inactive | -0.89±0.047  | Inactive | -0.825±0.142 | Inactive | Inactive | <b>OK</b> |
| 10607 | podophyllotoxin | 687029  | Cytotoxicity, RMG-1 (PAX8)                     | Inactive | -0.598±0.118 | Inactive | -0.238±0.384 | Inactive | Inactive | <b>OK</b> |
| 10607 | podophyllotoxin | 743021  | Cytotoxicity, RMG-1 (PAX8)                     | Inactive | -0.941±0.049 | Inactive | -0.022±0.034 | Inactive | Inactive | <b>OK</b> |
| 10607 | podophyllotoxin | 624031  | Cytotoxicity, S16                              | Inactive | -0.883±0.06  | Inactive | -0.766±0.652 | Inactive | Inactive | <b>OK</b> |
| 10607 | podophyllotoxin | 1117343 | Cytotoxicity, SW480                            | Inactive | -0.83±0.132  | Inactive | -0.078±0.545 | Inactive | Inactive | <b>OK</b> |
| 10607 | podophyllotoxin | 651712  | Cytotoxicity, TMD8                             | Active   | -0.409±0.259 | Inactive | -0.691±0.541 | Inactive | Inactive |           |
| 10607 | podophyllotoxin | 521220  | Citotoxicidade, mouse neural precursor cells   | Active   | 0.476±0.324  | Active   | -0.436±0.787 | Inactive | Active   | <b>OK</b> |
| 10607 | podophyllotoxin | 1990    | Counterscreen, Luciferase                      | Active   | -0.014±0.385 | Inactive | 0.891±0.027  | Active   | Active   | <b>OK</b> |
| 10607 | podophyllotoxin | 624030  | Counterscreen, Luciferase                      | Inactive | -0.812±0.067 | Inactive | -0.433±0.647 | Inactive | Inactive | <b>OK</b> |
| 10607 | podophyllotoxin | 1117329 | Diabetes models                                | Inactive | -0.043±0.168 | Inactive | -0.75±0.825  | Inactive | Inactive | <b>OK</b> |
| 10607 | podophyllotoxin | 1117341 | Diabetes models                                | Inactive | -0.893±0.057 | Inactive | -0.635±0.745 | Inactive | Inactive | <b>OK</b> |
| 10607 | podophyllotoxin | 642     | dopamine D1 receptor                           | Active   | -0.34±0.186  | Inactive | -0.667±0.036 | Inactive | Inactive |           |
| 10607 | podophyllotoxin | 647     | dopamine D1 receptor                           | Active   | -0.112±0.206 | Inactive | -0.771±0.2   | Inactive | Inactive |           |
| 10607 | podophyllotoxin | 588506  | Fungus, Candida albicans                       | Inactive | 0.15±0.952   | NA       | -0.551±0.775 | NA       | Inactive | <b>OK</b> |
| 10607 | podophyllotoxin | 651632  | Genotoxicity, ATAD5                            | Active   | -0.277±0.159 | Inactive | -0.572±0.538 | Inactive | Inactive |           |
| 10607 | podophyllotoxin | 651634  | Genotoxicity, ATAD5                            | Inactive | -0.225±0.189 | Inactive | -0.689±0.534 | Inactive | Inactive | <b>OK</b> |

|       |                 |         |                                               |          |               |          |              |          |          |           |
|-------|-----------------|---------|-----------------------------------------------|----------|---------------|----------|--------------|----------|----------|-----------|
| 10607 | podophyllotoxin | 720516  | Genotoxicity, ATAD5                           | Active   | -0.669±-0.013 | Inactive | -0.535±0.514 | Inactive | Inactive |           |
| 10607 | podophyllotoxin | 450     | glucocorticoid receptor (GR)                  | Inactive | -0.87±-0.174  | Inactive | -0.47±-0.039 | Inactive | Inactive | <b>OK</b> |
| 10607 | podophyllotoxin | 493083  | Hsf1 protein                                  | Inactive | 0.306±0.396   | Inactive | 0.626±0.212  | Active   | Active   |           |
| 10607 | podophyllotoxin | 483     | Huntington disease protein                    | Inactive | -0.699±0.276  | Inactive | 0.705±0.9    | NA       | Inactive | <b>OK</b> |
| 10607 | podophyllotoxin | 1159510 | Immunotoxin (HA22)                            | Active   | -0.791±0.191  | Inactive | -0.615±0.066 | Inactive | Inactive |           |
| 10607 | podophyllotoxin | 1159512 | Immunotoxin (HA22)                            | Active   | -0.837±0.128  | Inactive | -0.598±0.228 | Inactive | Inactive |           |
| 10607 | podophyllotoxin | 1159511 | Immunotoxin (SS1P)                            | Active   | -0.881±0.116  | Inactive | -0.545±0.259 | Inactive | Inactive |           |
| 10607 | podophyllotoxin | 1159513 | Immunotoxin (SS1P)                            | Active   | -0.757±0.176  | Inactive | -0.652±0.282 | Inactive | Inactive |           |
| 10607 | podophyllotoxin | 743083  | Inhibitors, Aromatase                         | Inactive | -0.746±0.04   | Inactive | -0.537±0.052 | Inactive | Inactive | <b>OK</b> |
| 10607 | podophyllotoxin | 743139  | Inhibitors, Aromatase                         | Inactive | -0.825±0.048  | Inactive | 0.32±0.712   | Inactive | Inactive | <b>OK</b> |
| 10607 | podophyllotoxin | 720678  | Interference, Auto Fluorescence in HEK293     | Inactive | 0.799±0.388   | Active   | -0.705±0.214 | NA       | Active   |           |
| 10607 | podophyllotoxin | 720681  | Interference, Auto Fluorescence in HEK293     | Inactive | 0.624±0.293   | Active   | -0.7±0.158   | Inactive | Active   |           |
| 10607 | podophyllotoxin | 720685  | Interference, Auto Fluorescence in HepG2      | Inactive | 0.378±0.358   | Active   | -0.734±0.188 | Inactive | Active   |           |
| 10607 | podophyllotoxin | 720687  | Interference, Auto Fluorescence in HepG2      | Inactive | 0.586±0.34    | Active   | -0.72±0.112  | Inactive | Active   |           |
| 10607 | podophyllotoxin | 1224835 | Interference, Luciferase                      | Inactive | -0.894±-0.028 | Inactive | -0.459±0.055 | Inactive | Inactive | <b>OK</b> |
| 10607 | podophyllotoxin | 720635  | Mitochondria, disruptor membrane potential    | Active   | 0.103±0.102   | Inactive | 0.198±0.386  | Active   | Active   | <b>OK</b> |
| 10607 | podophyllotoxin | 720637  | Mitochondria, disruptor membrane potential    | Active   | -0.176±0.161  | Inactive | 0.225±0.048  | Active   | Active   | <b>OK</b> |
| 10607 | podophyllotoxin | 1332    | Mycobacterium tuberculosis                    | Inactive | -0.962±0.011  | Inactive | -0.689±0.592 | Inactive | Inactive | <b>OK</b> |
| 10607 | podophyllotoxin | 489041  | NF-kB induction (counterscreen)               | Active   | -0.259±0.273  | Inactive | -0.653±0.068 | Inactive | Inactive |           |
| 10607 | podophyllotoxin | 599     | Nuclear receptor ROR-alpha (counterscreen)    | Active   | -0.04±0.208   | Inactive | 0.068±0.197  | Inactive | Inactive |           |
| 10607 | podophyllotoxin | 652134  | nuclear receptor subfamily 0 group B member 1 | Active   | -0.419±0.169  | Inactive | -0.369±0.421 | Inactive | Inactive |           |
| 10607 | podophyllotoxin | 687017  | nuclear receptor subfamily 0 group B member 1 | Active   | -0.224±0.454  | Inactive | 0.599±0.182  | Active   | Active   | <b>OK</b> |
| 10607 | podophyllotoxin | 1117325 | Osteoporosis model                            | Active   | 0.012±0.36    | Inactive | 0.308±0.246  | Inactive | Inactive |           |
| 10607 | podophyllotoxin | 1117326 | Osteoporosis model                            | Active   | 0.465±0.241   | Active   | -0.496±0.767 | Inactive | Active   | <b>OK</b> |
| 10607 | podophyllotoxin | 1117327 | Osteoporosis model                            | Active   | 0.837±0.243   | Active   | 0.835±0.21   | Active   | Active   | <b>OK</b> |
| 10607 | podophyllotoxin | 608     | peptidyl-prolyl cis-trans isomerase FKBP1A    | Inactive | -0.512±-0.006 | Inactive | -0.92±0.41   | Inactive | Inactive | <b>OK</b> |

|        |                                |         |                                                      |          |               |          |              |          |          |           |
|--------|--------------------------------|---------|------------------------------------------------------|----------|---------------|----------|--------------|----------|----------|-----------|
| 10607  | podophyllotoxin                | 624032  | peripheral myelin protein 22                         | Active   | -0.229±0.324  | Inactive | -0.548±0.55  | Inactive | Inactive |           |
| 10607  | podophyllotoxin                | 624044  | peripheral myelin protein 22                         | Active   | 0.66±0.252    | Active   | -0.026±0.792 | NA       | Active   | <b>OK</b> |
| 10607  | podophyllotoxin                | 743244  | Plasmodium falciparum                                | Inactive | -0.908±0.003  | Inactive | -0.683±0.516 | Inactive | Inactive | <b>OK</b> |
| 10607  | podophyllotoxin                | 636     | Post-Golgi Transport                                 | Inactive | -0.211±0.056  | Inactive | 0.529±0.9    | NA       | Inactive | <b>OK</b> |
| 10607  | podophyllotoxin                | 624     | potassium voltage-gated channel subfamily J member 3 | Inactive | -0.96±-0.038  | Inactive | 0.454±0.89   | Inactive | Inactive | <b>OK</b> |
| 10607  | podophyllotoxin                | 504592  | Prion Protein 5' UTR mRNA                            | Active   | 0.475±0.172   | Active   | 0.777±0.045  | Active   | Active   | <b>OK</b> |
| 10607  | podophyllotoxin                | 446     | Stat Signaling Pathway                               | Inactive | -0.283±0.086  | Inactive | -0.346±0.909 | NA       | Inactive | <b>OK</b> |
| 10607  | podophyllotoxin                | 600     | steroidogenic factor 1                               | Active   | -0.732±0.228  | Inactive | 0.117±0.389  | Inactive | Inactive |           |
| 10607  | podophyllotoxin                | 652136  | steroidogenic factor 1 (counterscreen)               | Inactive | -0.84±0.085   | Inactive | -0.247±0.056 | Inactive | Inactive | <b>OK</b> |
| 10607  | podophyllotoxin                | 1159580 | Synergism from Chemical-Genetic Interactions         | Inactive | -0.497±0.158  | Inactive | -0.602±0.416 | Inactive | Inactive | <b>OK</b> |
| 10607  | podophyllotoxin                | 651629  | Triacylglycerol inhibitors                           | Active   | -0.287±0.235  | Inactive | -0.057±0.246 | Inactive | Inactive |           |
| 10607  | podophyllotoxin                | 651630  | Triacylglycerol inhibitors                           | Inactive | -0.441±0.291  | Inactive | 0.311±0.73   | Inactive | Inactive | <b>OK</b> |
| 10607  | podophyllotoxin                | 504865  | USP1 protein                                         | Inactive | -0.785±-0.056 | Inactive | -0.404±0.194 | Inactive | Inactive | <b>OK</b> |
| 10607  | podophyllotoxin                | 1117304 | Virus, Ebola                                         | Active   | 0.156±0.114   | Active   | -0.4±0.43    | Inactive | Active   | <b>OK</b> |
| 10607  | podophyllotoxin                | 1117305 | Virus, Ebola                                         | Active   | 0.105±0.149   | Inactive | -0.432±0.414 | Inactive | Inactive |           |
| 10607  | podophyllotoxin                | 1117312 | Virus, Ebola                                         | Active   | -0.219±0.204  | Inactive | -0.427±0.417 | Inactive | Inactive |           |
| 122797 | 4'-Demethyl-epipodophyllotoxin | 743122  | Activate, aryl hydrocarbon receptor (AhR)            | Active   | 0.134±0.171   | Inactive | -0.306±0.379 | Inactive | Inactive |           |
| 122797 | 4'-Demethyl-epipodophyllotoxin | 743040  | Agonist, androgen receptor (AR)                      | Inactive | -0.811±0.007  | Inactive | -0.799±0.388 | Inactive | Inactive | <b>OK</b> |
| 122797 | 4'-Demethyl-epipodophyllotoxin | 743079  | Agonist, estrogen receptor alpha (ER-alpha)          | Inactive | 0.501±0.12    | Active   | -0.03±0.554  | Inactive | Active   |           |
| 122797 | 4'-Demethyl-epipodophyllotoxin | 720691  | Agonist, glucocorticoid receptor (GR)                | Inactive | 0.081±0.137   | Inactive | -0.708±0.407 | Inactive | Inactive | <b>OK</b> |
| 122797 | 4'-Demethyl-epipodophyllotoxin | 720719  | Agonist, glucocorticoid receptor (GR)                | Inactive | 0.137±0.134   | Inactive | -0.703±0.412 | Inactive | Inactive | <b>OK</b> |
| 122797 | 4'-Demethyl-epipodophyllotoxin | 651631  | Agonist, p53                                         | Active   | 0.499±0.192   | Active   | 0.464±0.164  | Active   | Active   | <b>OK</b> |
| 122797 | 4'-Demethyl-epipodophyllotoxin | 720552  | Agonist, p53                                         | Active   | 0.445±0.251   | Active   | 0.586±0.159  | Active   | Active   | <b>OK</b> |
| 122797 | 4'-Demethyl-epipodophyllotoxin | 743035  | Antagonist, androgen receptor (AR)                   | Active   | -0.9±0.05     | Inactive | -0.608±0.385 | Inactive | Inactive |           |
| 122797 | 4'-Demethyl-epipodophyllotoxin | 743042  | Antagonist, androgen receptor (AR)                   | Inactive | -0.909±0.068  | Inactive | -0.708±0.436 | Inactive | Inactive | <b>OK</b> |
| 122797 | 4'-Demethyl-epipodophyllotoxin | 743063  | Antagonist, androgen receptor (AR)                   | Active   | -0.752±0.104  | Inactive | -0.69±0.366  | Inactive | Inactive |           |
| 122797 | 4'-Demethyl-epipodophyllotoxin | 743069  | Antagonist, estrogen receptor alpha (ER-alpha)       | Inactive | 0.462±0.198   | Active   | -0.528±0.481 | Inactive | Active   |           |
| 122797 | 4'-Demethyl-epipodophyllotoxin | 743078  | Antagonist, estrogen receptor alpha (ER-alpha)       | Inactive | 0.504±0.201   | Active   | -0.33±0.501  | Inactive | Active   |           |

|        |                                |        |                                                              |          |               |          |              |          |          |    |
|--------|--------------------------------|--------|--------------------------------------------------------------|----------|---------------|----------|--------------|----------|----------|----|
| 122797 | 4'-Demethyl-epipodophyllotoxin | 743065 | Antagonist, thyroid receptor (TR)                            | Active   | -0.078±0.196  | Inactive | -0.411±0.069 | Inactive | Inactive |    |
| 122797 | 4'-Demethyl-epipodophyllotoxin | 743086 | Cytotoxicity, Activate, aryl hydrocarbon receptor (AhR)      | Active   | 0.75±0.161    | Active   | -0.454±0.595 | Inactive | Active   | OK |
| 122797 | 4'-Demethyl-epipodophyllotoxin | 651633 | Cytotoxicity, Agonist, p53                                   | Inactive | -0.961±0.001  | Inactive | -0.773±0.457 | Inactive | Inactive | OK |
| 122797 | 4'-Demethyl-epipodophyllotoxin | 743074 | Cytotoxicity, Antagonist, estrogen receptor alpha (ER-alpha) | Inactive | -0.966±-0.014 | Inactive | -0.85±0.617  | Inactive | Inactive | OK |
| 122797 | 4'-Demethyl-epipodophyllotoxin | 720693 | Cytotoxicity, Antagonist, glucocorticoid receptor (GR)       | Inactive | -0.915±-0.033 | Inactive | -0.821±0.528 | Inactive | Inactive | OK |
| 122797 | 4'-Demethyl-epipodophyllotoxin | 743064 | Cytotoxicity, Antagonist, thyroid receptor (TR)              | Active   | 0.024±0.198   | Inactive | 0.049±0.562  | Inactive | Inactive |    |
| 122797 | 4'-Demethyl-epipodophyllotoxin | 743084 | Cytotoxicity, inhibitors, aromatase                          | Inactive | -0.567±0.12   | Inactive | -0.3±0.513   | Inactive | Inactive | OK |
| 122797 | 4'-Demethyl-epipodophyllotoxin | 743012 | Cytotoxicity, isogenic chicken DT40 cell line                | Active   | 0.224±0.117   | Active   | -0.271±0.432 | Inactive | Active   | OK |
| 122797 | 4'-Demethyl-epipodophyllotoxin | 743014 | Cytotoxicity, isogenic chicken DT40 cell line                | Active   | -0.2±0.224    | Inactive | -0.226±0.444 | Inactive | Inactive |    |
| 122797 | 4'-Demethyl-epipodophyllotoxin | 743015 | Cytotoxicity, isogenic chicken DT40 cell line                | Active   | 0.253±0.109   | Active   | 0.008±0.554  | Inactive | Active   | OK |
| 122797 | 4'-Demethyl-epipodophyllotoxin | 720634 | Cytotoxicity, Mitochondria, membrane potential               | Inactive | -0.814±-0.032 | Inactive | -0.835±0.428 | Inactive | Inactive | OK |
| 122797 | 4'-Demethyl-epipodophyllotoxin | 651632 | Genotoxicity, ATAD5                                          | Active   | 0.229±0.257   | Inactive | -0.539±0.133 | Inactive | Inactive |    |
| 122797 | 4'-Demethyl-epipodophyllotoxin | 651634 | Genotoxicity, ATAD5                                          | Active   | 0.53±0.175    | Active   | -0.546±0.539 | Inactive | Active   | OK |
| 122797 | 4'-Demethyl-epipodophyllotoxin | 720516 | Genotoxicity, ATAD5                                          | Active   | 0.337±0.257   | Active   | -0.441±0.522 | Inactive | Active   | OK |
| 122797 | 4'-Demethyl-epipodophyllotoxin | 743083 | Inhibitors, Aromatase                                        | Inactive | -0.533±0.205  | Inactive | -0.689±0.374 | Inactive | Inactive | OK |
| 122797 | 4'-Demethyl-epipodophyllotoxin | 743139 | Inhibitors, Aromatase                                        | Inactive | -0.907±-0.018 | Inactive | -0.438±0.479 | Inactive | Inactive | OK |
| 122797 | 4'-Demethyl-epipodophyllotoxin | 720678 | Interference, Auto Fluorescence in HEK293                    | Inactive | 0.699±0.401   | Active   | -0.692±0.218 | NA       | Active   |    |
| 122797 | 4'-Demethyl-epipodophyllotoxin | 720681 | Interference, Auto Fluorescence in HEK293                    | Inactive | 0.561±0.346   | Active   | -0.693±0.16  | Inactive | Active   |    |
| 122797 | 4'-Demethyl-epipodophyllotoxin | 720685 | Interference, Auto Fluorescence in HepG2                     | Inactive | 0.184±0.325   | Inactive | -0.724±0.191 | Inactive | Inactive | OK |
| 122797 | 4'-Demethyl-epipodophyllotoxin | 720687 | Interference, Auto Fluorescence in HepG2                     | Inactive | 0.528±0.344   | Active   | -0.713±0.114 | Inactive | Active   |    |
| 122797 | 4'-Demethyl-epipodophyllotoxin | 720635 | Mitochondria, disruptor membrane potential                   | Active   | 0.078±0.115   | Inactive | 0.054±0.049  | Inactive | Inactive |    |
| 122797 | 4'-Demethyl-epipodophyllotoxin | 720637 | Mitochondria, disruptor membrane potential                   | Active   | -0.023±0.13   | Inactive | 0.152±0.404  | Active   | Active   | OK |
| 122797 | 4'-Demethyl-epipodophyllotoxin | 743244 | Plasmodium falciparum                                        | Inactive | -0.873±-0.009 | Inactive | -0.715±0.23  | Inactive | Inactive | OK |
| 36462  | Etoposideo                     | 743472 | Cytotoxicity, A549                                           | Inactive | -0.384±0.367  | Inactive | -0.47±0.319  | Inactive | Inactive | OK |

|        |            |        |                                                                        |          |              |          |              |          |          |           |
|--------|------------|--------|------------------------------------------------------------------------|----------|--------------|----------|--------------|----------|----------|-----------|
| 36462  | Etoposideo | 504861 | Cytotoxicity, HEK293                                                   | Active   | -0.697±0.152 | Inactive | -0.356±0.532 | Inactive | Inactive |           |
| 36462  | Etoposideo | 743471 | Cytotoxicity, HepG2                                                    | Inactive | -0.035±0.749 | Inactive | 0.867±0.08   | Active   | Active   |           |
| 36462  | Etoposideo | 521220 | Citotoxicidade, mouse neural precursor cells                           | Inactive | 0.674±0.273  | Active   | -0.657±0.783 | Inactive | Active   |           |
| 36462  | Etoposideo | 537733 | Fungus, Candida albicans                                               | Active   | 0.164±0.505  | Inactive | 0.64±0.045   | Active   | Active   | <b>OK</b> |
| 36462  | Etoposideo | 588794 | Herpes simplex virus Virion Protein 16 (counterscreen)                 | Inactive | 0.439±0.234  | Active   | 0.857±0.074  | Active   | Active   |           |
| 36462  | Etoposideo | 588824 | Herpes simplex virus Virion Protein 16 (counterscreen)                 | Inactive | 0.402±0.289  | Active   | 0.855±0.055  | Active   | Active   |           |
| 36462  | Etoposideo | 651615 | Herpes simplex virus Virion Protein 16 (counterscreen)                 | Inactive | 0.95±0.029   | Active   | 0.846±0.072  | Active   | Active   |           |
| 36462  | Etoposideo | 1332   | Mycobacterium tuberculosis                                             | Inactive | -0.989±0.015 | Inactive | -0.852±0.585 | Inactive | Inactive | <b>OK</b> |
| 36462  | Etoposideo | 651613 | nuclear receptor subfamily 5 group A member 2                          | Active   | 0.858±0.255  | Active   | 0.787±0.012  | Active   | Active   | <b>OK</b> |
| 36462  | Etoposideo | 588820 | Steroid Receptor Coactivator 1                                         | Active   | 0.442±0.241  | Active   | 0.8±0.088    | Active   | Active   | <b>OK</b> |
| 36462  | Etoposideo | 602235 | Steroid Receptor Coactivator 1                                         | Active   | -0.952±0.127 | Inactive | -0.947±0.637 | Inactive | Inactive |           |
| 36462  | Etoposideo | 602168 | Steroid Receptor Coactivator 1 (counterscreen)                         | Inactive | 0.542±0.26   | Active   | 0.731±0.155  | Active   | Active   |           |
| 36462  | Etoposideo | 588792 | Steroid Receptor Coactivator 3                                         | Active   | 0.579±0.161  | Active   | 0.803±0.06   | Active   | Active   | <b>OK</b> |
| 36462  | Etoposideo | 602166 | Steroid Receptor Coactivator 3                                         | Active   | 0.114±0.442  | Inactive | 0.583±0.335  | Active   | Active   | <b>OK</b> |
| 36462  | Etoposideo | 602234 | Steroid Receptor Coactivator 3 (counterscreen)                         | Active   | -0.882±0.144 | Inactive | -0.902±0.154 | NA       | Inactive |           |
| 36462  | Etoposideo | 651611 | Steroidogenic acute regulatory protein (StAR) promoter (counterscreen) | Active   | 0.975±0.012  | Active   | 0.844±0.064  | Active   | Active   | <b>OK</b> |
| 36462  | Etoposideo | 504882 | Virus, Epstein-Barr                                                    | Active   | -0.562±0.189 | Inactive | -0.802±0.474 | Inactive | Inactive |           |
| 36462  | Etoposideo | 588343 | Virus, Epstein-Barr                                                    | Active   | -0.93±0.063  | Inactive | -0.881±0.302 | Inactive | Inactive |           |
| 36462  | Etoposideo | 588398 | Virus, Epstein-Barr                                                    | Active   | -0.966±0.084 | Inactive | 0.788±0.175  | Active   | Active   | <b>OK</b> |
| 100492 | Diphyllin  | 624002 | Anticancer, glioblastoma                                               | Active   | 0.523±0.296  | Active   | 0.211±-0.088 | Active   | Active   | <b>OK</b> |
| 100492 | Diphyllin  | 1013   | Anti-Inflammatory model                                                | Active   | 0.252±0.278  | Inactive | 0.819±0.159  | Active   | Active   | <b>OK</b> |
| 100492 | Diphyllin  | 1249   | Anti-Inflammatory model                                                | Inactive | -0.244±0.131 | Inactive | 0.654±0.939  | NA       | Inactive | <b>OK</b> |
| 100492 | Diphyllin  | 464    | Cytotoxicity, Jurkat                                                   | Inactive | 0.237±0.225  | Active   | -0.478±0.151 | Inactive | Active   |           |
| 100492 | Diphyllin  | 2010   | Cytotoxicity, NIH3T3                                                   | Inactive | -0.428±0.254 | Inactive | 0.79±0.119   | Active   | Active   |           |
| 100492 | Diphyllin  | 2327   | Cytotoxicity, NIH3T3                                                   | Active   | -0.791±0.201 | Inactive | 0.684±0.127  | Active   | Active   | <b>OK</b> |
| 100492 | Diphyllin  | 1650   | Cytotoxicity, Vero Cells                                               | Inactive | -0.731±0.111 | Inactive | 0.847±0.039  | Active   | Active   |           |
| 100492 | Diphyllin  | 2423   | Fungus, Candida albicans                                               | Active   | 0.003±0.289  | Inactive | 0.713±0.024  | Active   | Active   | <b>OK</b> |

|        |                |         |                                                        |          |              |          |              |          |          |           |
|--------|----------------|---------|--------------------------------------------------------|----------|--------------|----------|--------------|----------|----------|-----------|
| 100492 | Diphyllin      | 2467    | Fungus, Candida albicans                               | Active   | -0.024±0.267 | Inactive | -0.357±0.27  | Inactive | Inactive |           |
| 100492 | Diphyllin      | 588350  | GAA30 promoter (counterscreen)                         | Inactive | -0.131±0.196 | Inactive | 0.694±0.008  | Active   | Active   |           |
| 100492 | Diphyllin      | 434954  | glycogen synthase kinase-3 alpha                       | Active   | -0.693±0.116 | Inactive | 0.11±0.643   | Inactive | Inactive |           |
| 100492 | Diphyllin      | 624379  | Herpes simplex virus Virion Protein 16 (counterscreen) | Inactive | -0.011±0.212 | Inactive | 0.058±0.241  | Inactive | Inactive | <b>OK</b> |
| 100492 | Diphyllin      | 624395  | Herpes simplex virus Virion Protein 16 (counterscreen) | Active   | 0.495±0.381  | Active   | 0.831±0.041  | Active   | Active   | <b>OK</b> |
| 100492 | Diphyllin      | 652134  | nuclear receptor subfamily 0 group B member 1          | Active   | -0.076±0.183 | Inactive | 0.498±0.07   | Active   | Active   | <b>OK</b> |
| 100492 | Diphyllin      | 687017  | nuclear receptor subfamily 0 group B member 1          | Inactive | -0.125±0.446 | Inactive | 0.599±0.177  | Active   | Active   |           |
| 100492 | Diphyllin      | 624378  | photoreceptor-specific nuclear receptor                | Active   | 0.166±0.281  | Inactive | 0±0.203      | Inactive | Inactive |           |
| 100492 | Diphyllin      | 624394  | photoreceptor-specific nuclear receptor                | Active   | 0.056±0.563  | NA       | -0.51±0.451  | Inactive | Inactive |           |
| 100492 | Diphyllin      | 504848  | Plasmodium falciparum                                  | Active   | 0.086±0.244  | Inactive | -0.727±0.177 | Inactive | Inactive |           |
| 100492 | Diphyllin      | 504850  | Plasmodium falciparum                                  | Active   | -0.243±0.242 | Inactive | -0.646±0.228 | Inactive | Inactive |           |
| 100492 | Diphyllin      | 652136  | steroidogenic factor 1 (counterscreen)                 | Inactive | -0.732±0.117 | Inactive | -0.282±0.425 | Inactive | Inactive | <b>OK</b> |
| 92122  | beta-Peltatin  | 264     | Anticancer, Human Lung LX-1 Xenograft                  | Active   | 0.43±0.739   | NA       | -0.063±0.712 | Inactive | Inactive |           |
| 92122  | beta-Peltatin  | 296     | Anticancer, Human Mammary Carcinoma                    | Inactive | -0.878±0.306 | Inactive | -0.843±0.589 | Inactive | Inactive | <b>OK</b> |
| 92122  | beta-Peltatin  | 111     | Anticancer, Leukemia                                   | Active   | 0.606±0.054  | Active   | 0.488±0.806  | Inactive | Active   | <b>OK</b> |
| 92122  | beta-Peltatin  | 117     | Anticancer, Leukemia                                   | Active   | 0.358±0.137  | Active   | 0.015±0.735  | Inactive | Active   | <b>OK</b> |
| 92122  | beta-Peltatin  | 258     | Anticancer, Leukemia                                   | Inactive | -0.756±0.155 | Inactive | -0.905±0.517 | Inactive | Inactive | <b>OK</b> |
| 92122  | beta-Peltatin  | 328     | Anticancer, Leukemia                                   | Active   | 0.486±0.087  | Active   | -0.41±0.095  | Inactive | Active   | <b>OK</b> |
| 92122  | beta-Peltatin  | 192     | Anticancer, Melanoma                                   | Inactive | -0.511±0.059 | Inactive | -0.267±0.557 | Inactive | Inactive | <b>OK</b> |
| 92122  | beta-Peltatin  | 127     | Anticancer, Renal tumor                                | Active   | 0.531±0.064  | Active   | 0.295±0.731  | Inactive | Active   | <b>OK</b> |
| 92122  | beta-Peltatin  | 292     | Anticancer, Sarcoma                                    | Active   | 0.352±0.252  | Active   | -0.368±0.547 | Inactive | Active   | <b>OK</b> |
| 92122  | beta-Peltatin  | 608     | peptidyl-prolyl cis-trans isomerase FKBP1A             | Inactive | -0.452±0.012 | Inactive | -0.923±0.413 | Inactive | Inactive | <b>OK</b> |
| 92122  | beta-Peltatin  | 1159580 | Synergism from Chemical-Genetic Interactions           | Inactive | -0.729±0.072 | Inactive | -0.446±0.434 | Inactive | Inactive | <b>OK</b> |
| 92129  | alpha-Peltatin | 264     | Anticancer, Human Lung LX-1 Xenograft                  | Active   | 0.516±0.727  | NA       | -0.209±0.593 | Inactive | Inactive |           |
| 92129  | alpha-Peltatin | 296     | Anticancer, Human Mammary Carcinoma                    | Inactive | -0.506±0.496 | Inactive | -0.763±0.591 | Inactive | Inactive | <b>OK</b> |
| 92129  | alpha-Peltatin | 111     | Anticancer, Leukemia                                   | Active   | 0.691±0.053  | Active   | 0.609±0.092  | Active   | Active   | <b>OK</b> |

|        |                                      |         |                                                 |          |              |          |              |          |          |    |
|--------|--------------------------------------|---------|-------------------------------------------------|----------|--------------|----------|--------------|----------|----------|----|
| 92129  | alpha-Peltatin                       | 117     | Anticancer, Leukemia                            | Active   | 0.481±0.097  | Active   | 0.381±0.752  | Inactive | Active   | OK |
| 92129  | alpha-Peltatin                       | 258     | Anticancer, Leukemia                            | Inactive | -0.834±0.142 | Inactive | -0.945±0.517 | Inactive | Inactive | OK |
| 92129  | alpha-Peltatin                       | 190     | Anticancer, Lymphoma                            | Inactive | 0.095±0.166  | Inactive | -0.558±0.427 | Inactive | Inactive | OK |
| 92129  | alpha-Peltatin                       | 192     | Anticancer, Melanoma                            | Inactive | -0.587±0.069 | Inactive | -0.087±0.579 | Inactive | Inactive | OK |
| 92129  | alpha-Peltatin                       | 127     | Anticancer, Renal tumor                         | Active   | 0.562±0.019  | Active   | 0.495±0.07   | Active   | Active   | OK |
| 345501 | Deoxypodophyllotoxin                 | 111     | Anticancer, Leukemia                            | Active   | 0.435±0.115  | Active   | -0.166±0.275 | Inactive | Active   | OK |
| 345501 | Deoxypodophyllotoxin                 | 117     | Anticancer, Leukemia                            | Active   | -0.18±0.255  | Inactive | -0.328±0.718 | Inactive | Inactive |    |
| 345501 | Deoxypodophyllotoxin                 | 328     | Anticancer, Leukemia                            | Active   | 0.498±0.067  | Active   | -0.621±0.437 | Inactive | Active   | OK |
| 345501 | Deoxypodophyllotoxin                 | 190     | Anticancer, Lymphoma                            | Inactive | -0.657±0.144 | Inactive | -0.81±0.415  | Inactive | Inactive | OK |
| 345501 | Deoxypodophyllotoxin                 | 192     | Anticancer, Melanoma                            | Inactive | -0.289±0.113 | Inactive | -0.53±0.538  | Inactive | Inactive | OK |
| 345501 | Deoxypodophyllotoxin                 | 127     | Anticancer, Renal tumor                         | Active   | 0.315±0.123  | Active   | -0.073±0.715 | Inactive | Active   | OK |
| 72435  | Picropodophyllin                     | 328     | Anticancer, Leukemia                            | Active   | 0.685±0.045  | Active   | -0.221±0.506 | Inactive | Active   | OK |
| 72435  | Picropodophyllin                     | 190     | Anticancer, Lymphoma                            | Inactive | 0.232±0.128  | Active   | -0.566±0.427 | Inactive | Active   |    |
| 72435  | Picropodophyllin                     | 192     | Anticancer, Melanoma                            | Inactive | 0.094±0.165  | Inactive | -0.014±0.592 | Inactive | Inactive | OK |
| 72435  | Picropodophyllin                     | 608     | peptidyl-prolyl cis-trans isomerase<br>FKBP1A   | Inactive | -0.293±0.075 | Inactive | -0.977±0.472 | Inactive | Inactive | OK |
| 72435  | Picropodophyllin                     | 1159580 | Synergism from Chemical-Genetic<br>Interactions | Inactive | -0.518±0.142 | Inactive | -0.655±0.411 | Inactive | Inactive | OK |
| 119458 | cleistanthin (B)                     | 449703  | Plasmodium falciparum                           | Active   | -0.32±0.23   | Inactive | -0.22±0.511  | Inactive | Inactive |    |
| 119458 | cleistanthin (B)                     | 449704  | Plasmodium falciparum                           | Active   | -0.352±0.215 | Inactive | 0.097±0.414  | Inactive | Inactive |    |
| 119458 | cleistanthin (B)                     | 602156  | Plasmodium falciparum                           | Inactive | -0.645±0.023 | Inactive | 0.678±0.204  | Active   | Active   |    |
| 160705 | 4'-Demethyl-<br>deoxypodophyllotoxin | 365     | ribonuclease H1, E. coli                        | Active   | -0.496±0.204 | Inactive | -0.332±0.13  | Inactive | Inactive |    |
| 160705 | 4'-Demethyl-<br>deoxypodophyllotoxin | 366     | ribonuclease H1, Human                          | Active   | -0.686±0.191 | Inactive | 0.474±0.055  | Active   | Active   | OK |
| 160705 | 4'-Demethyl-<br>deoxypodophyllotoxin | 367     | Virus, HIV-2                                    | Inactive | 0.075±0.354  | Inactive | 0.652±0.033  | Active   | Active   |    |
| 164791 | Podophyllotoxin acetate              | 608     | peptidyl-prolyl cis-trans isomerase<br>FKBP1A   | Inactive | 0.177±0.146  | Inactive | -0.745±0.779 | Inactive | Inactive | OK |
| 164791 | Podophyllotoxin acetate              | 1159580 | Synergism from Chemical-Genetic<br>Interactions | Inactive | -0.064±0.313 | Inactive | -0.177±0.485 | Inactive | Inactive | OK |
| 159962 | beta-Peltatin A methyl ether         | 328     | Anticancer, Leukemia                            | Active   | 0.376±0.112  | Active   | -0.602±0.44  | Inactive | Active   | OK |
